# Supplementary material for: Mechanistic insights into HCO2H dehydrogenation and CO2 hydrogenation catalyzed by Ir(Cp*) containing tetrahydroxy bipyrimidine ligand: the role of sodium and proton shuttle
Source: Royal Society of Chemistry journal article supplement (doi:10.1039/c8dt03283a), 2018-01-01
Supplement: c8dt03283a1.pdf [file c8dt03283a1.pdf]

# Electronic Supplementary Information

## Mechanistic Insights into HCO<sub>2</sub>H Dehydrogenation and CO<sub>2</sub> Hydrogenation Catalyzed by Ir(Cp\*) Containing Tetrahydroxy Bipyrimidine Ligand: The Role of Sodium and Proton Shuttle

*Tanakorn Wonglakhon<sup>a</sup> and Panida Surawatanawong<sup>\*a,b</sup>*

<sup>a</sup>Department of Chemistry and Center of Excellence for Innovation in Chemistry,  
Faculty of Science, Mahidol University, Bangkok 10400, Thailand.

<sup>b</sup>Center of Sustainable Energy and Green Materials, Mahidol University, Salaya, Nakhon  
Pathom 73170, Thailand.

\*E-mail: panida.sur@mahidol.ac.th

## Standard state conversion<sup>1-2</sup>

The default parameters in Gaussian 09, standard state in gas phase at 1 atm and 298.15 K, were used for all calculations. Thus, the relative free energies of all species are converted from standard state at 1 atm, to the standard state in solution (1 M). The standard state conversion of free energy change for the reaction of reactants A and B to form product C from 1 atm to 1 M (eq. S1) can be calculated using eq. S2. In eq. S2,  $\Delta G^\circ$  is the standard state free energy change at 1 atm,  $\Delta G^*$  is the standard state free energy change at 1 M,  $R$  is the gas constant,  $T$  is the absolute temperature (in Kelvin),  $Q^\circ$  is the reaction quotient at 1 atm, and  $Q^*$  is the reaction quotient at 1 M. Note that  $\Delta G^\circ$  and  $\Delta G^*$  here refer to the changes in solution phase because all geometries were optimized in this phase, as mentioned in the main text. Assuming A, B, and C to be ideal gases, we can thus represent their concentrations at 1 atm and 298.15 K as (1/24.5) mol/L. Therefore, the standard state free energy change at 1 atm ( $\Delta G^\circ$ ) can be converted to the standard state free energy change at 1 M ( $\Delta G^*$ ), through eq. S5-S7.

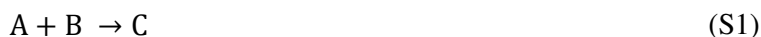

$$\Delta G^* = \Delta G^\circ + RT \ln \left( \frac{Q^*}{Q^\circ} \right) \quad (\text{S2})$$

$$Q^\circ = \frac{[C]_{1 \text{ atm}}}{[A]_{1 \text{ atm}}[B]_{1 \text{ atm}}} \quad (\text{S3})$$

$$Q^* = \frac{[C]_{1 \text{ M}}}{[A]_{1 \text{ M}}[B]_{1 \text{ M}}} \quad (\text{S4})$$

$$\Delta G^* = \Delta G^\circ + RT \ln \left( \frac{1}{\frac{1 \cdot 1}{24.5 \cdot 24.5}} \right) \quad (\text{S5})$$

$$\Delta G^* = \Delta G^\circ - RT \ln (24.5) \quad (\text{S6})$$

$$\Delta G^* = \Delta G^\circ - 1.89 \text{ kcal/mol} \quad (\text{S7})$$

For the reaction involving a water molecule arising from water solvent, the standard state concentration for water is adjusted from 1 atm to 55.6 M, which is the standard state concentration of the bulk water. The standard state free energy change for the reaction of A with water in aqueous solution (eq. S8) can be calculated using eqs. S9-S14. Note that, in eq. S9,  $Q^*$  is the reaction quotient at 1 M for all species except for water, for which the concentration was adjusted to 55.6 M (eq. S11).

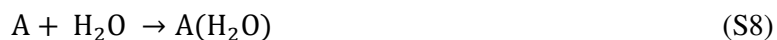

$$\Delta G^* = \Delta G^\circ + RT \ln \left( \frac{Q^*}{Q^\circ} \right) \quad (S9)$$

$$Q^\circ = \frac{[A(H_2O)]_{1 \text{ atm}}}{[A]_{1 \text{ atm}} [H_2O]_{1 \text{ atm}}} \quad (S10)$$

$$Q^* = \frac{[A(H_2O)]_{1 \text{ M}}}{[A]_{1 \text{ M}} [H_2O]_{55.6 \text{ M}}} \quad (S11)$$

$$\Delta G^* = \Delta G^\circ + RT \ln \left( \left( \frac{1}{\frac{1 \cdot 1}{24.5 \cdot 24.5}} \right) \left( \frac{1}{1 \cdot 55.6} \right) \right) \quad (S12)$$

$$\Delta G^* = \Delta G^\circ - RT \ln (24.5 \times 55.6) \quad (S13)$$

$$\Delta G^* = \Delta G^\circ - 4.27 \text{ kcal/mol} \quad (S14)$$

### pH correction<sup>3-5</sup>

For the reaction involving a proton ( $H^+$ ) transfer (eq. S15), the proton dissociation energy, corrected to pH 3.5, can be calculated from eq. S16-S18:

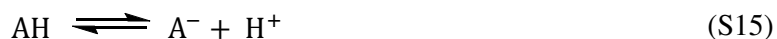

$$\Delta G^* = \Delta G^\circ + RT \ln \left( \frac{Q^*}{Q^\circ} \right) \quad (S16)$$

$$Q^\circ = \frac{[A^-]_{1\text{ atm}}[H^+]_{1\text{ atm}}}{[AH]_{1\text{ atm}}} \quad (\text{S17})$$

$$Q^* = \frac{[A^-]_{1\text{ M}}[H^+]_{\text{at pH } 3.5}}{[AH]_{1\text{ M}}} \quad (\text{S18})$$

where  $\Delta G^\circ$  is the standard state free energy change at 1 atm and  $\Delta G^*$  is the standard state free energy change at 1 M except for the proton concentration, which is adjusted corresponding to that at pH 3.5. The proton concentration  $[H^+]$  is taken from the pH (eq. S19-S20). Then, the standard state proton dissociation free energy at pH 3.5 ( $\Delta G^*$ ) can be calculated according to eq. S21-S23.

$$\text{pH} = 3.5 = -\log[H^+] \quad (\text{S19})$$

$$[H^+] = 10^{-3.5} \quad (\text{S20})$$

$$\Delta G^* = \Delta G^\circ + RT \ln \left( \frac{1 \cdot (10^{-3.5})}{\frac{1}{24.5}} \right) \quad (\text{S21})$$

$$\Delta G^* = \Delta G^\circ + 1.89 - 3.5 RT \ln(10) \quad (\text{S22})$$

$$\Delta G^* = \Delta G^\circ + 1.89 - 4.77 \text{ kcal/mol} . \quad (\text{S23})$$

Using the same procedure above, the standard state free energy change  $\Delta G^*$  can be adjusted for proton dissociation at pH 7.6 ( $\Delta G^* = \Delta G^\circ + 1.89 - 10.36 \text{ kcal/mol}$ ), and 8.3 ( $\Delta G^* = \Delta G^\circ + 1.89 - 11.31 \text{ kcal/mol}$ ).

### Solvation free energy of sodium ion

Free energy change for the transfer of a sodium ion from gas phase into solution phase is the solvation free energy of sodium,  $\Delta G_s^*(Na^+)$ , which can be represented as

$$\Delta G_s^*(Na^+) = G_{aq}^*(Na^+) - G_g^\circ(Na^+) - \Delta G^{o \rightarrow *}$$
(S24)

where the  $G_{aq}^*(Na^+)$  and  $G_g^\circ(Na^+)$  are the free energies of sodium ion in aqueous and gas phases, respectively. The  $\Delta G^{o \rightarrow *}$  is the free energy correction from the 1 atm standard state to 1 M as described above.

To calculate the  $\Delta G_s^*(Na^+)$ , a thermodynamic cycle in Scheme S1 is employed.<sup>2</sup> We applied a mixed cluster/continuum model in this thermodynamic cycle,<sup>2</sup> where the  $Na^+$  is surrounded by a water cluster ( $n$  is the number of water molecule) to account for the interaction between the first solvation shell and the bulk. The upper leg represents the free energy change in gas phase ( $\Delta G_g^o(Na^+)$ ), while the lower leg the free energy change in aqueous phase,  $\Delta G_{aq}^*(Na^+)$ . In water solvent, the  $\Delta G_{aq}^*(Na^+)$  is equal to zero.<sup>2</sup> By relating the free energy change in gas phase ( $\Delta G_g^o(Na^+)$ ) to the solvation free energy of each species ( $\Delta G_s^*(Na^+)$ ,  $\Delta G_s^*((H_2O)_n)$ , and  $\Delta G_s^*(Na^+(H_2O)_n)$ ), we can calculate the  $\Delta G_s^*(Na^+)$  as follows:

$$\Delta G_s^*(Na^+) = \Delta G_s^*(Na^+(H_2O)_n) + \Delta G_g^o(Na^+) - \Delta G_s^*((H_2O)_n) - \Delta G^{o \rightarrow *} - \Delta G_w^{* \rightarrow 55.6 M} \quad (S25)$$

where  $\Delta G_w^{* \rightarrow 55.6 M}$ , the correction for water cluster, is equal to  $RT \ln(55.6/n)$ .

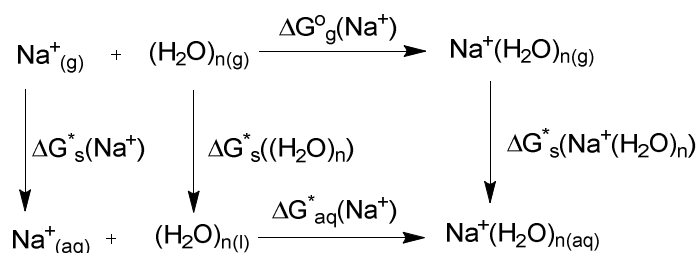

**Scheme S1** Thermodynamic cycle for the calculation of solvation free energy of sodium ion.

Table S1 shows the calculated solvation free energies of  $Na^+$ . The optimized structures of  $Na^+$  solvated by water ( $Na^+(H_2O)_n$ ,  $n = 1-6$ ) and water cluster ( $(H_2O)_n$ ,  $n = 1-6$ ) used for obtaining the calculated values in Table S1 are shown as follows:

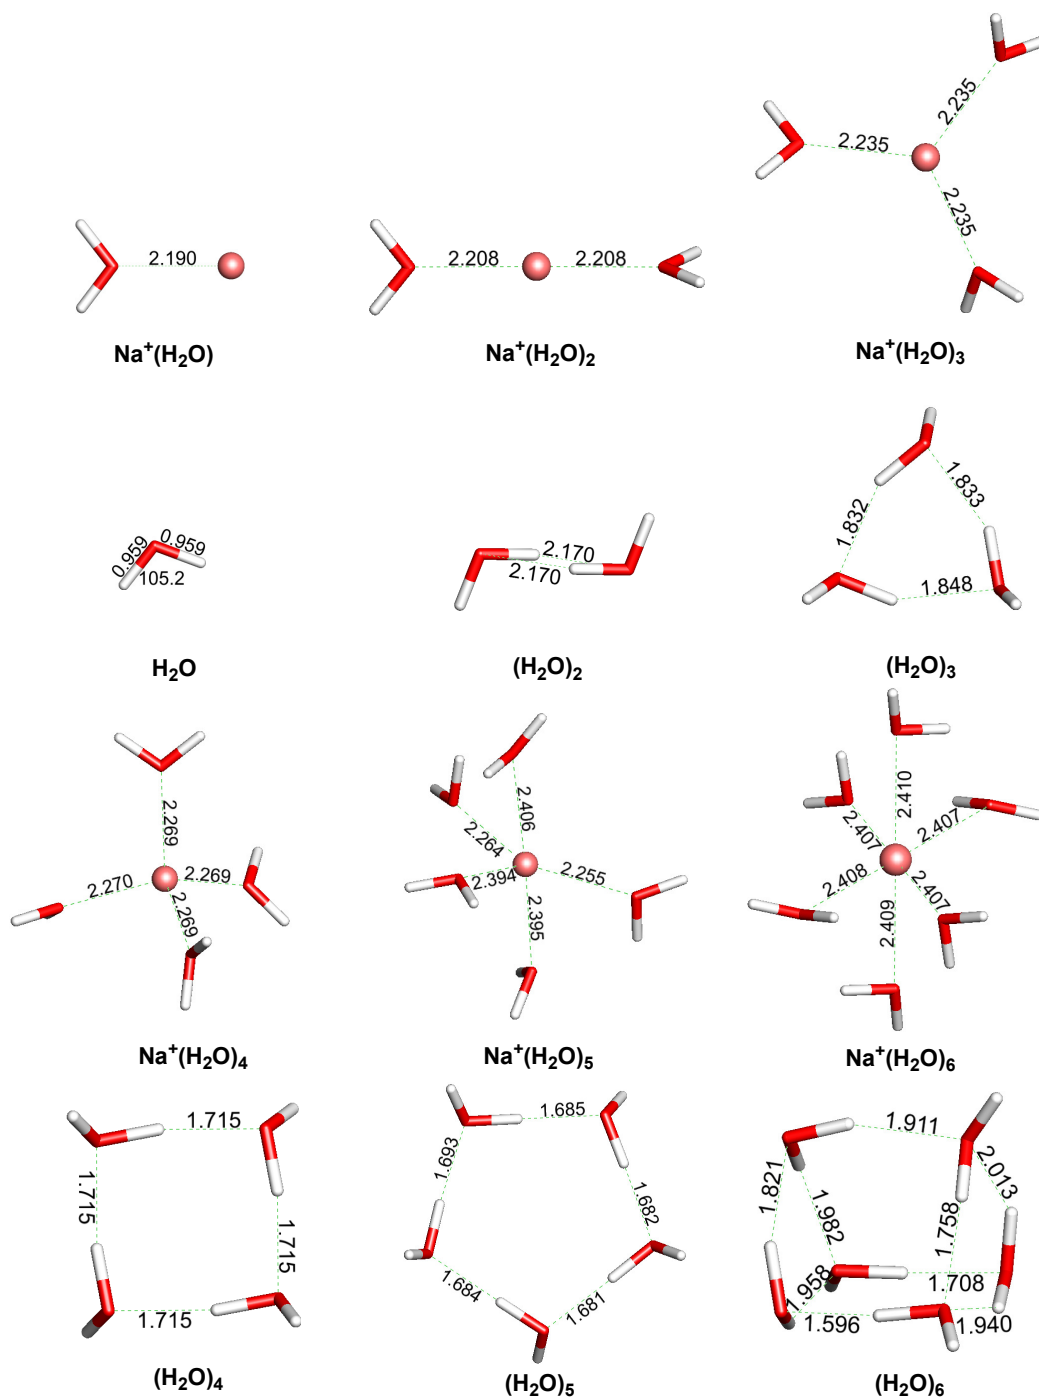

**Scheme S2.** Optimized geometries of  $\text{Na}^+(\text{H}_2\text{O})_n$  and  $(\text{H}_2\text{O})_n$  ( $n = 1-6$ ) clusters. The arrangement of  $\text{Na}^+(\text{H}_2\text{O})_n$  ( $n = 1-6$ ) clusters were based on the report by Rempe and co-workers (J. Chem. Theory Comput. 2015, 11, 2958). The arrangement of  $(\text{H}_2\text{O})_n$  ( $n = 1-6$ ) clusters were chosen from the lowest energy isomer from the study by Shields and co-workers (J. Phys. Chem. A 2011, 115, 12034).

**Table S1** Calculated solvation free energies of  $\text{Na}^+$  using the thermodynamic cycle in Scheme S1.

|                       | Solvation free energies, kcal/mol |       |       |       |       |       |       | Exp. <sup>a</sup> |
|-----------------------|-----------------------------------|-------|-------|-------|-------|-------|-------|-------------------|
|                       | n = 0                             | n = 1 | n = 2 | n = 3 | n = 4 | n = 5 | n = 6 |                   |
| <b>Na<sup>+</sup></b> | -70.5                             | -76.0 | -81.0 | -88.4 | -87.2 | -89.3 | -92.0 | -87.6             |

<sup>a</sup>Taken from ref. 6.

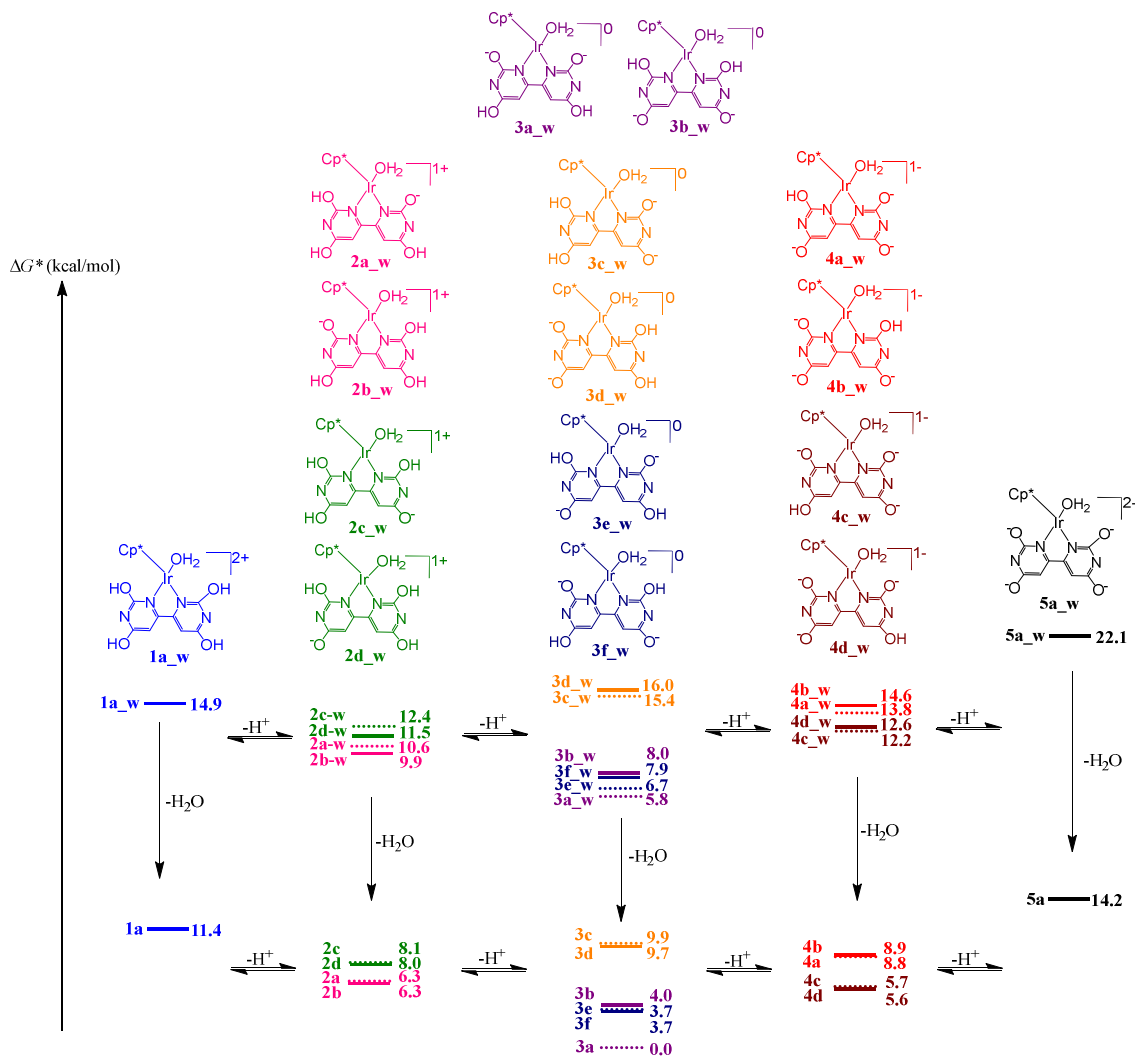

**Fig. S1** Relative free energies (in kcal/mol) at pH 3.5 of  $[\text{IrCp}^*(\text{H}_2\text{O})(\text{bpymO}_4\text{H}_n)]^{n-2}$  ( $n = 0, 1, 2, 3, \text{ and } 4$ ) with respect to  $3\mathbf{a} + \text{H}_2\text{O}$ .

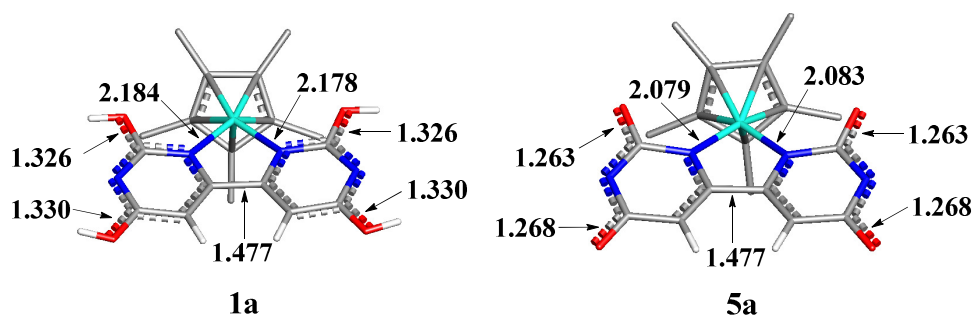

**Fig. S2** Optimized geometries for tetraprotic complex  $[\text{IrCp}^*(\text{bpymO}_4\text{H}_4)]^{2+}$  (**1a**) and fully deprotonated complex  $[\text{IrCp}^*(\text{bpymO}_4)]^{2-}$  (**5a**). Selected geometry parameters are shown in Å. Hydrogen atoms on Cp\* are omitted for clarity.

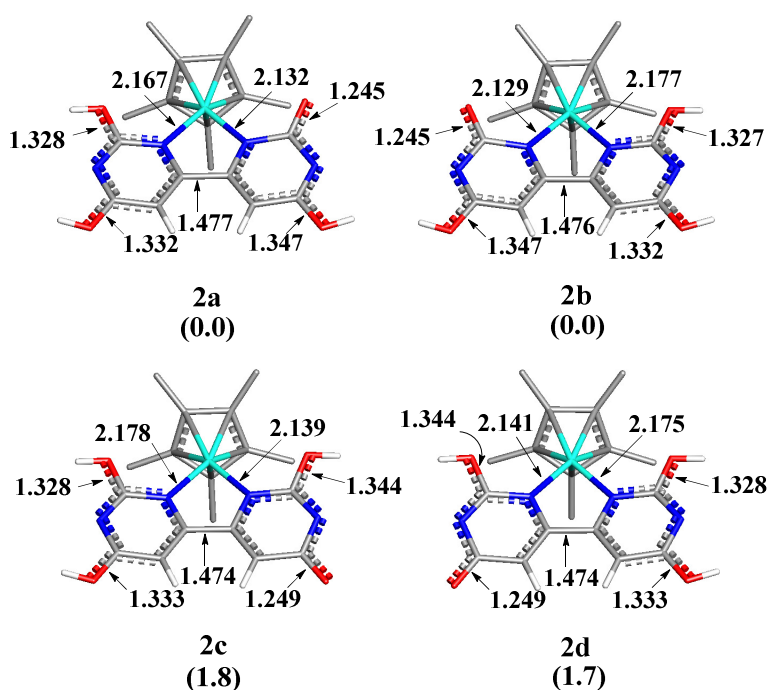

**Fig. S3** Optimized geometries and relative free energies (in kcal/mol) of triprotic complexes  $[\text{IrCp}^*(\text{bpymO}_4\text{H}_3)]^{1+}$  **2a**, **2b**, **2c**, and **2d**. Selected geometry parameters are shown in Å. Hydrogen atoms on Cp\* are omitted for clarity.



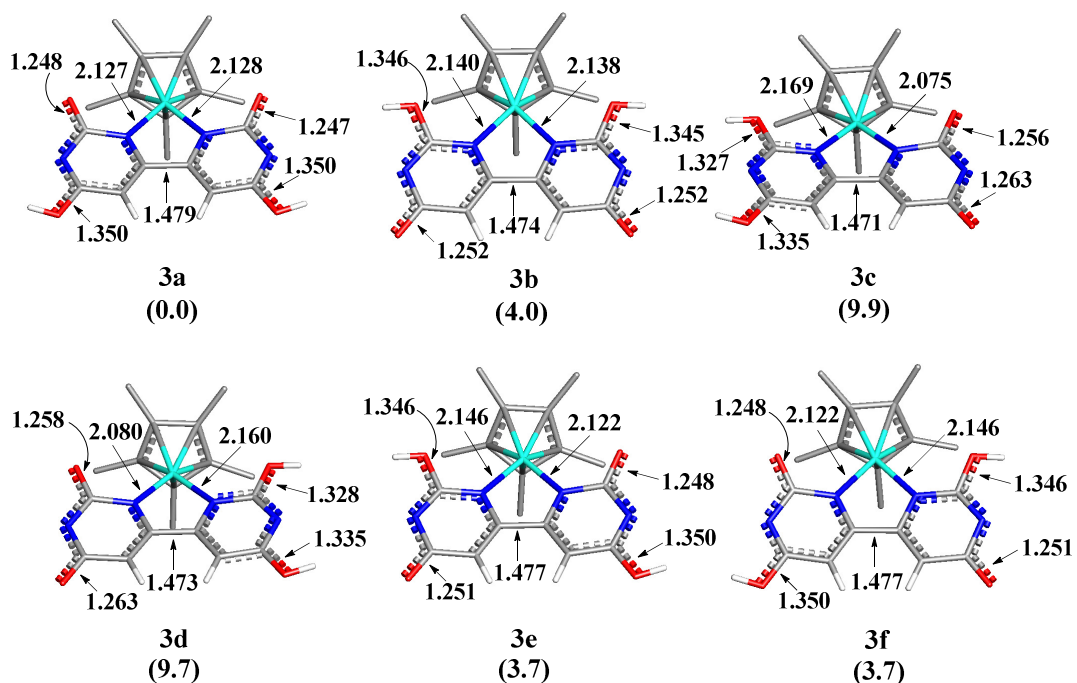

**Fig. S4** Optimized geometries and relative free energies (in kcal/mol) of diprotic complexes  $[\text{IrCp}^*(\text{bpy}\text{O}_4\text{H}_2)]^0$  **3a**, **3b**, **3c**, **3d**, **3e**, and **3f**. Selected geometry parameters are shown in Å. Hydrogen atoms on  $\text{Cp}^*$  are omitted for clarity.

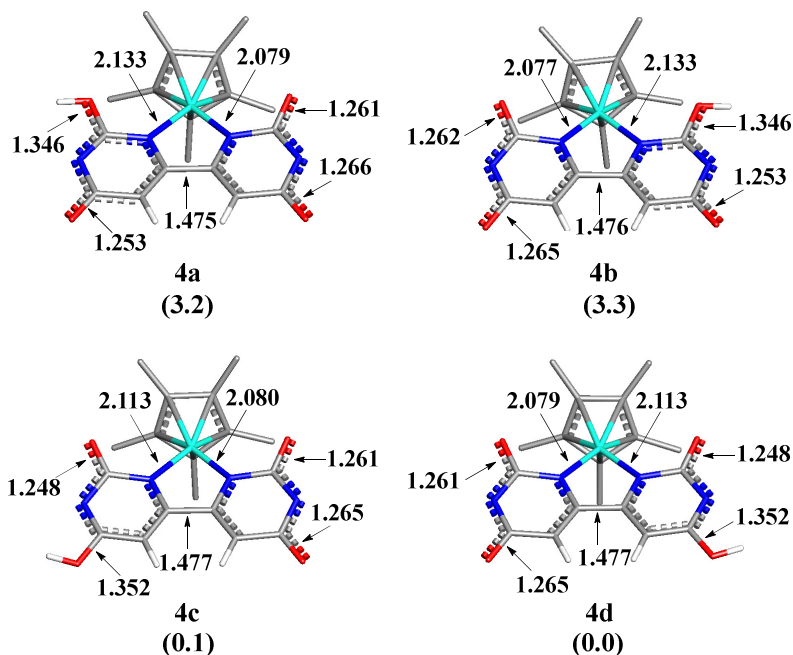

**Fig. S5** Optimized geometries and relative free energies (in kcal/mol) of monoprotic complexes  $[\text{IrCp}^*(\text{bpy}\text{O}_4\text{H})]^{-1}$  **4a**, **4b**, **4c**, and **4d**. Selected geometry parameters are shown in Å. Hydrogen atoms on  $\text{Cp}^*$  are omitted for clarity.

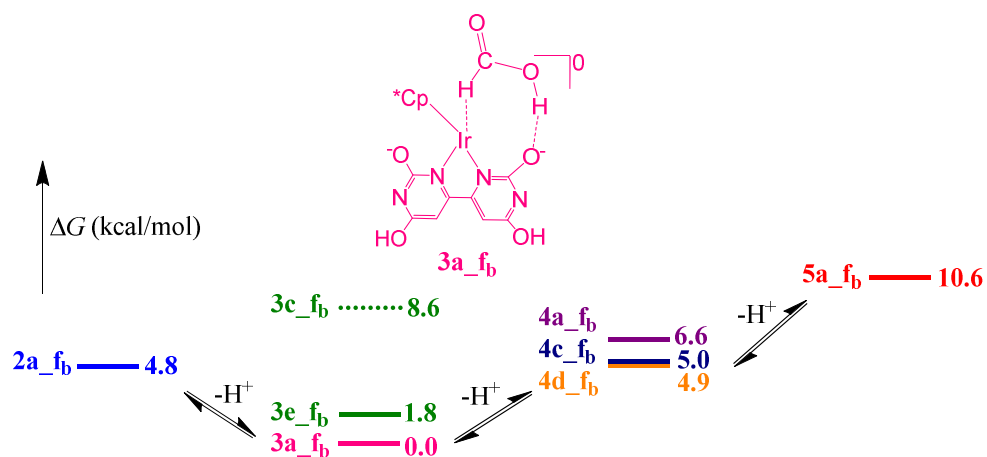

**Fig. S6** Relative free energies (in kcal/mol) at pH 3.5 of H-bound Ir-HCO<sub>2</sub>H complexes having the proton still residing on the HCO<sub>2</sub>H moiety.

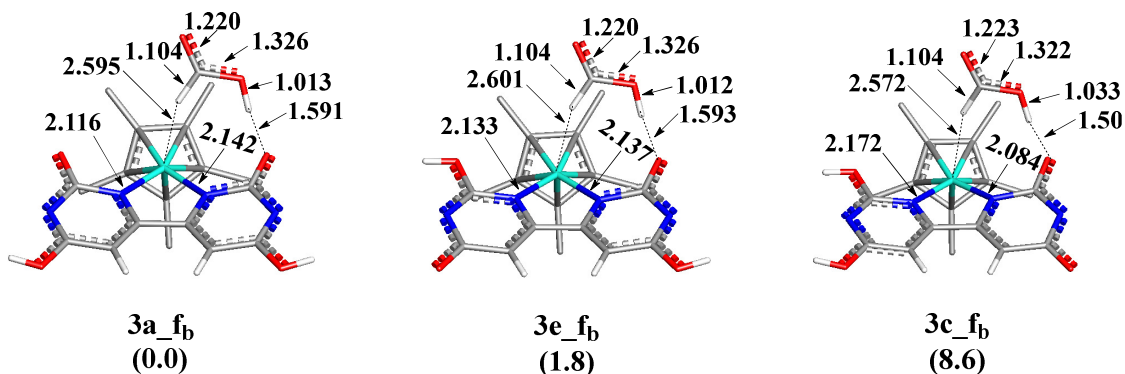

**Fig. S7** Optimized geometries and relative free energies (in kcal/mol) of H-bound Ir-HCO<sub>2</sub>H complexes 3a<sub>fb</sub>, 3e<sub>fb</sub>, and 3c<sub>fb</sub>. Selected geometry parameters are shown in Å. Hydrogen atoms on Cp\* are omitted for clarity.

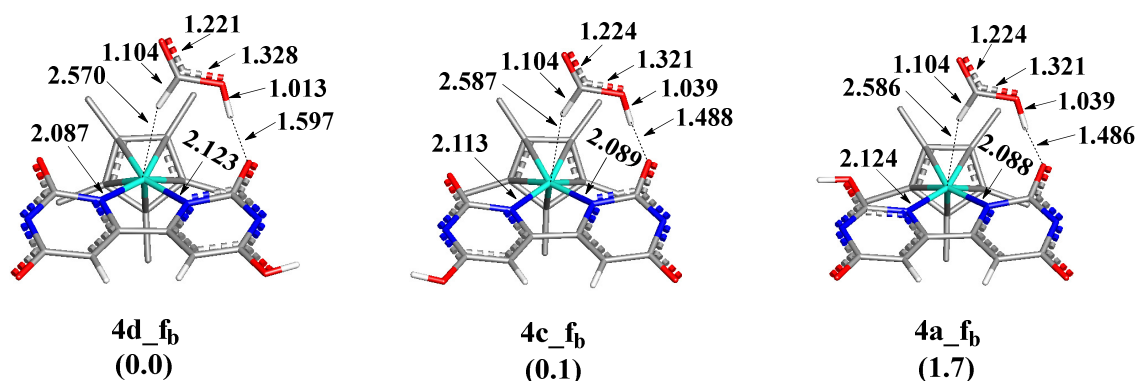

**Fig. S8** Optimized geometries and relative free energies (in kcal/mol) of H-bound Ir-HCO<sub>2</sub>H complexes 4d<sub>fb</sub>, 4c<sub>fb</sub>, and 4a<sub>fb</sub>. Selected geometry parameters are shown in Å. Hydrogen atoms on Cp\* are omitted for clarity.

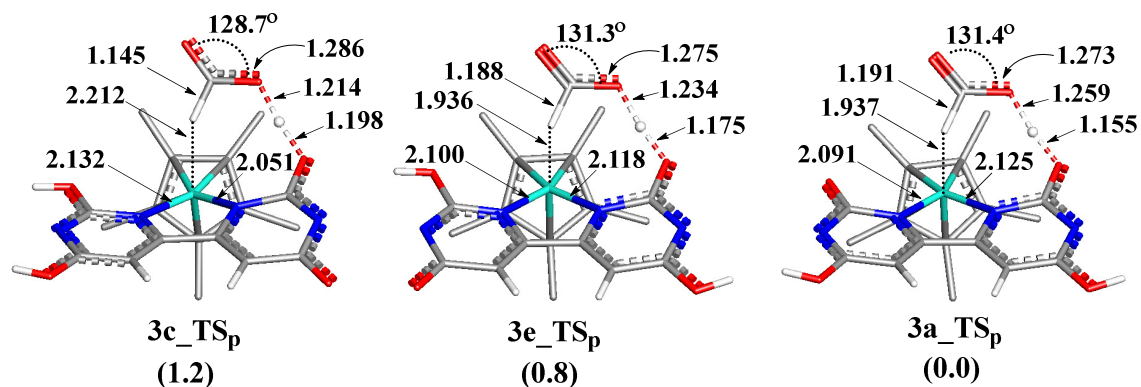

**Fig. S9** Optimized geometries and relative free energies (in kcal/mol) of transition states 3c\_TS<sub>p</sub>, 3e\_TS<sub>p</sub>, and 3a\_TS<sub>p</sub> for proton transfer from HCO<sub>2</sub>H to the pendant O<sup>-</sup> of the bipyrimidine ligand.

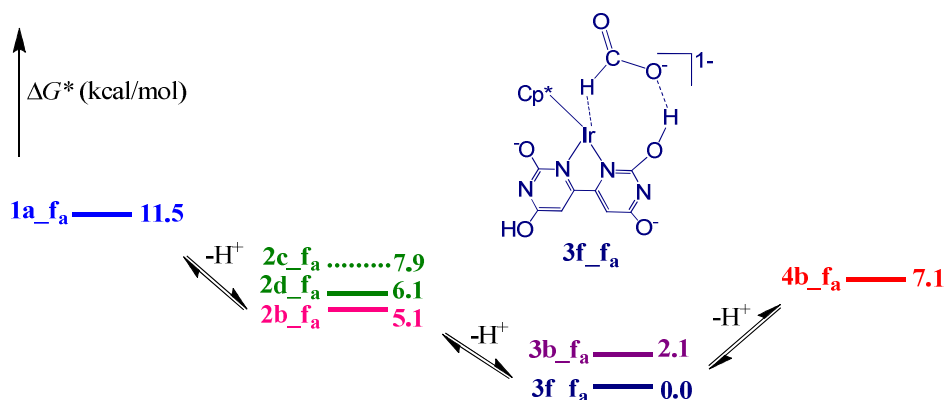

**Fig. S10** Relative free energies of Ir-HCO<sub>2</sub><sup>H</sup> (in kcal/mol) at pH 3.5, in which the HCO<sub>2</sub> moiety forms a hydrogen bond with the pendant OH on the bipyrimidine ligand.

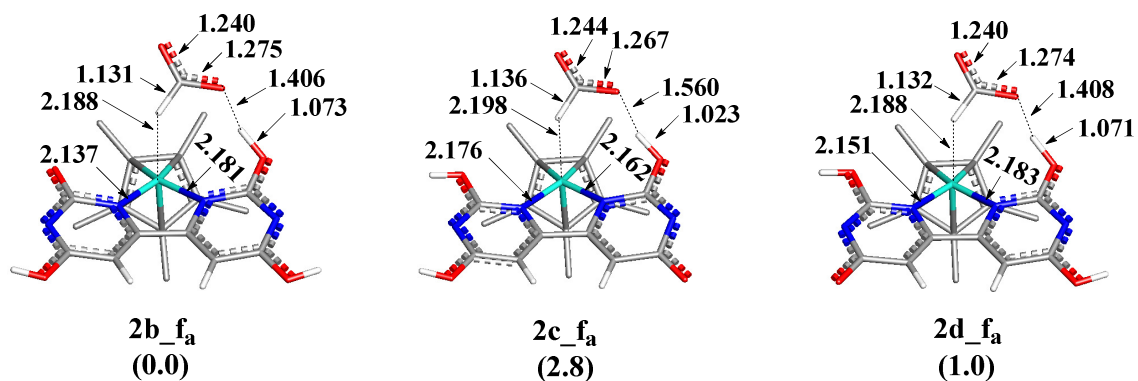

**Fig. S11** Optimized geometries and relative free energies (in kcal/mol) of H-bound Ir-HCO<sub>2</sub><sup>H</sup> complexes 2b<sub>fa</sub>, 2d<sub>fa</sub>, and 2c<sub>fa</sub>. Selected geometry parameters are shown in Å. Hydrogen atoms on Cp\* are omitted for clarity.

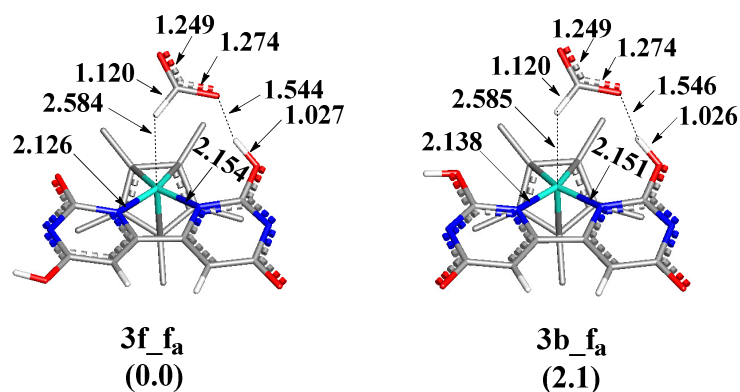

**Fig. S12** Optimized geometries and relative free energies (kcal/mol) of H-bound Ir-HCO<sub>2</sub><sup>H</sup> complexes **3f<sub>f<sub>a</sub></sub>** and **3b<sub>f<sub>a</sub></sub>**. Selected geometry parameters are shown in Å. Hydrogen atoms on Cp\* are omitted for clarity.

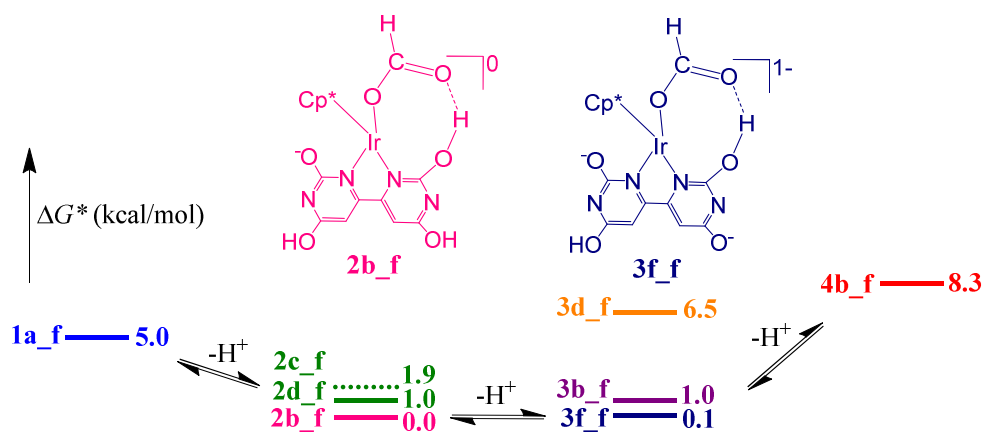

**Fig. S13** Relative free energies of Ir-OCHO<sup>H</sup> (in kcal/mol) at pH 3.5, in which the HCO<sub>2</sub> moiety forms a hydrogen bond with the pendant OH on the bipyrimidine ligand.

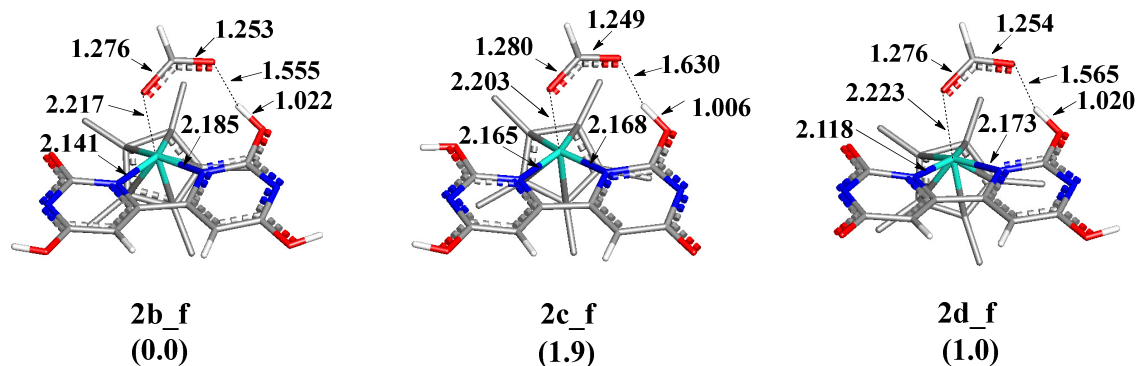

**Fig. S14** Optimized geometries and relative free energies (in kcal/mol) of Ir-OCHO<sup>H</sup> complexes **2b<sub>f</sub>**, **2c<sub>f</sub>**, and **2d<sub>f</sub>**. Selected geometry parameters are shown in Å. Hydrogen atoms on Cp\* are omitted for clarity.

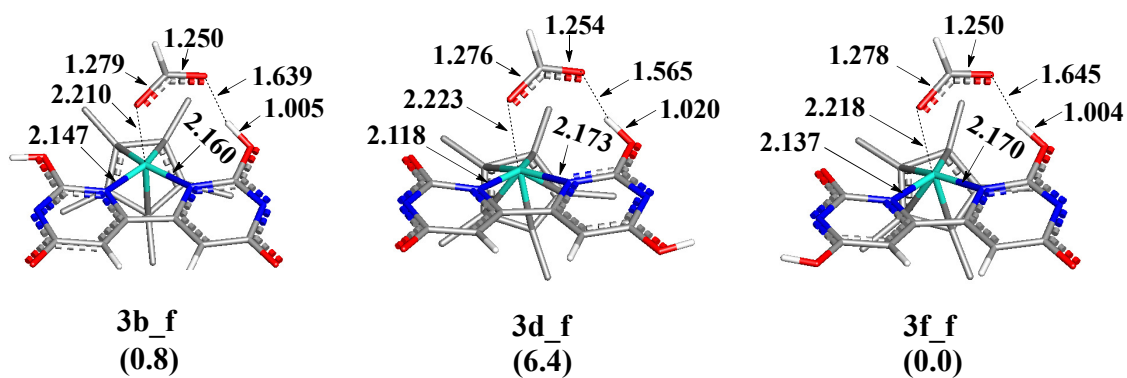

**Fig. S15** Optimized geometries and relative free energies (in kcal/mol) of Ir-OCHO<sup>H</sup> complexes **3b<sub>f</sub>**, **3d<sub>f</sub>**, and **3f<sub>f</sub>**. Selected geometry parameters are shown in Å. Hydrogen atoms on Cp\* are omitted for clarity.

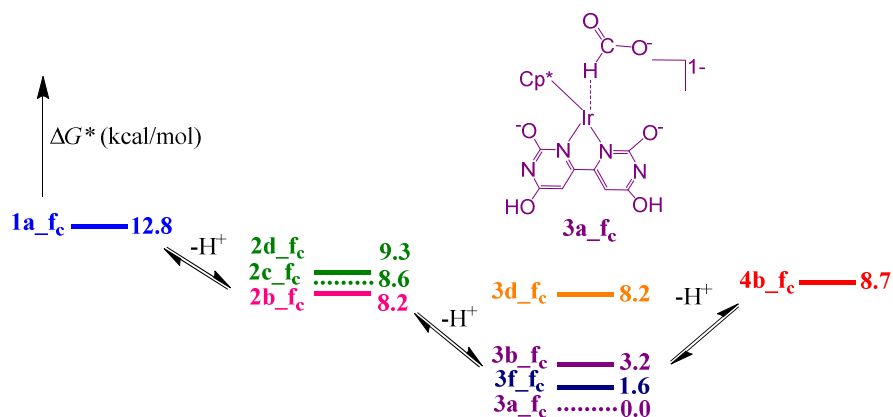

**Fig. S16** Relative free energies of H-bound Ir-HCO<sub>2</sub> (in kcal/mol) at pH 3.5, in which the hydrogen bond between the HCO<sub>2</sub> moiety and the pendant OH/O<sup>-</sup> on the bipyrimidine ligand is absent.

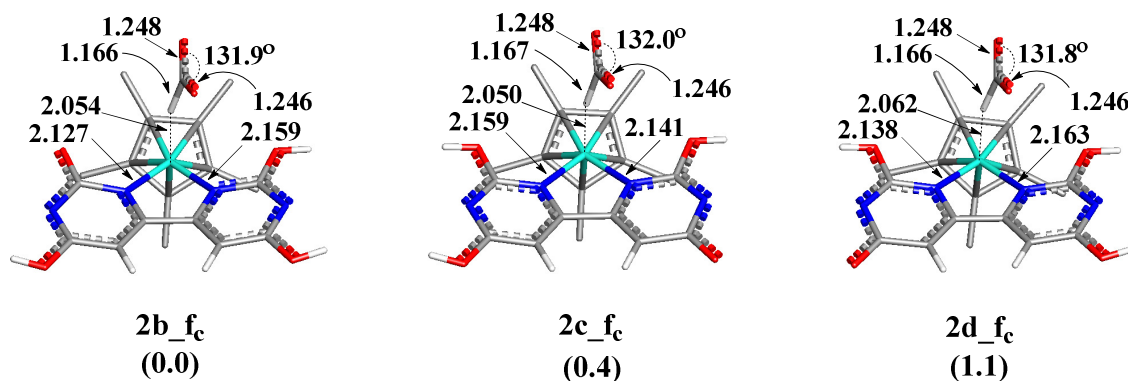

**Fig. S17** Optimized geometries and relative free energies (in kcal/mol) of H-bound Ir-HCO<sub>2</sub> complexes **2b<sub>fc</sub>**, **2c<sub>fc</sub>**, and **2d<sub>fc</sub>**. Selected geometry parameters are shown in Å. Hydrogen atoms on Cp\* are omitted for clarity.

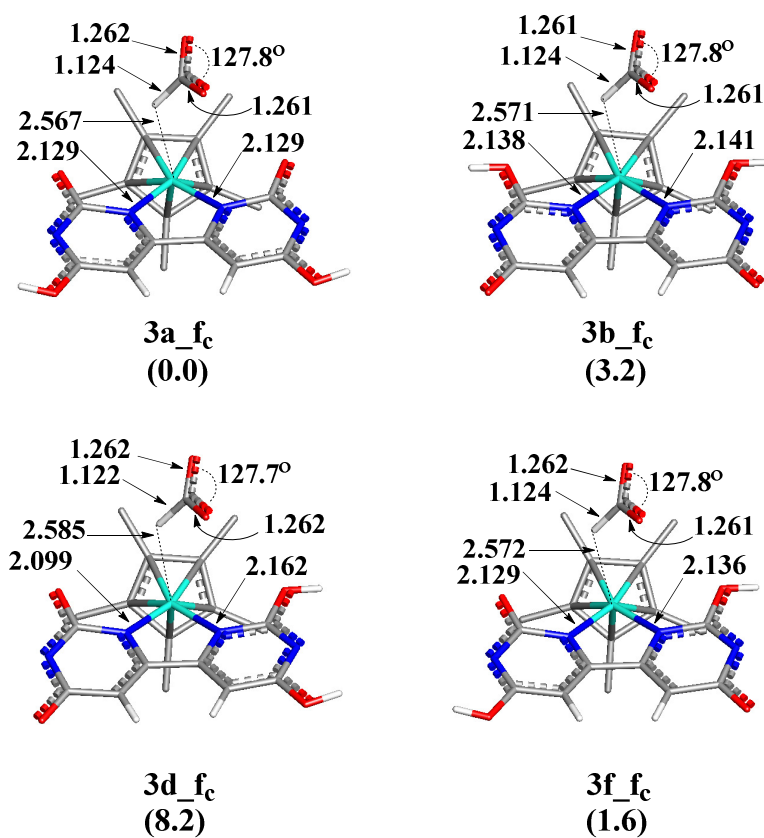

**Fig. S18** Optimized geometries and relative free energies (in kcal/mol) of H-bound Ir-HCO<sub>2</sub> complexes **3a<sub>fc</sub>**, **3b<sub>fc</sub>**, **3d<sub>fc</sub>** and **3f<sub>fc</sub>**. Selected geometry parameters are shown in Å. Hydrogen atoms on Cp\* are omitted for clarity.

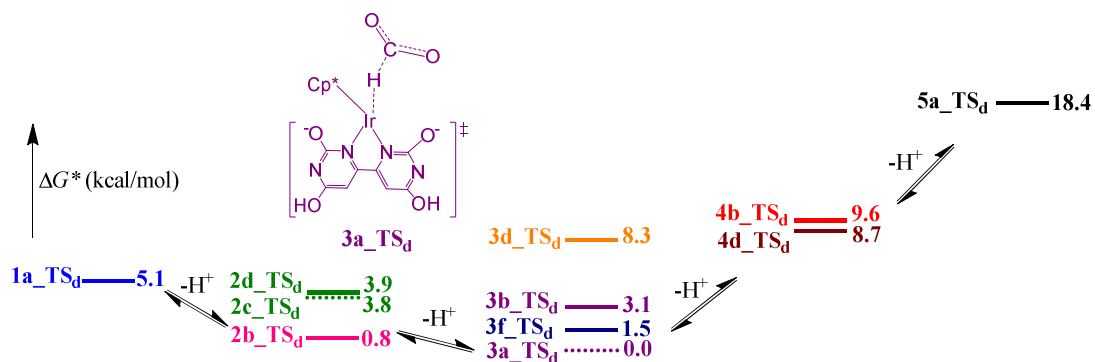

**Fig. S19** Relative free energies of transition states for direct hydride transfer (in kcal/mol) at pH 3.5.

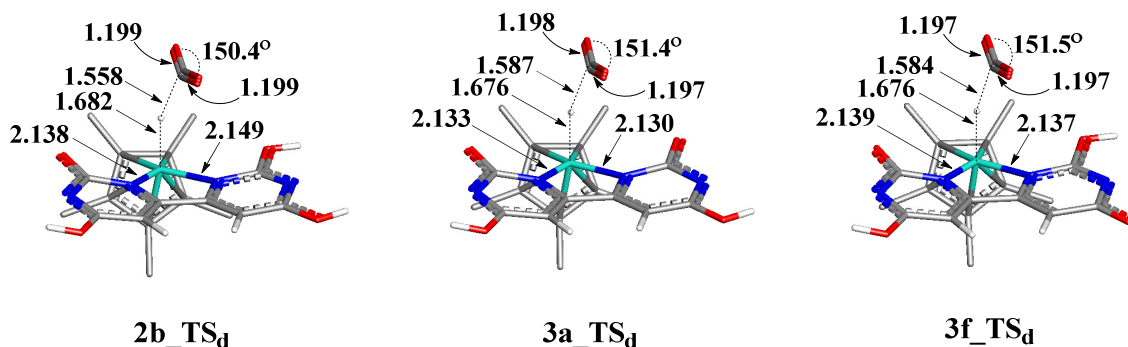

**Fig. S20** Optimized geometries of the transition states 2b\_TS<sub>d</sub>, 3a\_TS<sub>d</sub>, and 3f\_TS<sub>d</sub> for direct hydride transfer. Selected geometry parameters are shown in Å. Hydrogen atoms on Cp\* are omitted for clarity.

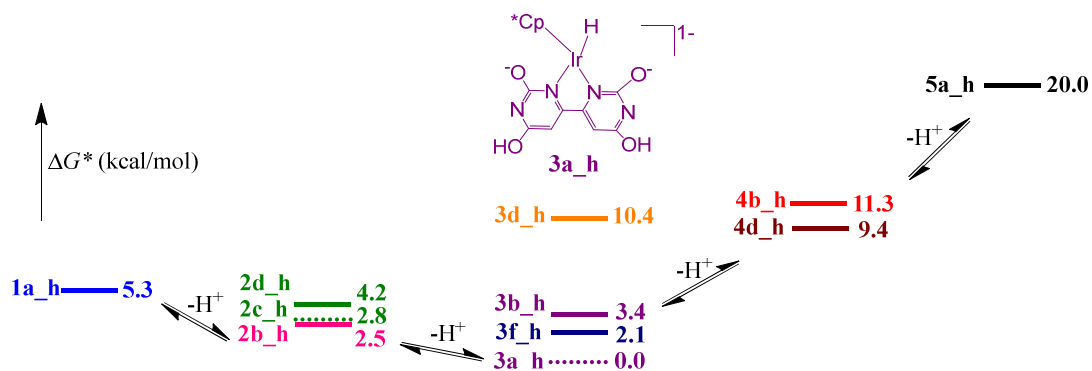

**Fig. S21** Relative free energies of Ir-H complexes (in kcal/mol) at pH 3.5.

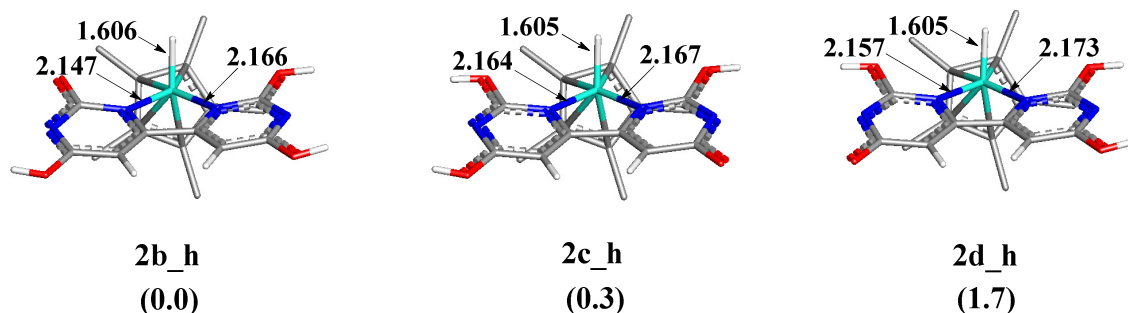

**Fig. S22** Optimized geometries and relative free energies (in kcal/mol) of Ir-H complexes 2b<sub>h</sub>, 2c<sub>h</sub>, and 2d<sub>h</sub>. Selected geometry parameters are shown in Å. Hydrogen atoms on Cp\* are omitted for clarity.

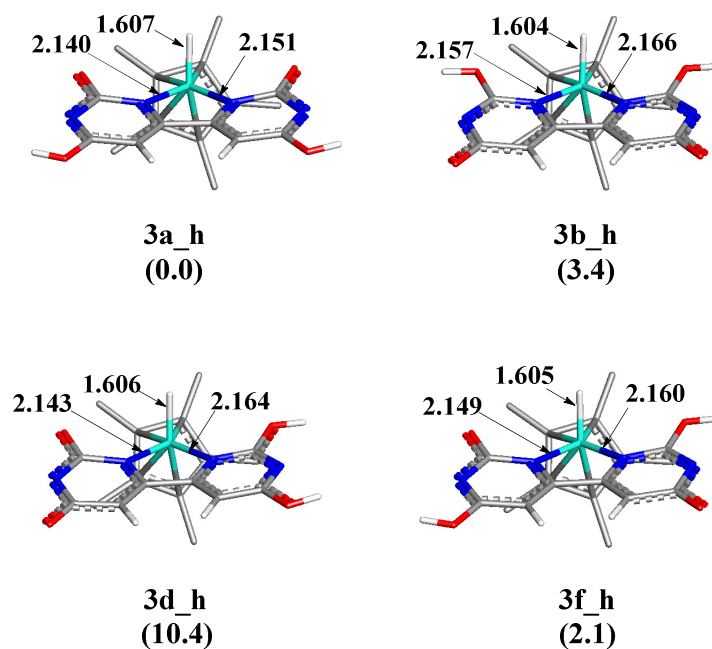

**Fig. S23** Optimized geometries and relative free energies (in kcal/mol) of Ir-H complexes **3a\_h**, **3b\_h**, **3d\_h** and **3f\_h**. Selected geometry parameters are shown in Å. Hydrogen atoms on Cp\* are omitted for clarity.

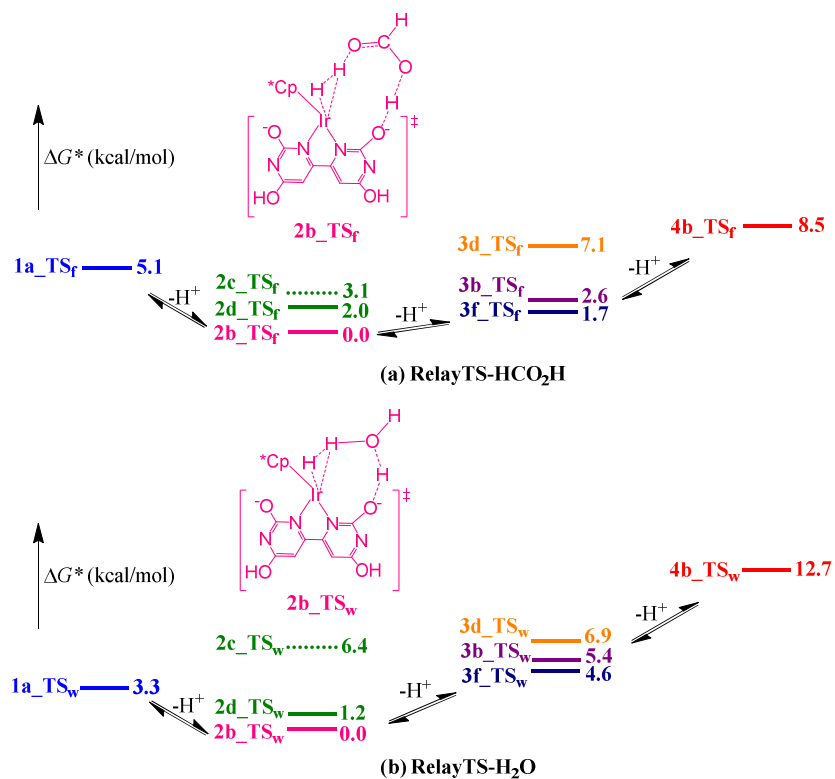

**Fig. S24** Relative free energies (in kcal/mol) at pH 3.5 of the transition states for H<sub>2</sub> formation using (a) HCO<sub>2</sub>H as a proton shuttle and (b) H<sub>2</sub>O as a proton shuttle.



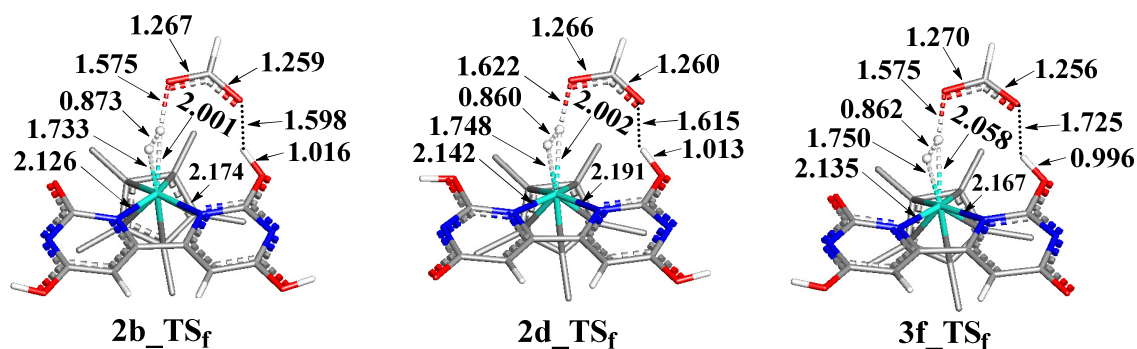

**Fig. S25** Optimized geometries of the transition states for H<sub>2</sub> formation using HCO<sub>2</sub>H as a proton shuttle: **2b\_TS<sub>f</sub>**, **2d\_TS<sub>f</sub>**, and **3f\_TS<sub>f</sub>**. Selected geometry parameters are shown in Å.

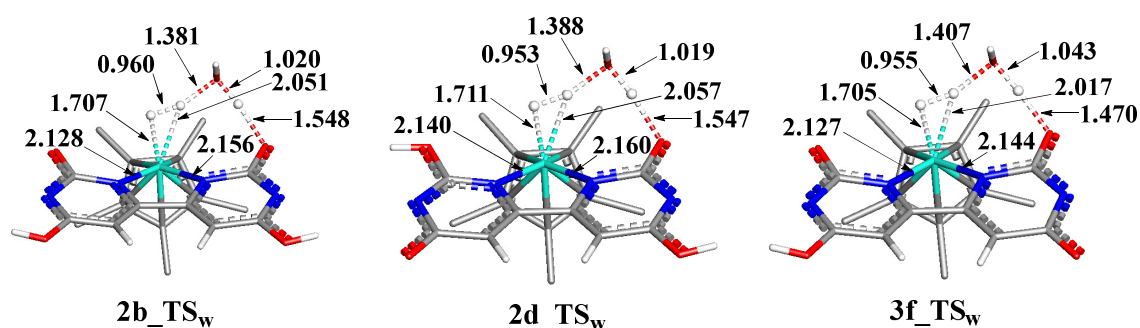

**Fig. S26** Optimized geometries of the transition states for H<sub>2</sub> formation using H<sub>2</sub>O as a proton shuttle: **2b\_TS<sub>w</sub>**, **2d\_TS<sub>w</sub>**, and **3f\_TS<sub>w</sub>**. Selected geometry parameters are shown in Å.

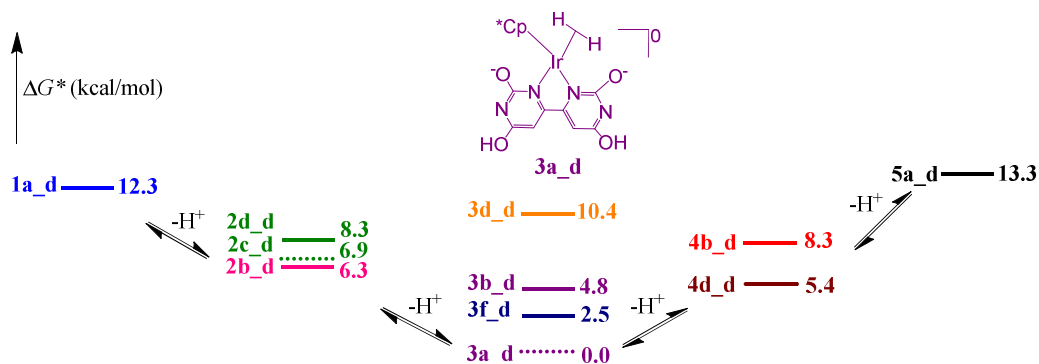

**Fig. S27** Relative free energies of Ir-H<sub>2</sub> complexes (in kcal/mol) at pH 3.5.



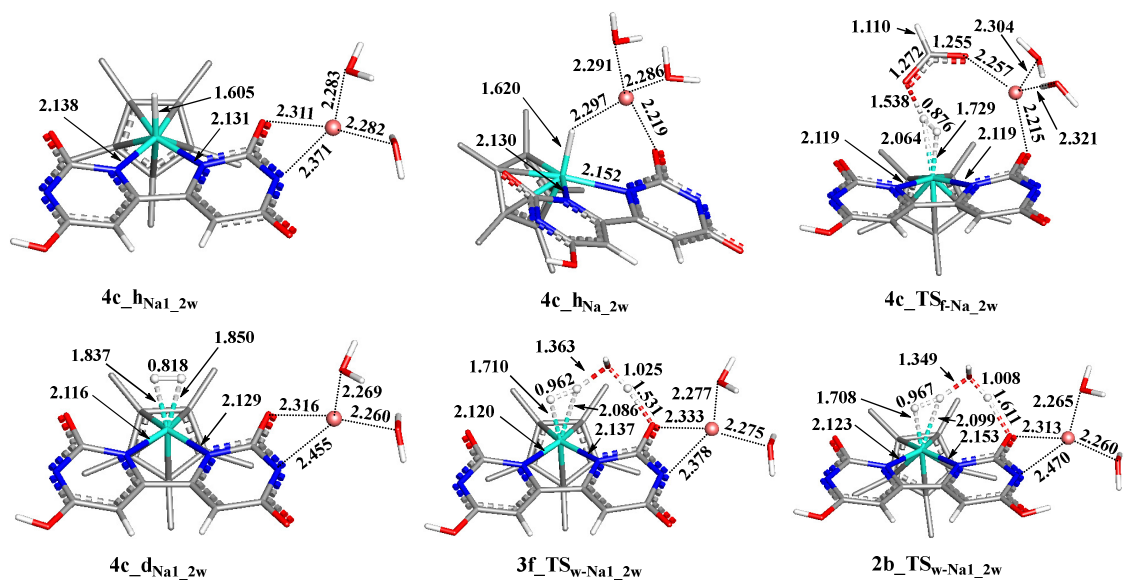

**Fig. S30** Optimized geometries of intermediates and transition states for Na<sup>+</sup> mediated H<sub>2</sub> formation in formic acid dehydrogenation by complex C. Selected geometry parameters are shown in Å and °.

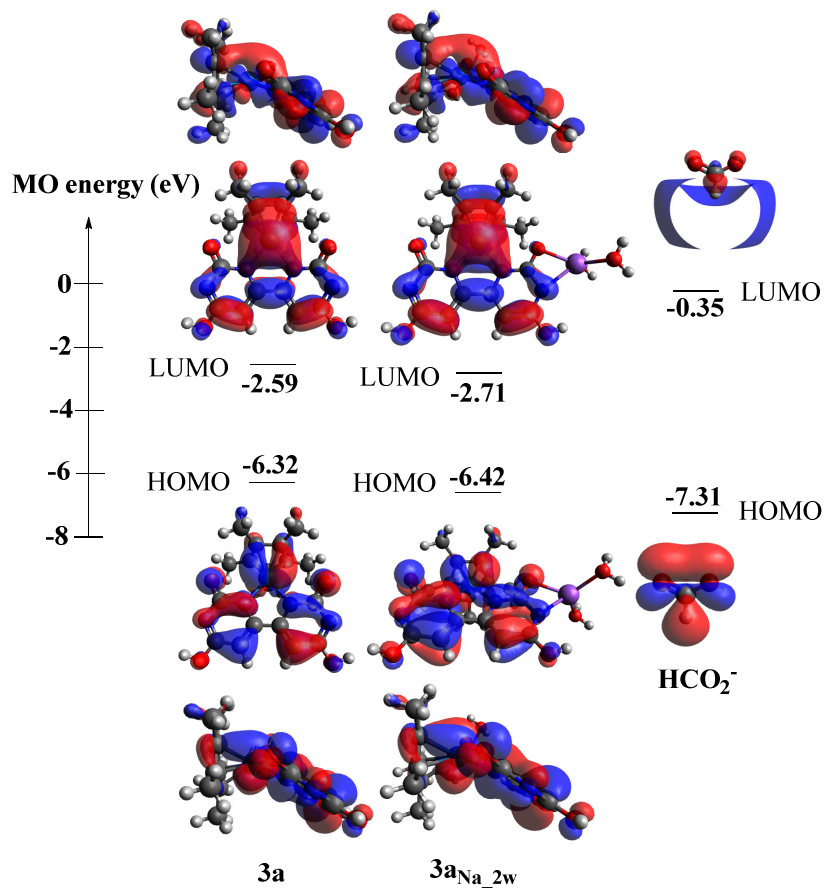

**Fig. S31** Selected molecular orbitals (MOs) and MO energies of **3a**, **3aNa<sub>2w</sub>**, and HCO<sub>2</sub><sup>-</sup>.

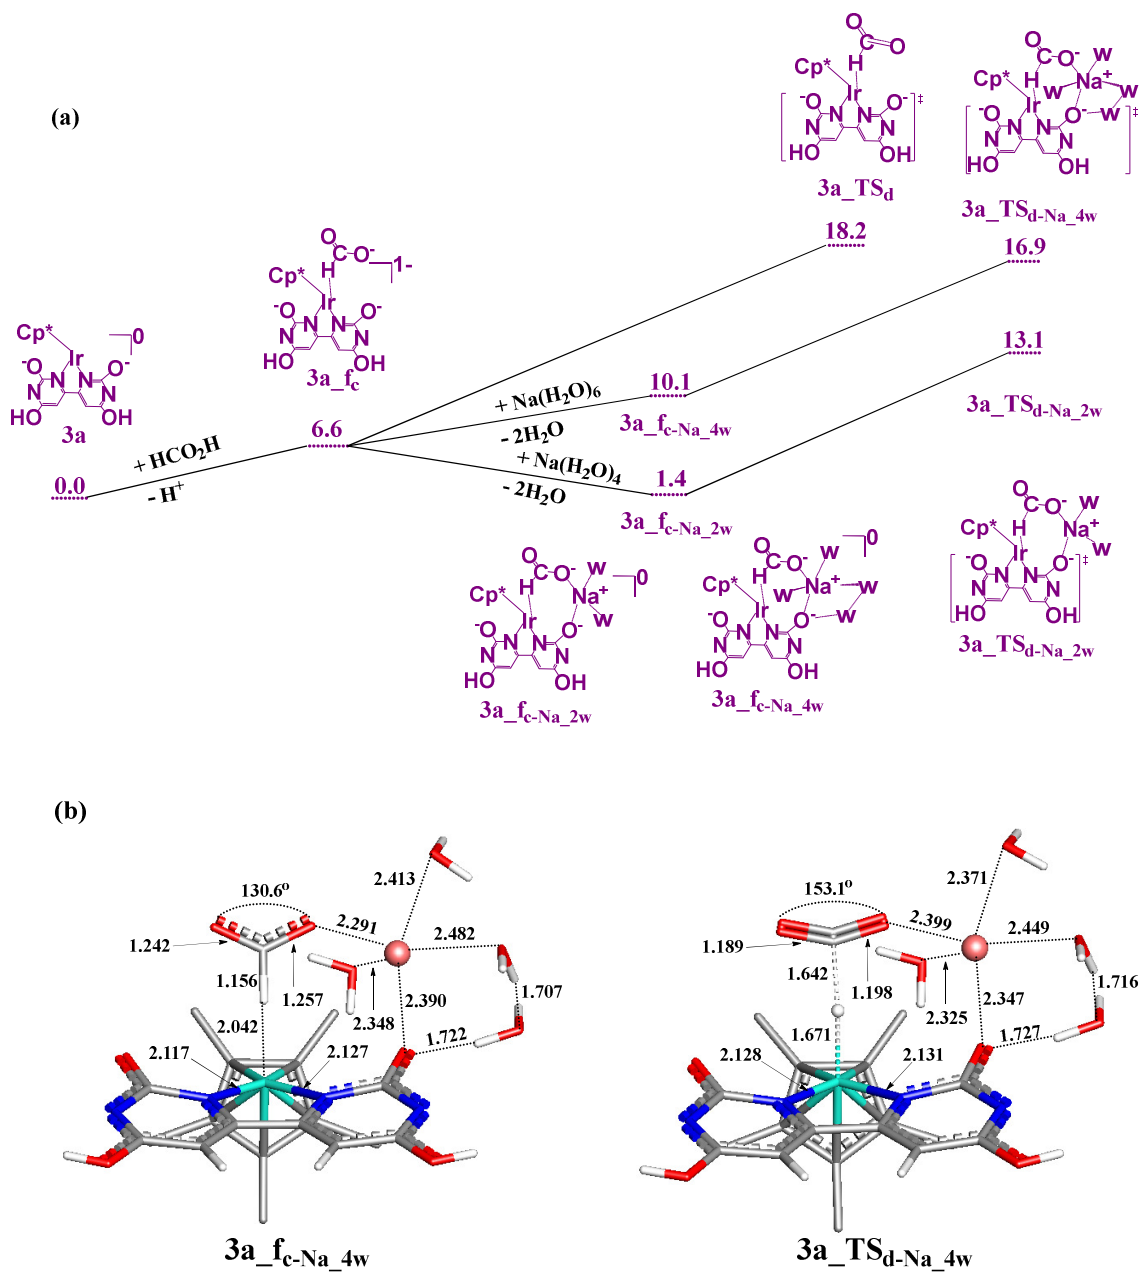

**Fig. S32** (a) Free energy profile (in kcal/mol) at pH 3.5 of the hydride transfer via **3a<sub>TSd</sub>** and the Na<sup>+</sup> mediated hydride transfer via **3a<sub>TSd-Na<sub>4w</sub></sub>** and **3a<sub>TSd-Na<sub>2w</sub></sub>**. A water molecule coordinated to Na<sup>+</sup> is labeled as w for clarity (w = H<sub>2</sub>O). (b) Optimized geometries of **3a<sub>fc-Na<sub>4w</sub></sub>** and **3a<sub>TSd-Na<sub>4w</sub></sub>**. Selected optimized geometry parameters are shown in Å and °.

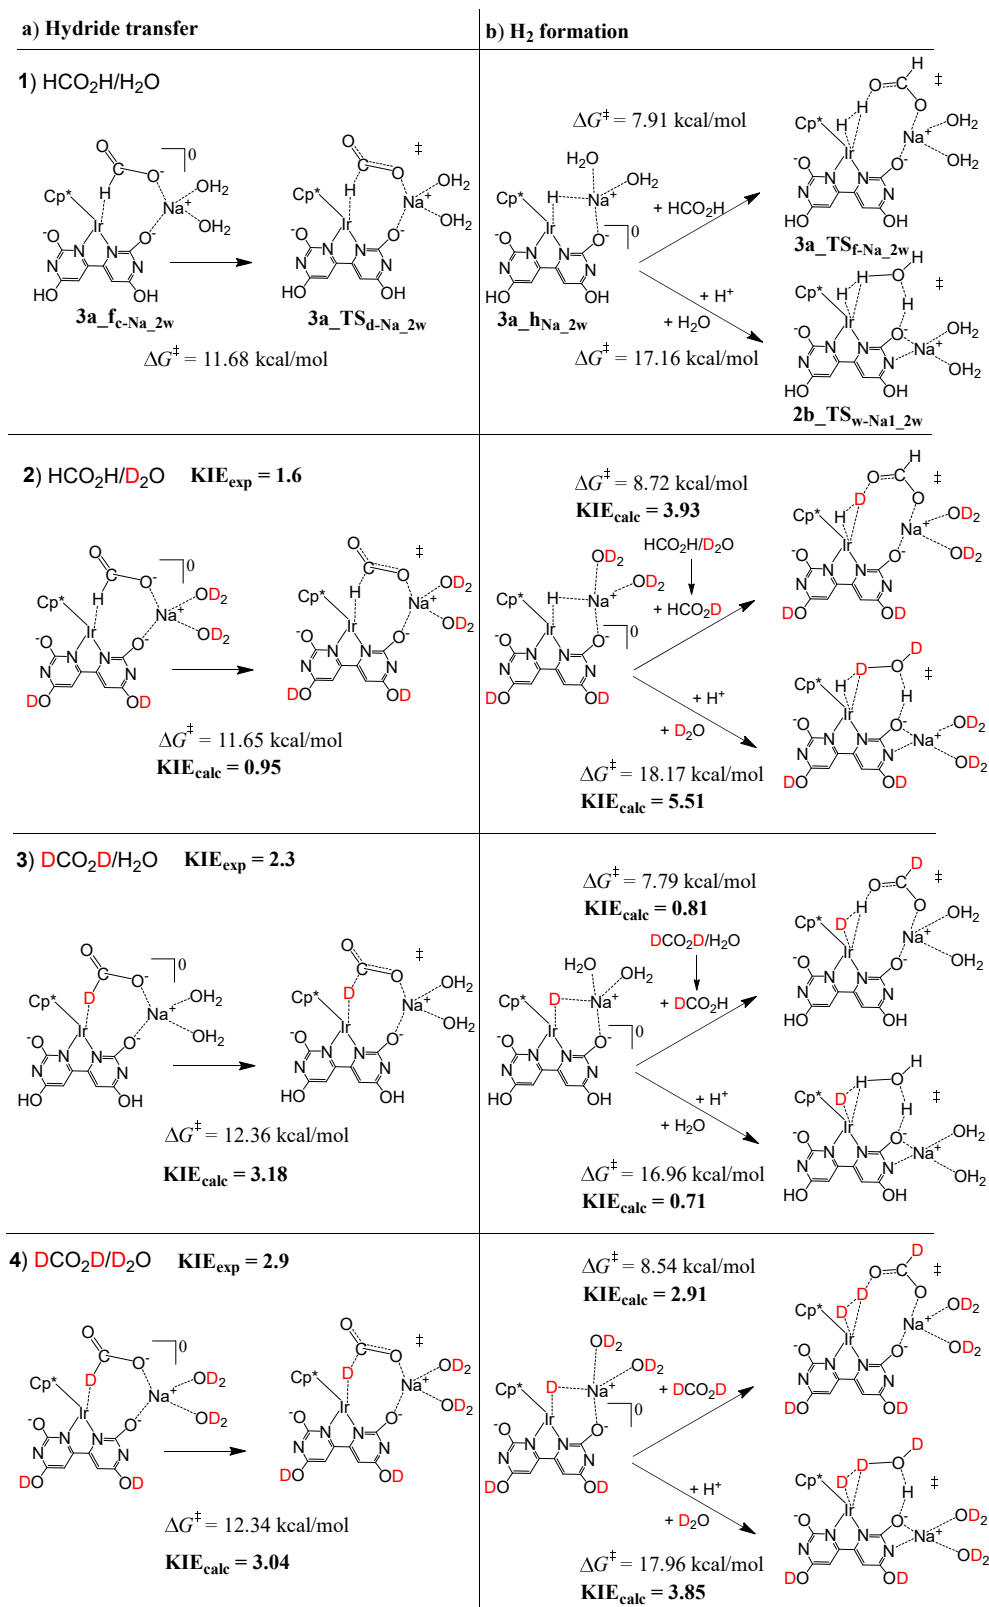

**Fig. S33** Relative free energy ( $\Delta G^\ddagger$ ) and kinetic isotope effects (KIE) in Na<sup>+</sup> mediated formic acid dehydrogenation at pH 3.5: (a) hydride transfer and (b) H<sub>2</sub> formation. KIE<sub>exp</sub> was taken from reference <sup>7</sup>. KIE<sub>calc</sub> was calculated from  $k_H/k_D$  i.e.,  $e^{(\Delta G^\ddagger(D) - \Delta G^\ddagger(H))/RT}$ .

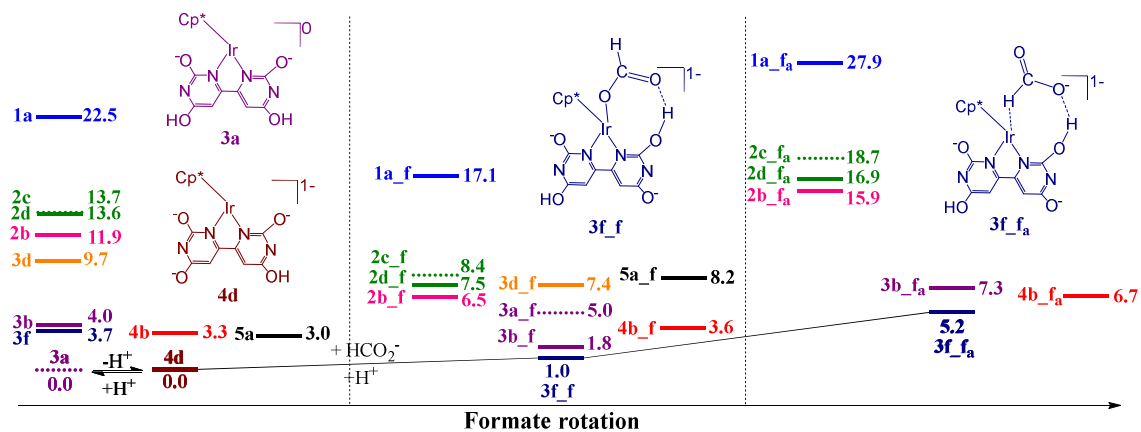

**Fig. S34** Relative free energy profile (in kcal/mol) at pH 7.6 for the binding of HCO<sub>2</sub>H to [Ir(Cp\*)(bpymO<sub>4</sub>H<sub>2</sub>)]<sup>2-</sup> **3a** to form O-bound Ir-OCHO<sup>H</sup> and H-bound Ir-HCO<sub>2</sub><sup>H</sup> complexes.

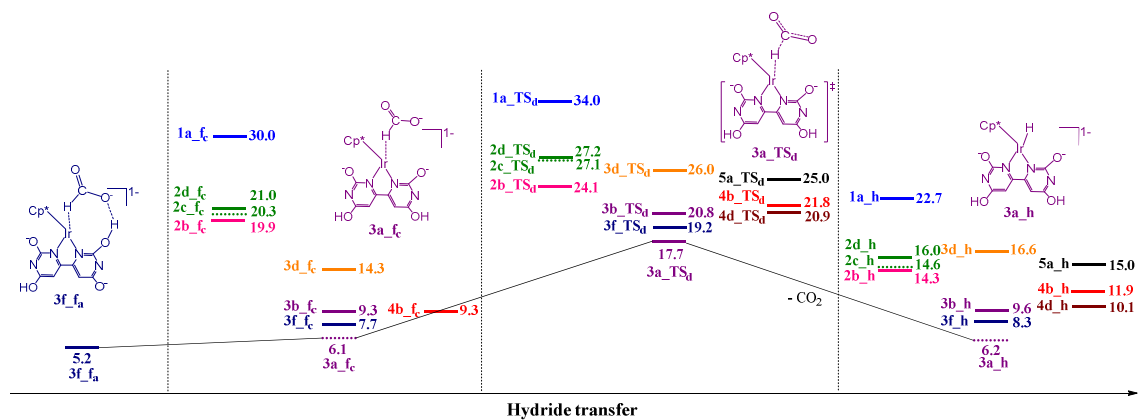

**Fig. S35** Relative free energy profile (in kcal/mol) at pH 7.6 for direct hydride transfer.

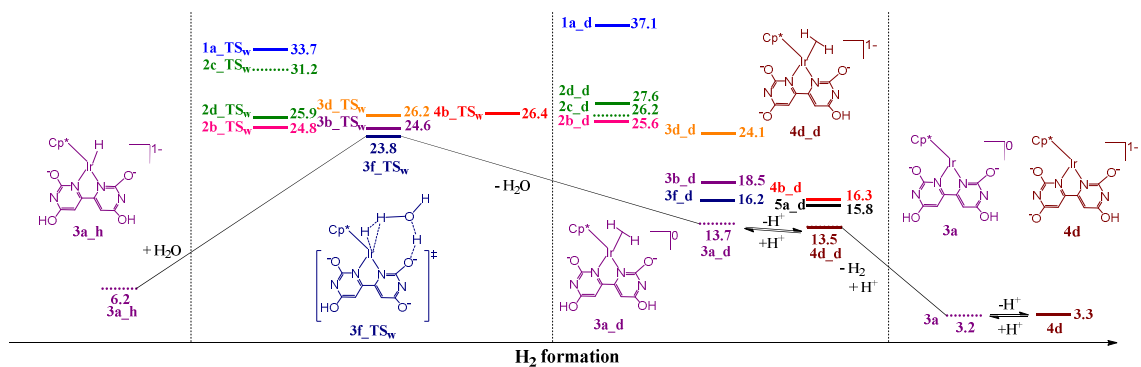

**Fig. S36** Relative free energy profile (in kcal/mol) at pH 7.6 for H<sub>2</sub> formation *via* a water proton shuttle.



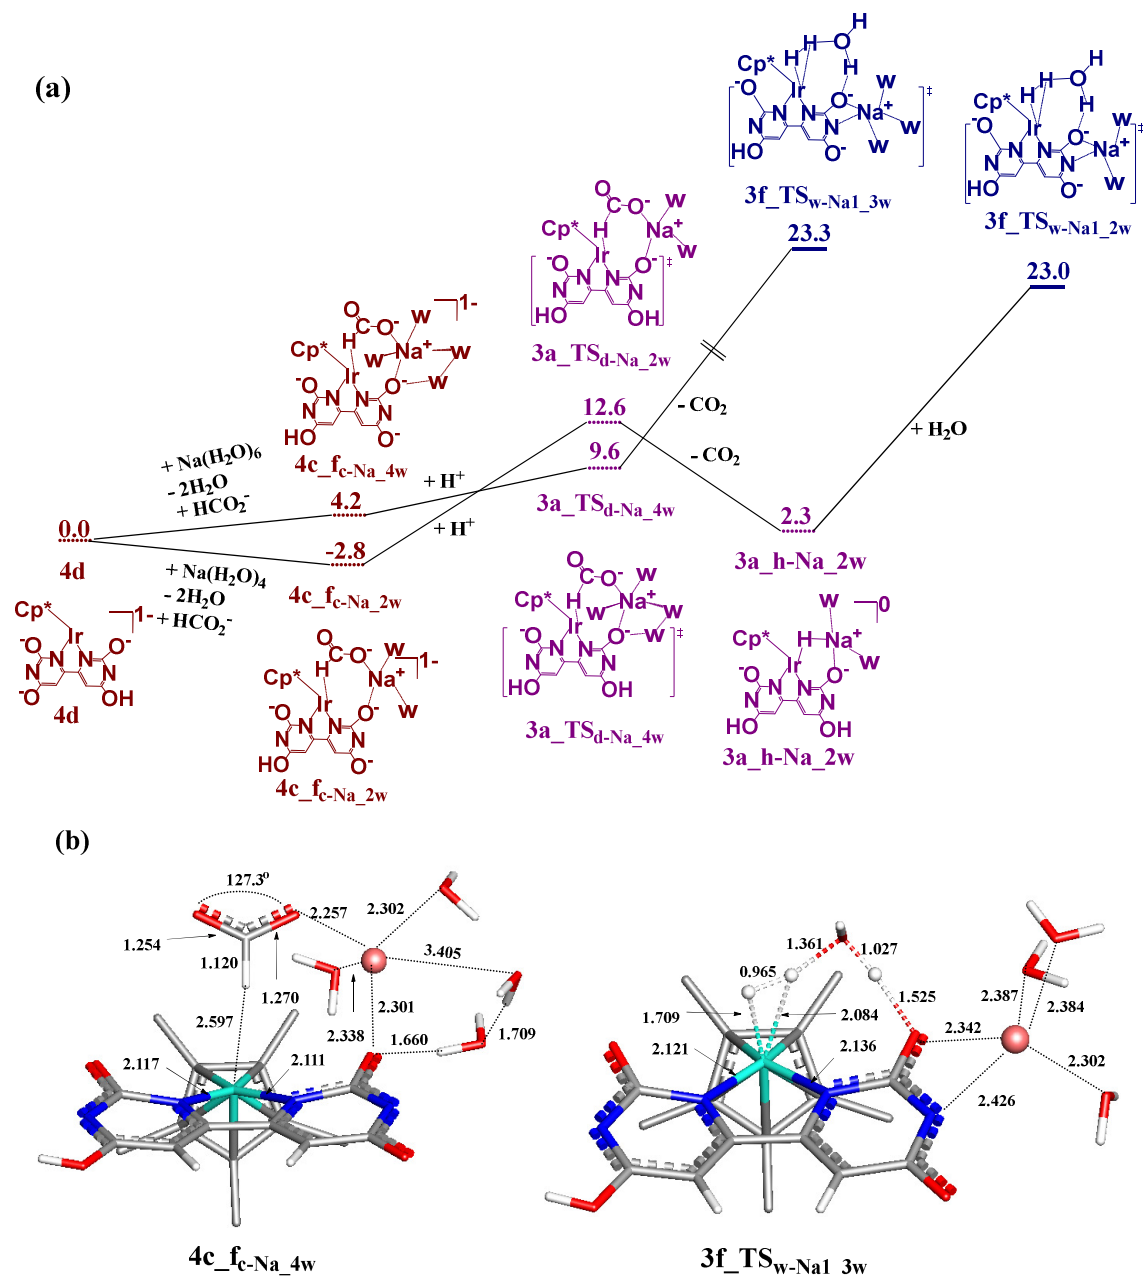

**Fig. S38** (a) Free energy profile (in kcal/mol) at pH 7.6 of the  $\text{Na}^+$  mediated  $\text{H}_2$  formation via  $3f\_TS_{w-Na1\_2w}$  and  $3f\_TS_{w-Na1\_3w}$ . A water molecule coordinated to  $\text{Na}^+$  is labeled as w for clarity ( $w = \text{H}_2\text{O}$ ). (b) Optimized geometries of  $4c\_fc-Na\_4w$  and  $3f\_TS_{w-Na1\_3w}$ . Selected optimized geometry parameters are shown in Å and °.



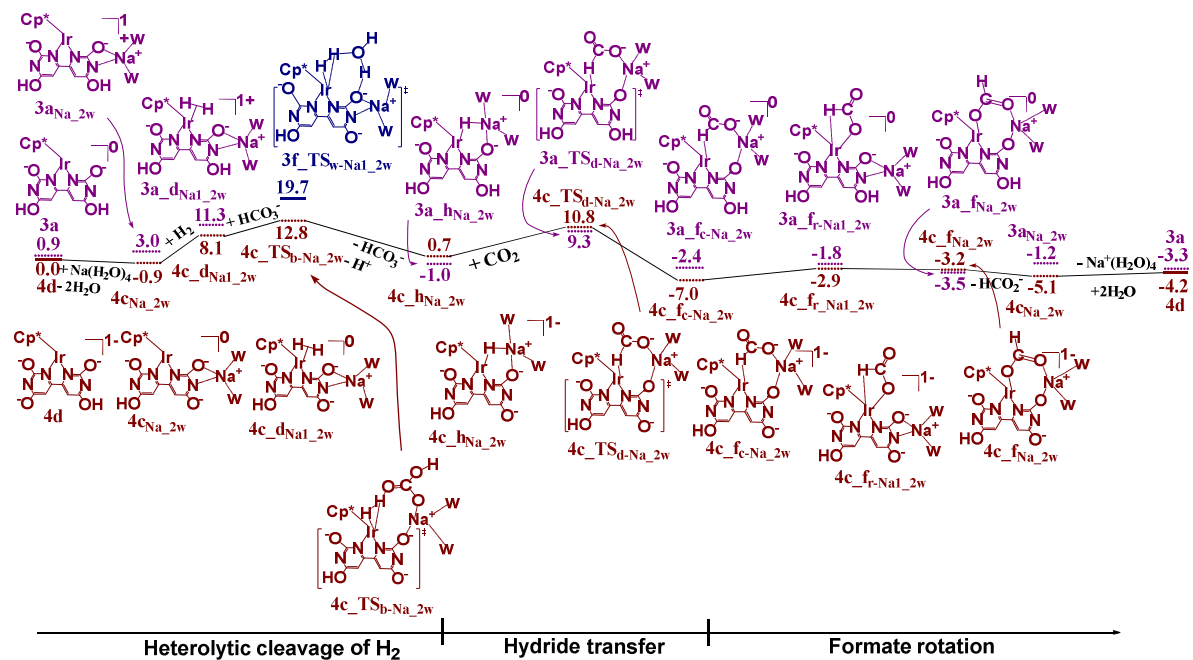

**Fig. S39** Overall free energy profile (in kcal/mol) at pH 8.3 of Na<sup>+</sup> mediated CO<sub>2</sub> hydrogenation by complex C. A water molecule coordinated to Na<sup>+</sup> is labeled as w for clarity (w = H<sub>2</sub>O).

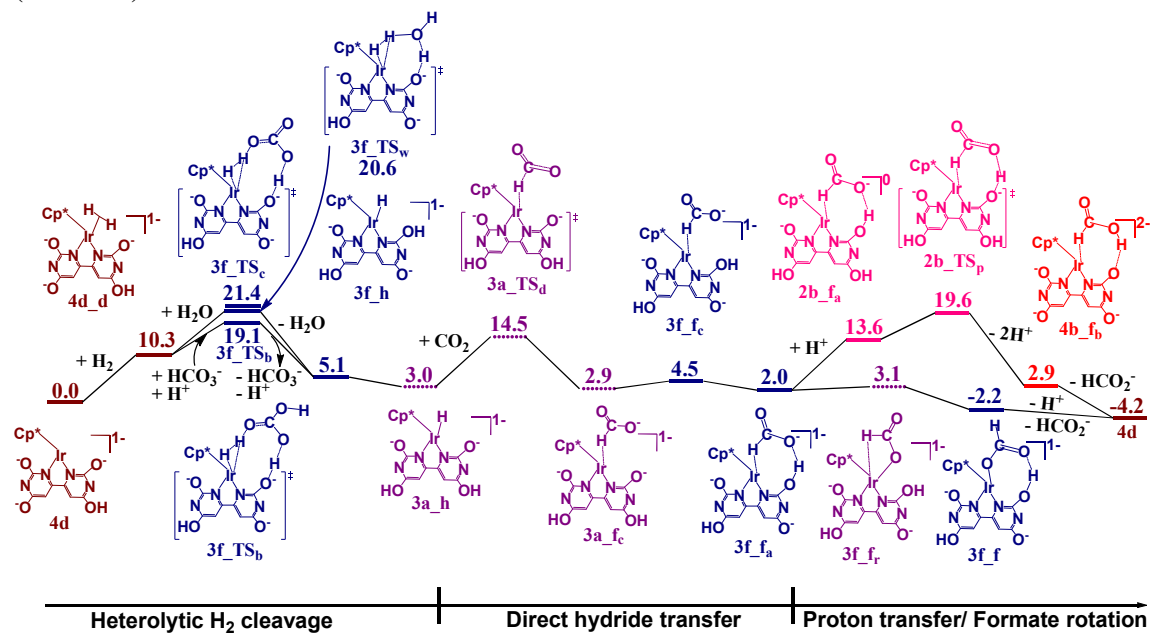

**Fig. S40** Overall free energy profile (in kcal/mol) at pH 8.3 of CO<sub>2</sub> hydrogenation by complex C, in the absence of Na<sup>+</sup>.

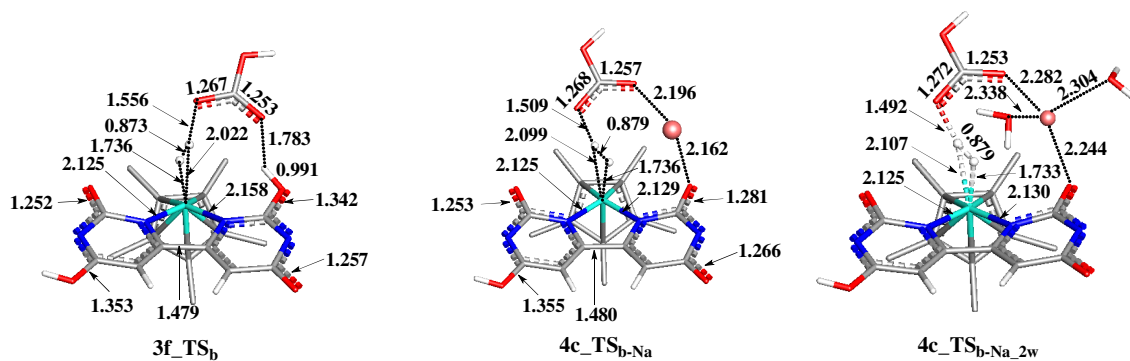

**Fig. S41** Optimized geometries of transition states for H<sub>2</sub> heterolytic cleavage in CO<sub>2</sub> hydrogenation by complex C. Selected geometry parameters are shown in Å and °.

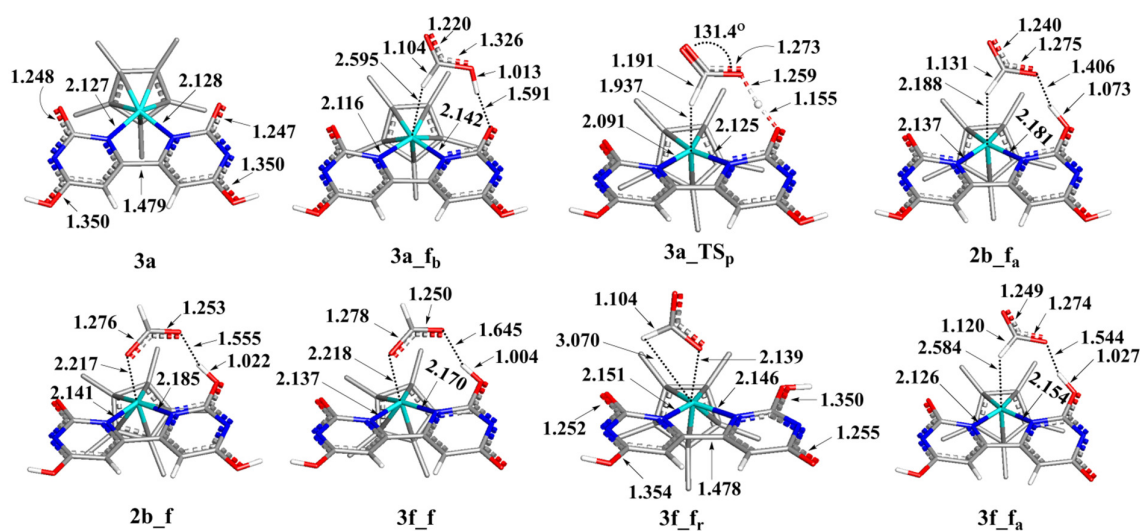

**Fig. S42** Optimized geometries of the intermediates and transition states for the formation of Ir-HCO<sub>2</sub>H, Ir-HCO<sub>2</sub><sup>H</sup>, and Ir-OCHO<sup>H</sup> complexes. Selected geometry parameters are shown in Å.

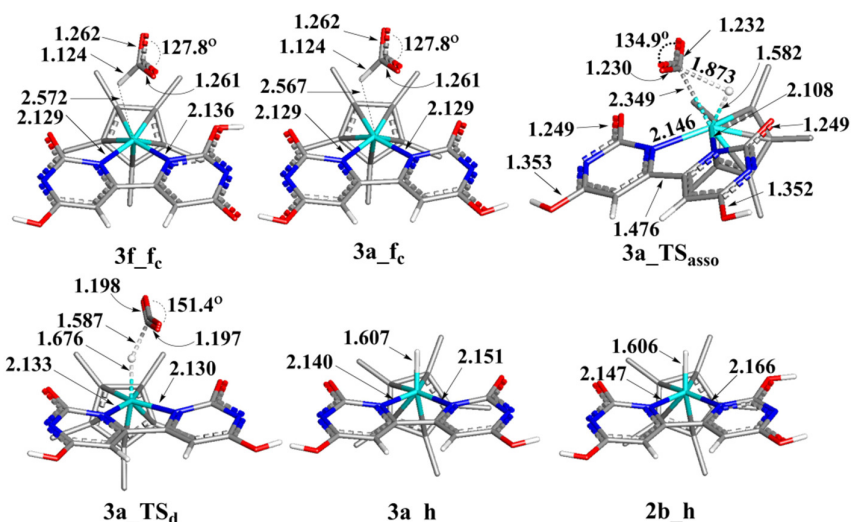

**Fig. S43** Optimized geometries of intermediates and transition states for direct hydride transfer from HCO<sub>2</sub> to generate Ir-H complexes: **3f<sub>fc</sub>**, **3a<sub>fc</sub>**, **3a<sub>TS\_asso</sub>**, **3a<sub>TS\_d</sub>**, **3a<sub>h</sub>**, and **2b<sub>h</sub>**. Selected geometry parameters are given in Å and °.

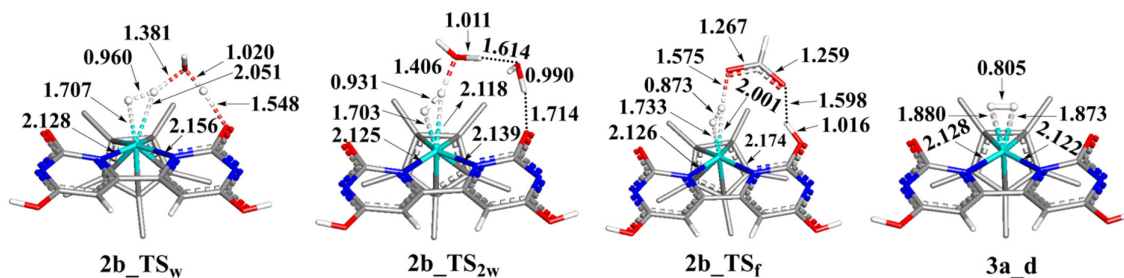

**Fig. S44** Optimized geometries of intermediates and transition states in H<sub>2</sub> formation via a proton shuttle pathway: **2b<sub>TS\_w</sub>**, **2b<sub>TS\_2w</sub>**, **2b<sub>TS\_f</sub>**, and **3a<sub>d</sub>**. Selected geometry parameters are shown in Å.

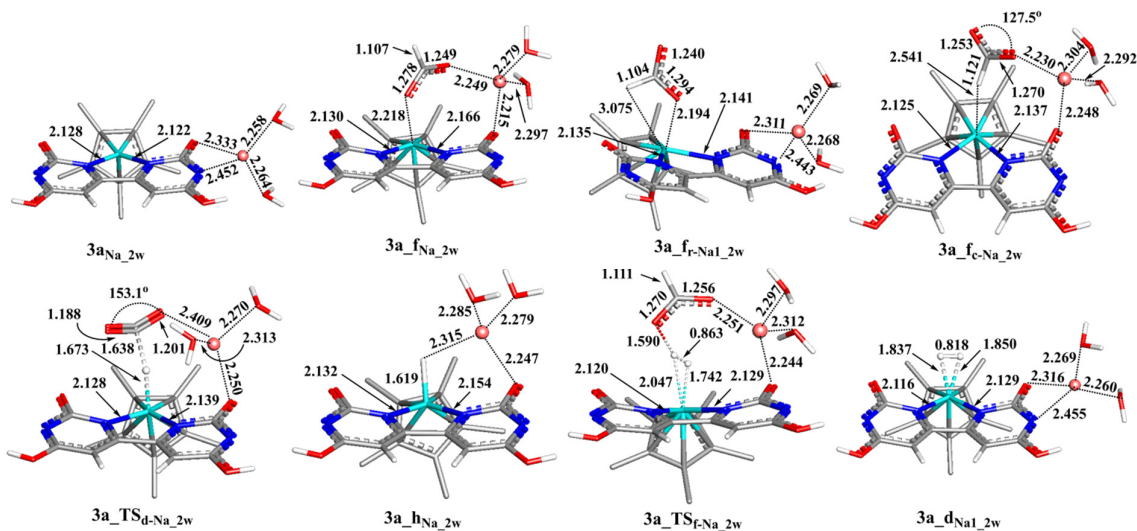

**Fig. S45** Optimized geometries of intermediates and transition states for Na<sup>+</sup> mediated hydride transfer and H<sub>2</sub> formation. Selected geometry parameters are shown in Å and °.

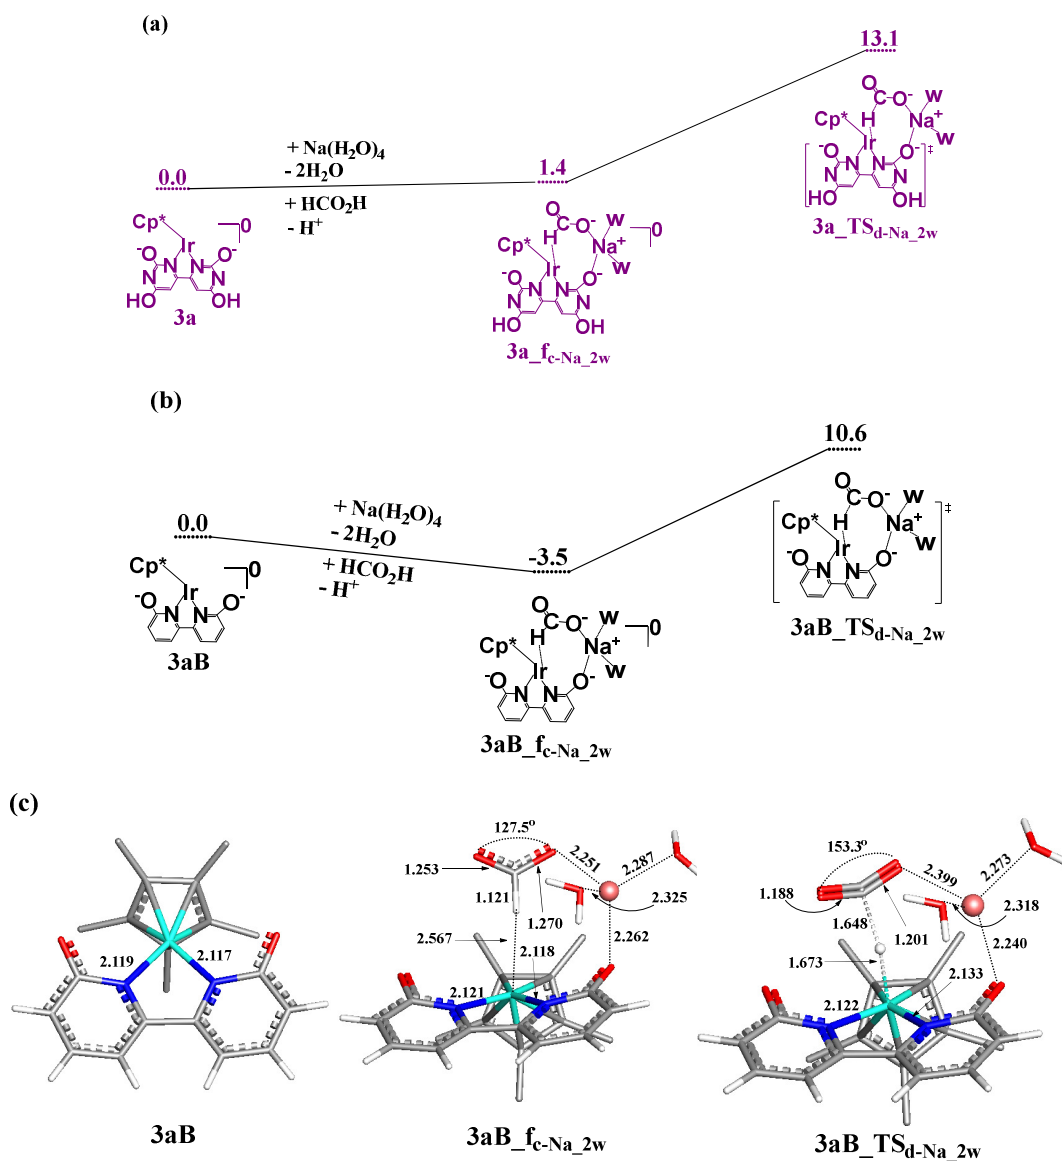

**Fig. S46** (a) Free energy profile (in kcal/mol) at pH 3.5 of Na<sup>+</sup> mediated hydride transfer by complex **C**. (b) Free energy profile (in kcal/mol) at pH 3.5 of Na<sup>+</sup> mediated hydride transfer by complex **B**. A water molecule coordinated to Na<sup>+</sup> is labeled as w for clarity (w = H<sub>2</sub>O). (c) Optimized geometries of **3aB**, **3aB<sub>fc-Na<sub>2</sub>w</sub>**, and **3aB<sub>TSd-Na<sub>2</sub>w</sub>**. Selected optimized geometry parameters are shown in Å.

**Table S2** Relative free energies (in kcal/mol) of  $[\text{IrCp}^*(\text{H}_2\text{O})(\text{bpymO}_4\text{H}_n)]^{n-2}$  ( $n = 0, 1, 2, 3,$  and 4), and starting complexes  $[\text{IrCp}^*(\text{bpymO}_4\text{H}_n)]^{n-2}$  ( $n = 3$  and 4).<sup>a</sup>

| complex                  | substrate                                               | $\Delta G^\circ$<br>1 atm | $\Delta G^*$<br>1 M <sup>b</sup> | $\Delta G^*$<br>1 M<br>pH 3.5 | $\Delta G^*$<br>1 M<br>pH 7.6 <sup>c</sup> | $\Delta G^*$<br>1 M<br>pH 8.3 <sup>c</sup> |
|--------------------------|---------------------------------------------------------|---------------------------|----------------------------------|-------------------------------|--------------------------------------------|--------------------------------------------|
| <b>1-H<sub>2</sub>O</b>  | 2HCO <sub>2</sub> H                                     | 13.4                      | 5.4                              | 14.9                          | 26.1                                       | 24.7                                       |
| <b>2a-H<sub>2</sub>O</b> | H <sup>+</sup> + 2HCO <sub>2</sub> H                    | 12.0                      | 5.8                              | 10.6                          | 16.2                                       | 13.9                                       |
| <b>2b-H<sub>2</sub>O</b> | H <sup>+</sup> + 2HCO <sub>2</sub> H                    | 11.3                      | 5.2                              | 9.9                           | 15.5                                       | 13.2                                       |
| <b>2c-H<sub>2</sub>O</b> | H <sup>+</sup> + 2HCO <sub>2</sub> H                    | 13.9                      | 7.7                              | 12.5                          | 18.1                                       | 15.7                                       |
| <b>2d-H<sub>2</sub>O</b> | H <sup>+</sup> + 2HCO <sub>2</sub> H                    | 13.0                      | 6.8                              | 11.6                          | 17.2                                       | 14.9                                       |
| <b>3a-H<sub>2</sub>O</b> | 2H <sup>+</sup> + 2HCO <sub>2</sub> H                   | 10.1                      | 5.8                              | 5.8                           | 5.8                                        | 2.5                                        |
| <b>3b-H<sub>2</sub>O</b> | 2H <sup>+</sup> + 2HCO <sub>2</sub> H                   | 12.2                      | 8.0                              | 8.0                           | 8.0                                        | 4.7                                        |
| <b>3c-H<sub>2</sub>O</b> | 2H <sup>+</sup> + 2HCO <sub>2</sub> H                   | 19.7                      | 15.4                             | 15.4                          | 15.4                                       | 12.1                                       |
| <b>3d-H<sub>2</sub>O</b> | 2H <sup>+</sup> + 2HCO <sub>2</sub> H                   | 20.3                      | 16.0                             | 16.0                          | 16.0                                       | 12.8                                       |
| <b>3e-H<sub>2</sub>O</b> | 2H <sup>+</sup> + 2HCO <sub>2</sub> H                   | 10.9                      | 6.7                              | 6.7                           | 6.7                                        | 3.4                                        |
| <b>3f-H<sub>2</sub>O</b> | 2H <sup>+</sup> + 2HCO <sub>2</sub> H                   | 12.2                      | 7.9                              | 7.9                           | 7.9                                        | 4.6                                        |
| <b>4a-H<sub>2</sub>O</b> | 3H <sup>+</sup> + 2HCO <sub>2</sub> H                   | 20.9                      | 18.5                             | 13.8                          | 8.2                                        | 4.0                                        |
| <b>4b-H<sub>2</sub>O</b> | 3H <sup>+</sup> + 2HCO <sub>2</sub> H                   | 21.8                      | 19.4                             | 14.6                          | 9.0                                        | 4.8                                        |
| <b>4c-H<sub>2</sub>O</b> | 3H <sup>+</sup> + 2HCO <sub>2</sub> H                   | 19.4                      | 17.0                             | 12.2                          | 6.6                                        | 2.4                                        |
| <b>4d-H<sub>2</sub>O</b> | 3H <sup>+</sup> + 2HCO <sub>2</sub> H                   | 19.8                      | 17.4                             | 12.6                          | 7.0                                        | 2.8                                        |
| <b>5a-H<sub>2</sub>O</b> | 4H <sup>+</sup> + 2HCO <sub>2</sub> H                   | 32.1                      | 31.7                             | 22.1                          | 10.9                                       | 5.8                                        |
| <b>1a</b>                | H <sub>2</sub> O + 2HCO <sub>2</sub> H                  | 5.6                       | 1.8                              | 11.4                          | 22.5                                       | 21.2                                       |
| <b>2a</b>                | H <sup>+</sup> + H <sub>2</sub> O + 2HCO <sub>2</sub> H | 3.4                       | 1.6                              | 6.3                           | 11.9                                       | 9.6                                        |
| <b>2b</b>                | H <sup>+</sup> + H <sub>2</sub> O + 2HCO <sub>2</sub> H | 3.4                       | 1.6                              | 6.3                           | 11.9                                       | 9.6                                        |
| <b>2c</b>                | H <sup>+</sup> + H <sub>2</sub> O + 2HCO <sub>2</sub> H | 5.2                       | 3.4                              | 8.1                           | 13.7                                       | 11.4                                       |
| <b>2d</b>                | H <sup>+</sup> + H <sub>2</sub> O + 2HCO <sub>2</sub> H | 5.2                       | 3.3                              | 8.1                           | 13.6                                       | 11.3                                       |

<sup>a</sup>Free energies are relative to **3a** in Table S3 at 1 atm, 1 M, pH 3.5 and pH 7.6, and relative to **4d** in Table S8 at pH 8.3. <sup>b</sup>For H<sub>2</sub>O, its free energy is at 55.6 M (standard state). <sup>c</sup>At pH 7.6 and 8.3, the substrates HCO<sub>2</sub><sup>-</sup> and H<sup>+</sup> were used for HCO<sub>2</sub>H.

**Table S3** Relative free energies (in kcal/mol) of starting complexes [IrCp\*(bpymO<sub>4</sub>H<sub>n</sub>)]<sup>n-2</sup> (n = 0, 1, and 2), and Ir-OCHO<sup>H</sup> complexes.<sup>a</sup>

| complex                 | substrate                                                | $\Delta G^\circ$<br>1atm | $\Delta G^*$<br>1 M <sup>b</sup> | $\Delta G^*$<br>1 M<br>pH 3.5 | $\Delta G^*$<br>1 M<br>pH 7.6 <sup>c</sup> | $\Delta G^*$<br>1 M<br>pH 8.3 <sup>c</sup> |
|-------------------------|----------------------------------------------------------|--------------------------|----------------------------------|-------------------------------|--------------------------------------------|--------------------------------------------|
| <b>3a</b>               | 2H <sup>+</sup> + H <sub>2</sub> O + 2HCO <sub>2</sub> H | 0.0                      | 0.0                              | 0.0                           | 0.0                                        | -3.3                                       |
| <b>3b</b>               | 2H <sup>+</sup> + H <sub>2</sub> O + 2HCO <sub>2</sub> H | 4.0                      | 4.0                              | 4.0                           | 4.0                                        | 0.8                                        |
| <b>3c</b>               | 2H <sup>+</sup> + H <sub>2</sub> O + 2HCO <sub>2</sub> H | 9.9                      | 9.9                              | 9.9                           | 9.9                                        | 6.7                                        |
| <b>3d</b>               | 2H <sup>+</sup> + H <sub>2</sub> O + 2HCO <sub>2</sub> H | 9.7                      | 9.7                              | 9.7                           | 9.7                                        | 6.5                                        |
| <b>3e</b>               | 2H <sup>+</sup> + H <sub>2</sub> O + 2HCO <sub>2</sub> H | 3.7                      | 3.7                              | 3.7                           | 3.7                                        | 0.4                                        |
| <b>3f</b>               | 2H <sup>+</sup> + H <sub>2</sub> O + 2HCO <sub>2</sub> H | 3.7                      | 3.7                              | 3.7                           | 3.7                                        | 0.4                                        |
| <b>4a</b>               | 3H <sup>+</sup> + H <sub>2</sub> O + 2HCO <sub>2</sub> H | 11.7                     | 13.6                             | 8.8                           | 3.3                                        | -1.0                                       |
| <b>4b</b>               | 3H <sup>+</sup> + H <sub>2</sub> O + 2HCO <sub>2</sub> H | 11.8                     | 13.7                             | 8.9                           | 3.3                                        | -0.9                                       |
| <b>4c</b>               | 3H <sup>+</sup> + H <sub>2</sub> O + 2HCO <sub>2</sub> H | 8.6                      | 10.5                             | 5.7                           | 0.1                                        | -4.1                                       |
| <b>4d</b>               | 3H <sup>+</sup> + H <sub>2</sub> O + 2HCO <sub>2</sub> H | 8.5                      | 10.4                             | 5.6                           | 0.0                                        | -4.2                                       |
| <b>5a</b>               | 4H <sup>+</sup> + H <sub>2</sub> O + 2HCO <sub>2</sub> H | 19.9                     | 23.7                             | 14.2                          | 3.0                                        | -2.2                                       |
| <b>1a_f</b>             | H <sub>2</sub> O + H <sup>+</sup> + HCO <sub>2</sub> H   | 5.4                      | 1.7                              | 6.4                           | 17.1                                       | 15.7                                       |
| <b>2b_f</b>             | 2H <sup>+</sup> + H <sub>2</sub> O + HCO <sub>2</sub> H  | 3.3                      | 1.4                              | 1.4                           | 6.5                                        | 4.2                                        |
| <b>2c_f</b>             | 2H <sup>+</sup> + H <sub>2</sub> O + HCO <sub>2</sub> H  | 5.2                      | 3.3                              | 3.3                           | 8.4                                        | 6.1                                        |
| <b>2d_f</b>             | 2H <sup>+</sup> + H <sub>2</sub> O + HCO <sub>2</sub> H  | 4.3                      | 2.4                              | 2.4                           | 7.5                                        | 5.2                                        |
| <b>3a_f</b>             | 3H <sup>+</sup> + H <sub>2</sub> O + HCO <sub>2</sub> H  | 10.3                     | 10.3                             | 5.5                           | 5.0                                        | 1.8                                        |
| <b>3b_f</b>             | 3H <sup>+</sup> + H <sub>2</sub> O + HCO <sub>2</sub> H  | 7.1                      | 7.1                              | 2.4                           | 1.9                                        | -1.4                                       |
| <b>3d_f</b>             | 3H <sup>+</sup> + H <sub>2</sub> O + HCO <sub>2</sub> H  | 12.7                     | 12.7                             | 7.9                           | 7.4                                        | 4.2                                        |
| <b>3f_f</b>             | 3H <sup>+</sup> + H <sub>2</sub> O + HCO <sub>2</sub> H  | 6.3                      | 6.3                              | 1.5                           | 1.0                                        | -2.2                                       |
| <b>4b_f</b>             | 4H <sup>+</sup> + H <sub>2</sub> O + HCO <sub>2</sub> H  | 17.4                     | 19.3                             | 9.7                           | 3.7                                        | -0.6                                       |
| <b>5a_f</b>             | 5H <sup>+</sup> + H <sub>2</sub> O + HCO <sub>2</sub> H  | 30.4                     | 34.2                             | 19.9                          | 8.2                                        | 3.0                                        |
| <b>3a_f<sub>r</sub></b> | 3H <sup>+</sup> + H <sub>2</sub> O + HCO <sub>2</sub> H  | 10.4                     | 10.4                             | 5.6                           | 5.1                                        | 1.9                                        |
| <b>3f_f<sub>r</sub></b> | 3H <sup>+</sup> + H <sub>2</sub> O + HCO <sub>2</sub> H  | 11.6                     | 11.6                             | 6.8                           | 6.3                                        | 3.1                                        |

<sup>a</sup>Free energies are relative to **3a** at 1 atm, 1 M, pH 3.5 and pH 7.6, and relative to **4d** in Table S8 at pH 8.3. <sup>b</sup>For H<sub>2</sub>O, its free energy is calculated at 55.6 M (standard state). <sup>c</sup>At pH 7.6 and 8.3, the substrates HCO<sub>2</sub><sup>-</sup> and H<sup>+</sup> were used for HCO<sub>2</sub>H.

**Table S4** Relative free energies (in kcal/mol) of Ir-HCO<sub>2</sub><sup>H</sup> complexes, transition states for proton transfer, and Ir-HCO<sub>2</sub>H complexes.<sup>a</sup>

| complex                  | substrate                                               | $\Delta G^\circ$<br>1atm | $\Delta G^*$<br>1 M <sup>b</sup> | $\Delta G^*$<br>1 M<br>pH 3.5 | $\Delta G^*$<br>1 M<br>pH 7.6 <sup>c</sup> | $\Delta G^*$<br>1 M<br>pH 8.3 <sup>c</sup> |
|--------------------------|---------------------------------------------------------|--------------------------|----------------------------------|-------------------------------|--------------------------------------------|--------------------------------------------|
| <b>1a_fa</b>             | H <sub>2</sub> O + H <sup>+</sup> + HCO <sub>2</sub> H  | 16.2                     | 12.4                             | 17.2                          | 27.9                                       | 26.5                                       |
| <b>2b_fa</b>             | 2H <sup>+</sup> + H <sub>2</sub> O + HCO <sub>2</sub> H | 12.7                     | 10.8                             | 10.8                          | 15.9                                       | 13.6                                       |
| <b>2c_fa</b>             | 2H <sup>+</sup> + H <sub>2</sub> O + HCO <sub>2</sub> H | 15.5                     | 13.6                             | 13.6                          | 18.7                                       | 16.4                                       |
| <b>2d_fa</b>             | 2H <sup>+</sup> + H <sub>2</sub> O + HCO <sub>2</sub> H | 13.7                     | 11.8                             | 11.8                          | 16.9                                       | 14.6                                       |
| <b>3b_fa</b>             | 3H <sup>+</sup> + H <sub>2</sub> O + HCO <sub>2</sub> H | 12.6                     | 12.6                             | 7.8                           | 7.3                                        | 4.1                                        |
| <b>3f_fa</b>             | 3H <sup>+</sup> + H <sub>2</sub> O + HCO <sub>2</sub> H | 10.5                     | 10.5                             | 5.7                           | 5.2                                        | 2.0                                        |
| <b>4b_fa</b>             | 4H <sup>+</sup> + H <sub>2</sub> O + HCO <sub>2</sub> H | 20.5                     | 22.4                             | 12.8                          | 6.7                                        | 2.5                                        |
| <b>2a_TS<sub>p</sub></b> | H <sub>2</sub> O + H <sup>+</sup> + HCO <sub>2</sub> H  | 22.0                     | 18.2                             | 23.0                          | 33.7                                       | 32.3                                       |
| <b>3a_TS<sub>p</sub></b> | 2H <sup>+</sup> + H <sub>2</sub> O + HCO <sub>2</sub> H | 18.7                     | 16.8                             | 16.8                          | 21.9                                       | 19.6                                       |
| <b>3c_TS<sub>p</sub></b> | 2H <sup>+</sup> + H <sub>2</sub> O + HCO <sub>2</sub> H | 19.8                     | 18.0                             | 18.0                          | 23.0                                       | 20.7                                       |
| <b>3e_TS<sub>p</sub></b> | 2H <sup>+</sup> + H <sub>2</sub> O + HCO <sub>2</sub> H | 19.5                     | 17.6                             | 17.6                          | 22.7                                       | 20.4                                       |
| <b>2a_fb</b>             | H <sub>2</sub> O + H <sup>+</sup> + HCO <sub>2</sub> H  | 6.4                      | 2.6                              | 7.4                           | 18.0                                       | 16.7                                       |
| <b>3a_fb</b>             | 2H <sup>+</sup> + H <sub>2</sub> O + HCO <sub>2</sub> H | 4.5                      | 2.6                              | 2.6                           | 7.7                                        | 5.4                                        |
| <b>3c_fb</b>             | 2H <sup>+</sup> + H <sub>2</sub> O + HCO <sub>2</sub> H | 13.1                     | 11.2                             | 11.2                          | 16.3                                       | 13.9                                       |
| <b>3e_fb</b>             | 2H <sup>+</sup> + H <sub>2</sub> O + HCO <sub>2</sub> H | 6.2                      | 4.3                              | 4.3                           | 9.4                                        | 7.1                                        |
| <b>4a_fb</b>             | 3H <sup>+</sup> + H <sub>2</sub> O + HCO <sub>2</sub> H | 14.0                     | 14.0                             | 9.2                           | 8.8                                        | 5.5                                        |
| <b>4d_fb</b>             | 3H <sup>+</sup> + H <sub>2</sub> O + HCO <sub>2</sub> H | 12.3                     | 12.3                             | 7.5                           | 7.0                                        | 3.8                                        |
| <b>4c_fb</b>             | 3H <sup>+</sup> + H <sub>2</sub> O + HCO <sub>2</sub> H | 12.4                     | 12.4                             | 7.7                           | 7.2                                        | 3.9                                        |
| <b>5a_fb</b>             | 4H <sup>+</sup> + H <sub>2</sub> O + HCO <sub>2</sub> H | 20.9                     | 22.8                             | 13.2                          | 7.1                                        | 2.9                                        |

<sup>a</sup>Free energies are relative to **3a** in Table S3 at 1 atm, 1 M, pH 3.5 and pH 7.6, and relative to **4d** in Table S8 at pH 8.3. <sup>b</sup>For H<sub>2</sub>O, its free energy is calculated at 55.6 M (standard state). <sup>c</sup>At pH 7.6 and 8.3, the substrates HCO<sub>2</sub><sup>-</sup> and H<sup>+</sup> were used for HCO<sub>2</sub>H.

**Table S5** Relative free energies (in kcal/mol) of Ir-HCO<sub>2</sub> complexes and transition states for direct hydride transfer.<sup>a</sup>

| complex       | substrate                                               | $\Delta G^\circ$<br>1atm | $\Delta G^*$<br>1 M <sup>b</sup> | $\Delta G^*$<br>1 M<br>pH 3.5 | $\Delta G^*$<br>1 M<br>pH 7.6 <sup>c</sup> | $\Delta G^*$<br>1 M<br>pH 8.3 <sup>c</sup> |
|---------------|---------------------------------------------------------|--------------------------|----------------------------------|-------------------------------|--------------------------------------------|--------------------------------------------|
| <b>1a_fc</b>  | H <sub>2</sub> O + H <sup>+</sup> + HCO <sub>2</sub> H  | 18.4                     | 14.6                             | 19.4                          | 30.1                                       | 28.7                                       |
| <b>2b_fc</b>  | 2H <sup>+</sup> + H <sub>2</sub> O + HCO <sub>2</sub> H | 16.7                     | 14.8                             | 14.8                          | 19.9                                       | 17.6                                       |
| <b>2c_fc</b>  | 2H <sup>+</sup> + H <sub>2</sub> O + HCO <sub>2</sub> H | 17.1                     | 15.2                             | 15.2                          | 20.3                                       | 18.0                                       |
| <b>2d_fc</b>  | 2H <sup>+</sup> + H <sub>2</sub> O + HCO <sub>2</sub> H | 17.9                     | 16.0                             | 16.0                          | 21.1                                       | 18.8                                       |
| <b>3a_fc</b>  | 3H <sup>+</sup> + H <sub>2</sub> O + HCO <sub>2</sub> H | 11.4                     | 11.4                             | 6.6                           | 6.1                                        | 2.9                                        |
| <b>3b_fc</b>  | 3H <sup>+</sup> + H <sub>2</sub> O + HCO <sub>2</sub> H | 14.6                     | 14.6                             | 9.8                           | 9.3                                        | 6.1                                        |
| <b>3d_fc</b>  | 3H <sup>+</sup> + H <sub>2</sub> O + HCO <sub>2</sub> H | 19.6                     | 19.6                             | 14.8                          | 14.3                                       | 11.0                                       |
| <b>3f_fc</b>  | 3H <sup>+</sup> + H <sub>2</sub> O + HCO <sub>2</sub> H | 13.0                     | 13.0                             | 8.2                           | 7.7                                        | 4.5                                        |
| <b>4b_fc</b>  | 4H <sup>+</sup> + H <sub>2</sub> O + HCO <sub>2</sub> H | 23.0                     | 24.9                             | 15.4                          | 9.3                                        | 5.1                                        |
| <b>1a_TSa</b> | H <sub>2</sub> O + H <sup>+</sup> + HCO <sub>2</sub> H  | 22.3                     | 18.6                             | 23.3                          | 34.0                                       | 32.6                                       |
| <b>2b_TSa</b> | 2H <sup>+</sup> + H <sub>2</sub> O + HCO <sub>2</sub> H | 20.9                     | 19.0                             | 19.0                          | 24.1                                       | 21.8                                       |
| <b>2c_TSa</b> | 2H <sup>+</sup> + H <sub>2</sub> O + HCO <sub>2</sub> H | 23.9                     | 22.0                             | 22.0                          | 27.1                                       | 24.8                                       |
| <b>2d_TSa</b> | 2H <sup>+</sup> + H <sub>2</sub> O + HCO <sub>2</sub> H | 24.0                     | 22.2                             | 22.2                          | 27.2                                       | 24.9                                       |

<sup>a</sup>Free energies are relative to **3a** in Table S3 at 1 atm, 1 M, pH 3.5 and pH 7.6, and relative to **4d** in Table S8 at pH 8.3. <sup>b</sup>For H<sub>2</sub>O, its free energy is calculated at 55.6 M (standard state). <sup>c</sup>At pH 7.6 and 8.3, the substrates HCO<sub>2</sub><sup>-</sup> and H<sup>+</sup> were used for HCO<sub>2</sub>H.



**Table S6** Relative free energies (in kcal/mol) of transition states for direct hydride transfer (cont.), associative transition state, and Ir-H complexes.<sup>a</sup>

| complex                     | substrate                                                                 | $\Delta G^\circ$<br>1 atm | $\Delta G^*$<br>1 M <sup>b</sup> | $\Delta G^*$<br>1 M<br>pH 3.5 | $\Delta G^*$<br>1 M<br>pH 7.6 <sup>c</sup> | $\Delta G^*$<br>1 M<br>pH 8.3 <sup>c</sup> |
|-----------------------------|---------------------------------------------------------------------------|---------------------------|----------------------------------|-------------------------------|--------------------------------------------|--------------------------------------------|
| <b>3a_TS<sub>d</sub></b>    | 3H <sup>+</sup> + H <sub>2</sub> O + HCO <sub>2</sub> H                   | 23.0                      | 23.0                             | 18.2                          | 17.7                                       | 14.5                                       |
| <b>3b_TS<sub>d</sub></b>    | 3H <sup>+</sup> + H <sub>2</sub> O + HCO <sub>2</sub> H                   | 26.1                      | 26.1                             | 21.4                          | 20.9                                       | 17.6                                       |
| <b>3d_TS<sub>d</sub></b>    | 3H <sup>+</sup> + H <sub>2</sub> O + HCO <sub>2</sub> H                   | 31.3                      | 31.3                             | 26.5                          | 26.0                                       | 22.8                                       |
| <b>3f_TS<sub>d</sub></b>    | 3H <sup>+</sup> + H <sub>2</sub> O + HCO <sub>2</sub> H                   | 24.5                      | 24.5                             | 19.7                          | 19.2                                       | 16.0                                       |
| <b>4b_TS<sub>d</sub></b>    | 4H <sup>+</sup> + H <sub>2</sub> O + HCO <sub>2</sub> H                   | 35.5                      | 37.4                             | 27.8                          | 21.8                                       | 17.5                                       |
| <b>4d_TS<sub>d</sub></b>    | 4H <sup>+</sup> + H <sub>2</sub> O + HCO <sub>2</sub> H                   | 34.6                      | 36.5                             | 27.0                          | 20.9                                       | 16.7                                       |
| <b>5a_TS<sub>d</sub></b>    | 5H <sup>+</sup> + H <sub>2</sub> O + HCO <sub>2</sub> H                   | 47.2                      | 51.0                             | 36.7                          | 25.0                                       | 19.8                                       |
| <b>3a_TS<sub>asso</sub></b> | 3H <sup>+</sup> + H <sub>2</sub> O + HCO <sub>2</sub> H                   | 32.4                      | 32.4                             | 27.6                          | 27.1                                       | 22.9                                       |
| <b>1a_h</b>                 | H <sub>2</sub> O + H <sup>+</sup> + HCO <sub>2</sub> H + CO <sub>2</sub>  | 9.1                       | 7.2                              | 12.0                          | 22.7                                       | 21.3                                       |
| <b>2b_h</b>                 | 2H <sup>+</sup> + H <sub>2</sub> O + HCO <sub>2</sub> H + CO <sub>2</sub> | 9.2                       | 9.2                              | 9.2                           | 14.3                                       | 12.0                                       |
| <b>2c_h</b>                 | 2H <sup>+</sup> + H <sub>2</sub> O + HCO <sub>2</sub> H + CO <sub>2</sub> | 9.5                       | 9.5                              | 9.5                           | 14.6                                       | 12.3                                       |
| <b>2d_h</b>                 | 2H <sup>+</sup> + H <sub>2</sub> O + HCO <sub>2</sub> H + CO <sub>2</sub> | 10.9                      | 10.9                             | 10.9                          | 16.0                                       | 13.7                                       |
| <b>3a_h</b>                 | 3H <sup>+</sup> + H <sub>2</sub> O + HCO <sub>2</sub> H + CO <sub>2</sub> | 9.6                       | 11.5                             | 6.7                           | 6.2                                        | 3.0                                        |
| <b>3b_h</b>                 | 3H <sup>+</sup> + H <sub>2</sub> O + HCO <sub>2</sub> H + CO <sub>2</sub> | 13.0                      | 14.8                             | 10.1                          | 9.6                                        | 6.3                                        |
| <b>3d_h</b>                 | 3H <sup>+</sup> + H <sub>2</sub> O + HCO <sub>2</sub> H + CO <sub>2</sub> | 19.9                      | 21.8                             | 17.1                          | 16.6                                       | 13.3                                       |
| <b>3f_h</b>                 | 3H <sup>+</sup> + H <sub>2</sub> O + HCO <sub>2</sub> H + CO <sub>2</sub> | 11.7                      | 13.6                             | 8.8                           | 8.3                                        | 5.1                                        |
| <b>4b_h</b>                 | 4H <sup>+</sup> + H <sub>2</sub> O + HCO <sub>2</sub> H + CO <sub>2</sub> | 23.7                      | 27.5                             | 18.0                          | 11.9                                       | 7.7                                        |
| <b>4d_h</b>                 | 4H <sup>+</sup> + H <sub>2</sub> O + HCO <sub>2</sub> H + CO <sub>2</sub> | 21.9                      | 25.7                             | 16.1                          | 10.0                                       | 5.8                                        |
| <b>5a_h</b>                 | 5H <sup>+</sup> + H <sub>2</sub> O + HCO <sub>2</sub> H + CO <sub>2</sub> | 35.3                      | 41.0                             | 26.7                          | 15.0                                       | 9.9                                        |

<sup>a</sup>Free energies are relative to **3a** in Table S3 at 1 atm, 1 M, pH 3.5 and pH 7.6, and relative to **4d** in Table S8 at pH 8.3. <sup>b</sup>For H<sub>2</sub>O, its free energy is calculated at 55.6 M (standard state). <sup>c</sup>At pH 7.6 and 8.3, the substrates HCO<sub>2</sub><sup>-</sup> and H<sup>+</sup> were used for HCO<sub>2</sub>H.

**Table S7** Relative free energies (in kcal/mol) of transition states for H<sub>2</sub> formation with HCO<sub>2</sub>H or H<sub>2</sub>O as a proton shuttle, and Ir-H<sub>2</sub> complexes.<sup>a</sup>

| complex            | substrate                                                                 | $\Delta G^\circ$<br>1 atm | $\Delta G^*$<br>1 M <sup>b</sup> | $\Delta G^*$<br>1 M<br>pH 3.5 | $\Delta G^*$<br>1 M<br>pH 7.6 <sup>c</sup> | $\Delta G^*$<br>1 M<br>pH 8.3 <sup>c</sup> |
|--------------------|---------------------------------------------------------------------------|---------------------------|----------------------------------|-------------------------------|--------------------------------------------|--------------------------------------------|
| 1a_TS <sub>f</sub> | H <sub>2</sub> O + H <sup>+</sup> + CO <sub>2</sub>                       | 21.0                      | 17.3                             | 22.0                          | 37.8                                       | 37.4                                       |
| 2b_TS <sub>f</sub> | 2H <sup>+</sup> + H <sub>2</sub> O + CO <sub>2</sub>                      | 18.8                      | 16.9                             | 16.9                          | 27.0                                       | 25.7                                       |
| 2c_TS <sub>f</sub> | 2H <sup>+</sup> + H <sub>2</sub> O + CO <sub>2</sub>                      | 21.8                      | 20.0                             | 20.0                          | 30.1                                       | 28.8                                       |
| 2d_TS <sub>f</sub> | 2H <sup>+</sup> + H <sub>2</sub> O + CO <sub>2</sub>                      | 20.8                      | 18.9                             | 18.9                          | 29.0                                       | 27.7                                       |
| 3b_TS <sub>f</sub> | 3H <sup>+</sup> + H <sub>2</sub> O + CO <sub>2</sub>                      | 24.2                      | 24.2                             | 19.5                          | 24.0                                       | 21.7                                       |
| 3d_TS <sub>f</sub> | 3H <sup>+</sup> + H <sub>2</sub> O + CO <sub>2</sub>                      | 28.8                      | 28.8                             | 24.0                          | 28.6                                       | 26.3                                       |
| 3f_TS <sub>f</sub> | 3H <sup>+</sup> + H <sub>2</sub> O + CO <sub>2</sub>                      | 23.3                      | 23.3                             | 18.6                          | 23.2                                       | 20.8                                       |
| 4b_TS <sub>f</sub> | 4H <sup>+</sup> + H <sub>2</sub> O + CO <sub>2</sub>                      | 33.1                      | 34.9                             | 25.4                          | 24.4                                       | 21.2                                       |
| 1a_TS <sub>w</sub> | H <sup>+</sup> + HCO <sub>2</sub> H + CO <sub>2</sub>                     | 24.5                      | 18.3                             | 23.1                          | 33.8                                       | 32.4                                       |
| 2b_TS <sub>w</sub> | 2H <sup>+</sup> + HCO <sub>2</sub> H + CO <sub>2</sub>                    | 24.0                      | 19.8                             | 19.8                          | 24.9                                       | 22.6                                       |
| 2c_TS <sub>w</sub> | 2H <sup>+</sup> + HCO <sub>2</sub> H + CO <sub>2</sub>                    | 30.5                      | 26.2                             | 26.2                          | 31.3                                       | 29.0                                       |
| 2d_TS <sub>w</sub> | 2H <sup>+</sup> + HCO <sub>2</sub> H + CO <sub>2</sub>                    | 25.2                      | 20.9                             | 20.9                          | 26.0                                       | 23.7                                       |
| 3b_TS <sub>w</sub> | 3H <sup>+</sup> + HCO <sub>2</sub> H + CO <sub>2</sub>                    | 32.3                      | 29.9                             | 25.1                          | 24.6                                       | 21.4                                       |
| 3d_TS <sub>w</sub> | 3H <sup>+</sup> + HCO <sub>2</sub> H + CO <sub>2</sub>                    | 33.9                      | 31.5                             | 26.7                          | 26.2                                       | 23.0                                       |
| 3f_TS <sub>w</sub> | 3H <sup>+</sup> + HCO <sub>2</sub> H + CO <sub>2</sub>                    | 31.5                      | 29.1                             | 24.3                          | 23.8                                       | 20.6                                       |
| 4b_TS <sub>w</sub> | 4H <sup>+</sup> + HCO <sub>2</sub> H + CO <sub>2</sub>                    | 42.5                      | 42.0                             | 32.5                          | 26.4                                       | 22.2                                       |
| 1a_d               | H <sub>2</sub> O + HCO <sub>2</sub> H + CO <sub>2</sub>                   | 15.1                      | 11.3                             | 20.9                          | 37.1                                       | 36.7                                       |
| 2b_d               | H <sub>2</sub> O + H <sup>+</sup> + HCO <sub>2</sub> H + CO <sub>2</sub>  | 12.0                      | 10.1                             | 14.9                          | 25.6                                       | 24.2                                       |
| 2c_d               | H <sub>2</sub> O + H <sup>+</sup> + HCO <sub>2</sub> H + CO <sub>2</sub>  | 12.6                      | 10.7                             | 15.5                          | 26.1                                       | 24.8                                       |
| 2d_d               | H <sub>2</sub> O + H <sup>+</sup> + HCO <sub>2</sub> H + CO <sub>2</sub>  | 14.0                      | 12.1                             | 16.9                          | 27.6                                       | 26.2                                       |
| 3a_d               | 2H <sup>+</sup> + H <sub>2</sub> O + HCO <sub>2</sub> H + CO <sub>2</sub> | 8.6                       | 8.6                              | 8.6                           | 13.7                                       | 11.4                                       |
| 3b_d               | 2H <sup>+</sup> + H <sub>2</sub> O + HCO <sub>2</sub> H + CO <sub>2</sub> | 13.4                      | 13.4                             | 13.4                          | 18.5                                       | 16.2                                       |
| 3d_d               | 2H <sup>+</sup> + H <sub>2</sub> O + HCO <sub>2</sub> H + CO <sub>2</sub> | 19.0                      | 19.0                             | 19.0                          | 24.1                                       | 21.8                                       |
| 3f_d               | 2H <sup>+</sup> + H <sub>2</sub> O + HCO <sub>2</sub> H + CO <sub>2</sub> | 11.1                      | 11.1                             | 11.1                          | 16.2                                       | 13.9                                       |
| 4b_d               | 3H <sup>+</sup> + H <sub>2</sub> O + HCO <sub>2</sub> H + CO <sub>2</sub> | 19.7                      | 21.6                             | 16.9                          | 16.4                                       | 13.1                                       |
| 4d_d               | 3H <sup>+</sup> + H <sub>2</sub> O + HCO <sub>2</sub> H + CO <sub>2</sub> | 16.9                      | 18.8                             | 14.0                          | 13.5                                       | 10.3                                       |
| 5a_d               | 4H <sup>+</sup> + H <sub>2</sub> O + HCO <sub>2</sub> H + CO <sub>2</sub> | 27.7                      | 31.4                             | 21.9                          | 15.8                                       | 11.6                                       |

<sup>a</sup>Free energies are relative to **3a** in Table S3 at 1 atm, 1 M, pH 3.5 and pH 7.6, and relative to **4d** in Table S8 at pH 8.3. <sup>b</sup>For H<sub>2</sub>O, its free energy is calculated at 55.6 M (standard state). <sup>c</sup>At pH 7.6 and 8.3, the substrates HCO<sub>2</sub><sup>-</sup> and H<sup>+</sup> were used for HCO<sub>2</sub>H.

**Table S8** Relative free energies (in kcal/mol) of regeneration of complexes [IrCp\*(bpymO<sub>4</sub>H<sub>n</sub>)]<sup>n-2</sup> (n = 0, 1, 2, 3 and 4) in HCO<sub>2</sub>H dehydrogenation to produce CO<sub>2</sub> and H<sub>2</sub>.<sup>a</sup>

| complex   | substrate                                                                                  | $\Delta G^\circ$<br>1 atm | $\Delta G^*$<br>1 M <sup>b</sup> | $\Delta G^*$<br>1 M<br>pH 3.5 | $\Delta G^*$<br>1 M<br>pH 7.6 <sup>c</sup> | $\Delta G^*$<br>1 M<br>pH 8.3 <sup>c</sup> |
|-----------|--------------------------------------------------------------------------------------------|---------------------------|----------------------------------|-------------------------------|--------------------------------------------|--------------------------------------------|
| <b>1a</b> | H <sub>2</sub> O + HCO <sub>2</sub> H + CO <sub>2</sub> + H <sub>2</sub>                   | 1.9                       | 0.0                              | 9.5                           | 25.8                                       | 25.4                                       |
| <b>2a</b> | H <sub>2</sub> O + H <sup>+</sup> + HCO <sub>2</sub> H + CO <sub>2</sub> + H <sub>2</sub>  | -0.3                      | -0.3                             | 4.5                           | 15.2                                       | 13.8                                       |
| <b>2b</b> | H <sub>2</sub> O + H <sup>+</sup> + HCO <sub>2</sub> H + CO <sub>2</sub> + H <sub>2</sub>  | -0.3                      | -0.3                             | 4.5                           | 15.1                                       | 13.8                                       |
| <b>2c</b> | H <sub>2</sub> O + H <sup>+</sup> + HCO <sub>2</sub> H + CO <sub>2</sub> + H <sub>2</sub>  | 1.5                       | 1.5                              | 6.3                           | 17.0                                       | 15.6                                       |
| <b>2d</b> | H <sub>2</sub> O + H <sup>+</sup> + HCO <sub>2</sub> H + CO <sub>2</sub> + H <sub>2</sub>  | 1.4                       | 1.4                              | 6.2                           | 16.9                                       | 15.5                                       |
| <b>3a</b> | 2H <sup>+</sup> + H <sub>2</sub> O + HCO <sub>2</sub> H + CO <sub>2</sub> + H <sub>2</sub> | -3.7                      | -1.8                             | -1.8                          | 3.2                                        | 0.9                                        |
| <b>3b</b> | 2H <sup>+</sup> + H <sub>2</sub> O + HCO <sub>2</sub> H + CO <sub>2</sub> + H <sub>2</sub> | 0.3                       | 2.2                              | 2.2                           | 7.3                                        | 5.0                                        |
| <b>3c</b> | 2H <sup>+</sup> + H <sub>2</sub> O + HCO <sub>2</sub> H + CO <sub>2</sub> + H <sub>2</sub> | 6.2                       | 8.1                              | 8.1                           | 13.2                                       | 10.9                                       |
| <b>3d</b> | 2H <sup>+</sup> + H <sub>2</sub> O + HCO <sub>2</sub> H + CO <sub>2</sub> + H <sub>2</sub> | 6.0                       | 7.9                              | 7.9                           | 13.0                                       | 10.6                                       |
| <b>3e</b> | 2H <sup>+</sup> + H <sub>2</sub> O + HCO <sub>2</sub> H + CO <sub>2</sub> + H <sub>2</sub> | 0.0                       | 1.9                              | 1.9                           | 6.9                                        | 4.6                                        |
| <b>3f</b> | 2H <sup>+</sup> + H <sub>2</sub> O + HCO <sub>2</sub> H + CO <sub>2</sub> + H <sub>2</sub> | 0.0                       | 1.9                              | 1.9                           | 6.9                                        | 4.6                                        |
| <b>4a</b> | 3H <sup>+</sup> + H <sub>2</sub> O + HCO <sub>2</sub> H + CO <sub>2</sub> + H <sub>2</sub> | 8.0                       | 11.8                             | 7.0                           | 6.5                                        | 3.2                                        |
| <b>4b</b> | 3H <sup>+</sup> + H <sub>2</sub> O + HCO <sub>2</sub> H + CO <sub>2</sub> + H <sub>2</sub> | 8.0                       | 11.8                             | 7.0                           | 6.6                                        | 3.3                                        |
| <b>4c</b> | 3H <sup>+</sup> + H <sub>2</sub> O + HCO <sub>2</sub> H + CO <sub>2</sub> + H <sub>2</sub> | 4.8                       | 8.6                              | 3.8                           | 3.3                                        | 0.1                                        |
| <b>4d</b> | 3H <sup>+</sup> + H <sub>2</sub> O + HCO <sub>2</sub> H + CO <sub>2</sub> + H <sub>2</sub> | 4.7                       | 8.5                              | 3.8                           | 3.3                                        | 0.0                                        |
| <b>5a</b> | 4H <sup>+</sup> + H <sub>2</sub> O + HCO <sub>2</sub> H + CO <sub>2</sub> + H <sub>2</sub> | 16.2                      | 21.9                             | 12.3                          | 6.2                                        | 2.0                                        |

<sup>a</sup>Free energies are relative to **3a** in Table S3 at 1 atm, 1 M, pH 3.5 and pH 7.6, and relative to **4d** at pH 8.3. <sup>b</sup>For H<sub>2</sub>O, its free energy is calculated at 55.6 M (standard state). <sup>c</sup>At pH 7.6 and 8.3, the substrates HCO<sub>2</sub><sup>-</sup> and H<sup>+</sup> were used for HCO<sub>2</sub>H.

**Table S9** Relative free energies (in kcal/mol) of intermediates and transition states with starting  $\text{Na}^+(\text{H}_2\text{O})_4$  substrate in the formate rotation and hydride transfer pathways.<sup>a</sup>

| complex                      | substrate                                                                                 | $\Delta G^\circ$<br>1 atm | $\Delta G^*$<br>1 M <sup>b</sup> | $\Delta G^*$<br>1 M<br>pH<br>3.5 | $\Delta G^*$<br>1 M<br>pH 7.6 <sup>c</sup> | $\Delta G^*$<br>1 M<br>pH 8.3 <sup>c</sup> |
|------------------------------|-------------------------------------------------------------------------------------------|---------------------------|----------------------------------|----------------------------------|--------------------------------------------|--------------------------------------------|
| <b>3a</b>                    | $2\text{HCO}_2\text{H} + \text{Na}(\text{H}_2\text{O})_4 + \text{HCO}_3^-$                | 0.0                       | 0.0                              | 0.0                              | 0.0                                        | -3.3                                       |
| <b>4c</b>                    | $2\text{HCO}_2\text{H} + \text{Na}(\text{H}_2\text{O})_4 + \text{HCO}_3^- + \text{H}^+$   | 8.6                       | 10.5                             | 5.7                              | 0.1                                        | -4.1                                       |
| <b>4d</b>                    | $2\text{HCO}_2\text{H} + \text{Na}(\text{H}_2\text{O})_4 + \text{HCO}_3^- + \text{H}^+$   | 8.5                       | 10.4                             | 5.6                              | 0.0                                        | -4.2                                       |
| <b>3a<sub>Na_2w</sub></b>    | $2\text{HCO}_2\text{H} + 2\text{H}_2\text{O} + \text{HCO}_3^-$                            | -4.6                      | 2.1                              | 2.1                              | 2.1                                        | -1.2                                       |
| <b>4c<sub>Na_2w</sub></b>    | $2\text{HCO}_2\text{H} + \text{H}^+ + 2\text{H}_2\text{O} + \text{HCO}_3^-$               | 1.0                       | 9.5                              | 4.7                              | -0.9                                       | -5.1                                       |
| <b>3a<sub>fNa_2w</sub></b>   | $\text{HCO}_2\text{H} + \text{H}^+ + 2\text{H}_2\text{O} + \text{HCO}_3^-$                | -1.6                      | 5.1                              | 0.3                              | -0.2                                       | -3.5                                       |
| <b>4c<sub>fNa_2w</sub></b>   | $\text{HCO}_2\text{H} + 2\text{H}^+ + 2\text{H}_2\text{O} + \text{HCO}_3^-$               | 8.1                       | 16.7                             | 7.1                              | 1.0                                        | -3.2                                       |
| <b>3a<sub>fNa1_2w</sub></b>  | $\text{HCO}_2\text{H} + \text{H}^+ + 2\text{H}_2\text{O} + \text{HCO}_3^-$                | 0.1                       | 6.7                              | 2.0                              | 1.3                                        | -1.8                                       |
| <b>4c<sub>fNa1_2w</sub></b>  | $\text{HCO}_2\text{H} + 2\text{H}^+ + 2\text{H}_2\text{O} + \text{HCO}_3^-$               | 8.4                       | 16.9                             | 7.4                              | 1.5                                        | -2.9                                       |
| <b>3a<sub>fcNa_2w</sub></b>  | $\text{HCO}_2\text{H} + \text{H}^+ + 2\text{H}_2\text{O} + \text{HCO}_3^-$                | -0.4                      | 6.2                              | 1.4                              | 1.0                                        | -2.4                                       |
| <b>4c<sub>fcNa_2w</sub></b>  | $\text{HCO}_2\text{H} + 2\text{H}^+ + 2\text{H}_2\text{O} + \text{HCO}_3^-$               | 4.3                       | 12.8                             | 3.3                              | -2.8                                       | -7.0                                       |
| <b>3a<sub>TSdNa_2w</sub></b> | $\text{HCO}_2\text{H} + \text{H}^+ + 2\text{H}_2\text{O} + \text{HCO}_3^-$                | 11.2                      | 17.9                             | 13.1                             | 15.1                                       | 9.3                                        |
| <b>4c<sub>TSdNa_2w</sub></b> | $\text{HCO}_2\text{H} + 2\text{H}^+ + 2\text{H}_2\text{O} + \text{HCO}_3^-$               | 22.2                      | 30.7                             | 21.2                             | 12.6                                       | 10.8                                       |
| <b>3a<sub>hNa_2w</sub></b>   | $\text{HCO}_2\text{H} + \text{H}^+ + \text{CO}_2 + 2\text{H}_2\text{O} + \text{HCO}_3^-$  | -1.0                      | 7.6                              | 2.8                              | 2.3                                        | -1.0                                       |
| <b>3a<sub>hNa1_2w</sub></b>  | $\text{HCO}_2\text{H} + \text{H}^+ + \text{CO}_2 + 2\text{H}_2\text{O} + \text{HCO}_3^-$  | 2.3                       | 10.9                             | 6.1                              | 5.6                                        | 7.4                                        |
| <b>4c<sub>hNa_2w</sub></b>   | $\text{HCO}_2\text{H} + 2\text{H}^+ + \text{CO}_2 + 2\text{H}_2\text{O} + \text{HCO}_3^-$ | 10.0                      | 20.5                             | 10.9                             | 4.9                                        | 0.6                                        |
| <b>4c<sub>hNa1_2w</sub></b>  | $\text{HCO}_2\text{H} + 2\text{H}^+ + \text{CO}_2 + 2\text{H}_2\text{O} + \text{HCO}_3^-$ | 10.2                      | 20.6                             | 11.1                             | 5.0                                        | 0.7                                        |

<sup>a</sup>Free energies are relative to **3a** at 1 atm, 1 M, pH 3.5 and pH 7.6, and relative to **4d** in Table S10 at pH 8.3. <sup>b</sup>For  $\text{H}_2\text{O}$ , its free energy is calculated at 55.6 M (standard state). <sup>c</sup>At pH 7.6 and 8.3, the substrates  $\text{HCO}_2^-$  and  $\text{H}^+$  were used for  $\text{HCO}_2\text{H}$ .

**Table S10** Relative free energies (in kcal/mol) of intermediates and transition states with starting  $\text{Na}^+(\text{H}_2\text{O})_4$  substrate in the  $\text{H}_2$  formation pathway for pH 3.5 and pH 7.6 and heterolytic cleavage of  $\text{H}_2$  for pH 8.3.<sup>a</sup>

| complex                           | Substrate                                                                                                         | $\Delta G^\circ$<br>1 atm | $\Delta G^*$<br>1 M <sup>b</sup> | $\Delta G^*$<br>1 M<br>pH<br>3.5 | $\Delta G^*$<br>1 M<br>pH<br>7.6 <sup>c</sup> | $\Delta G^*$<br>1 M<br>pH<br>8.3 <sup>c</sup> |
|-----------------------------------|-------------------------------------------------------------------------------------------------------------------|---------------------------|----------------------------------|----------------------------------|-----------------------------------------------|-----------------------------------------------|
| <b>2b</b> _TS <sub>w_Na1_2w</sub> | $\text{HCO}_2\text{H} + \text{CO}_2 + \text{H}_2\text{O} + \text{HCO}_3^-$                                        | 17.6                      | 20.0                             | 20.0                             | 25.0                                          | 22.7                                          |
| <b>3f</b> _TS <sub>w_Na1_2w</sub> | $\text{HCO}_2\text{H} + \text{H}^+ + \text{CO}_2 + \text{H}_2\text{O} + \text{HCO}_3^-$                           | 24.0                      | 28.3                             | 23.5                             | 23.0                                          | 19.7                                          |
| <b>3a</b> _TS <sub>f_Na_2w</sub>  | $\text{H}^+ + \text{CO}_2 + 2\text{H}_2\text{O} + \text{HCO}_3^-$                                                 | 8.8                       | 15.5                             | 10.7                             | 15.3                                          | 17.1                                          |
| <b>4c</b> _TS <sub>f_Na_2w</sub>  | $2\text{H}^+ + \text{CO}_2 + 2\text{H}_2\text{O} + \text{HCO}_3^-$                                                | 17.9                      | 26.4                             | 16.9                             | 15.9                                          | 16.8                                          |
| <b>4c</b> _TS <sub>b-Na_2w</sub>  | $\text{HCO}_2\text{H} + \text{H}^+ + \text{CO}_2 + 2\text{H}_2\text{O}$                                           | 11.3                      | 16.1                             | 16.6                             | 16.1                                          | 12.8                                          |
| <b>3a</b> _d <sub>Na1_2w</sub>    | $\text{H}^+ + \text{CO}_2 + 2\text{H}_2\text{O} + \text{HCO}_3^- + \text{HCO}_2^-$                                | 5.2                       | 13.8                             | 9.0                              | 13.6                                          | 11.3                                          |
| <b>4c</b> _d <sub>Na1_2w</sub>    | $2\text{H}^+ + \text{CO}_2 + 2\text{H}_2\text{O} + \text{HCO}_3^- + \text{HCO}_2^-$                               | 11.5                      | 21.9                             | 12.4                             | 11.4                                          | 8.1                                           |
| <b>3a</b> <sub>Na_2w</sub>        | $\text{CO}_2 + 2\text{H}_2\text{O} + \text{HCO}_3^- + \text{HCO}_2\text{H} + \text{H}_2$                          | -8.3                      | 0.2                              | 0.2                              | 5.3                                           | 3.0                                           |
| <b>4c</b> <sub>Na_2w</sub>        | $\text{H}^+ + \text{CO}_2 + 2\text{H}_2\text{O} + \text{HCO}_3^- + \text{HCO}_2\text{H} + \text{H}_2$             | -2.8                      | 7.7                              | 2.9                              | 2.4                                           | -0.9                                          |
| <b>3a</b>                         | $\text{CO}_2 + \text{HCO}_3^- + \text{HCO}_2\text{H} + \text{H}_2 + \text{Na}(\text{H}_2\text{O})_4$              | -3.7                      | -1.8                             | -1.8                             | 3.2                                           | 0.9                                           |
| <b>4c</b>                         | $\text{H}^+ + \text{CO}_2 + \text{HCO}_3^- + \text{HCO}_2\text{H} + \text{H}_2 + \text{Na}(\text{H}_2\text{O})_4$ | 4.8                       | 8.6                              | 3.9                              | 3.3                                           | 0.1                                           |
| <b>4d</b>                         | $\text{H}^+ + \text{CO}_2 + \text{HCO}_3^- + \text{HCO}_2\text{H} + \text{H}_2 + \text{Na}(\text{H}_2\text{O})_4$ | 4.7                       | 8.5                              | 3.8                              | 3.2                                           | 0.0                                           |

<sup>a</sup>Free energies are relative to **3a** in Table S9 at 1 atm, 1 M, pH 3.5 and pH 7.6, and relative to **4d** at pH 8.3. <sup>b</sup>For  $\text{H}_2\text{O}$ , its free energy is calculated at 55.6 M (standard state). <sup>c</sup>At pH 7.6 and 8.3, the substrates  $\text{HCO}_2^-$  and  $\text{H}^+$  were used for  $\text{HCO}_2\text{H}$ .

**Table S11.** APT charge and Mulliken charge population of **3a\_fc**, **3a\_fc-Na<sub>2w</sub>** and **3aB\_fc-Na<sub>2w</sub>**.

| Atom            | 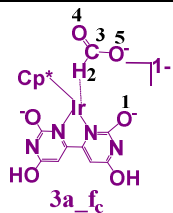 |                 |  |                 |  |                 |
|-----------------|-----------------------------------------------------------------------------------|-----------------|-----------------------------------------------------------------------------------|-----------------|-------------------------------------------------------------------------------------|-----------------|
|                 | APT charge                                                                        | Mulliken charge | APT charge                                                                        | Mulliken charge | APT charge                                                                          | Mulliken charge |
| O1              | -1.27                                                                             | -0.60           | -1.36                                                                             | -0.58           | -1.37                                                                               | -0.62           |
| Ir              | 0.75                                                                              | 0.32            | 0.79                                                                              | 0.46            | 0.72                                                                                | 0.43            |
| H2              | 0.11                                                                              | 0.15            | -0.24                                                                             | 0.05            | -0.22                                                                               | 0.03            |
| C3              | 1.74                                                                              | 0.39            | 1.83                                                                              | 0.41            | 1.78                                                                                | 0.43            |
| O4              | -1.33                                                                             | -0.64           | -1.30                                                                             | -0.60           | -1.24                                                                               | -0.62           |
| O5              | -1.24                                                                             | -0.63           | -1.33                                                                             | -0.57           | -1.32                                                                               | -0.58           |
| Na <sup>+</sup> | -                                                                                 | -               | 0.92                                                                              | 0.32            | 0.92                                                                                | 0.33            |

**Table S12.** APT charge and Mulliken charge population of **3a\_TSd**, **3a\_TSd-Na<sub>2w</sub>** and **3aB\_TSd-Na<sub>2w</sub>**.

| Atom            | 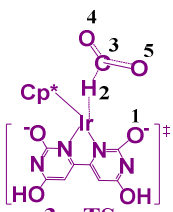 |                 |  |                 |  |                 |
|-----------------|-------------------------------------------------------------------------------------|-----------------|--------------------------------------------------------------------------------------|-----------------|---------------------------------------------------------------------------------------|-----------------|
|                 | APT charge                                                                          | Mulliken charge | APT charge                                                                           | Mulliken charge | APT charge                                                                            | Mulliken charge |
| O1              | -1.31                                                                               | -0.61           | -1.35                                                                                | -0.60           | -1.37                                                                                 | -0.64           |
| Ir              | 0.28                                                                                | 0.07            | 0.33                                                                                 | 0.25            | 0.29                                                                                  | 0.21            |
| H2              | -0.66                                                                               | -0.10           | -0.70                                                                                | -0.16           | -0.69                                                                                 | -0.16           |
| C3              | 2.91                                                                                | 0.60            | 2.88                                                                                 | 0.64            | 2.86                                                                                  | 0.65            |
| O4              | -1.38                                                                               | -0.42           | -1.34                                                                                | -0.38           | -1.34                                                                                 | -0.38           |
| O5              | -1.41                                                                               | -0.41           | -1.40                                                                                | -0.40           | -1.39                                                                                 | -0.40           |
| Na <sup>+</sup> | -                                                                                   | -               | 0.94                                                                                 | 0.36            | 0.94                                                                                  | 0.37            |

## Optimized geometries

### 3a

Ir 0.688966811 -0.003005093 -0.199042949  
N -0.984791682 1.307378007 -0.305080216  
N -0.989043312 -1.308716624 -0.272735329  
C -2.197546624 0.743574205 -0.047183723  
C -2.202953807 -0.735347286 -0.045264806  
C -3.327403877 1.507201662 0.137221849  
C -3.343126821 -1.490306733 0.110361693  
C -3.135904680 2.902540253 0.046391895  
C -3.159850511 -2.887155480 0.025149943  
N -1.996610814 3.479483865 -0.269388827  
N -2.016916500 -3.472755374 -0.259830973  
C -0.904057893 2.683893572 -0.532237876  
C -0.913031862 -2.685488194 -0.497639191  
C 2.790722285 0.708008536 -0.450104668  
C 2.780868062 -0.761021033 -0.416125641  
C 2.295511802 1.185421807 0.795652677  
C 1.893422220 0.026697047 1.583541826  
C 2.275216461 -1.172911131 0.848308038  
C 3.338386062 1.522804906 -1.576741631  
C 3.319307511 -1.634995759 -1.502061046  
C 2.268765021 2.595520796 1.292494608  
C 1.409286179 0.062825242 2.996210784  
C 2.219042339 -2.559286279 1.405562603  
O 0.142355823 -3.193460294 -0.927153982  
O 0.145167493 3.184079488 -0.984824586  
O -4.208217687 3.684449352 0.292019083  
O -4.244601881 -3.660965016 0.240117617  
H -4.300615356 1.087096603 0.346680831  
H -4.319759880 -1.062937726 0.286701041  
H 2.983314005 2.553594303 -1.539391117  
H 3.064111882 1.094351255 -2.544363451  
H 4.434285789 1.536833785 -1.522122553  
H 3.031607460 -1.263732875 -2.489371726  
H 2.338285374 3.317446078 0.479573262  
H 2.970602115 -2.663757572 -1.403262043  
H 1.361732926 2.805079058 1.864543539  
H 4.415827773 -1.640174105 -1.460029369  
H 3.124329330 2.747639996 1.962215574  
H 0.797431405 -0.810106941 3.234079772

H 1.320785982 -2.714932613 2.007913564  
H 0.827333086 0.964932801 3.197447097  
H 2.246997161 -3.317052291 0.623453073  
H 2.271871497 0.062116946 3.675362880  
H 3.085834995 -2.708952839 2.061250250  
H -3.934784729 4.610387428 0.169862272  
H -3.975640410 -4.588853279 0.122522536

### 4c

Ir 0.644203950 -0.026743323 -0.154979872  
N -0.860018736 1.396639494 -0.344611416  
N -1.101730829 -1.201952667 -0.342181593  
C -2.135845490 0.939727852 -0.095769481  
C -2.265620477 -0.531285448 -0.100126306  
C -3.176783995 1.795471076 0.102968562  
C -3.455323320 -1.199907736 0.093181459  
C -2.920409777 3.227347270 0.073077450  
C -3.377452136 -2.604337583 0.043271527  
N -1.678288729 3.662480352 -0.280105783  
N -2.288494481 -3.283408678 -0.254653750  
C -0.680157083 2.781663484 -0.532241961  
C -1.133962016 -2.588623609 -0.528485090  
C 2.794437880 0.477234611 -0.494318130  
C 2.650537990 -0.983465136 -0.465218440  
C 2.395777847 0.995567503 0.772006070  
C 1.925031899 -0.128639594 1.569682225  
C 2.163122776 -1.353266797 0.820469428  
C 3.363571162 1.244284048 -1.643744764  
C 3.065210935 -1.895846888 -1.574844960  
C 2.521763391 2.400222600 1.272046944  
C 1.489447143 -0.054750459 2.996666448  
C 1.987854469 -2.730350248 1.378448759  
O -0.124488653 -3.188687890 -0.951882196  
O 0.435233246 3.179807977 -0.964150376  
O -3.844898914 4.045112487 0.352280042  
O -4.509392844 -3.292947665 0.312145425  
H -4.180597044 1.444731856 0.307658318  
H -4.390285145 -0.696579498 0.293949718  
H 3.065865506 2.293304451 -1.614974839  
H 3.043442107 0.819622760 -2.598710543  
H 4.459580133 1.198167046 -1.613123185

|           |              |              |              |              |              |              |              |
|-----------|--------------|--------------|--------------|--------------|--------------|--------------|--------------|
| H         | 2.789905236  | -1.485901742 | -2.550240073 | O            | 3.842610869  | 4.046625997  | 0.353937395  |
| H         | 2.635895144  | 3.114516203  | 0.457305898  | H            | 4.391162325  | -0.694303502 | 0.292230111  |
| H         | 2.613389717  | -2.883526442 | -1.475495064 | H            | 4.179713695  | 1.446511849  | 0.308800986  |
| H         | 1.653002250  | 2.695721842  | 1.865829894  | H            | -2.611372013 | -2.883745378 | -1.477632145 |
| H         | 4.155670839  | -2.018358592 | -1.565882332 | H            | -2.786702757 | -1.485862340 | -2.552196525 |
| H         | 3.405783632  | 2.470999897  | 1.917823953  | H            | -4.153602091 | -2.018577835 | -1.569549243 |
| H         | 0.819815555  | -0.878292540 | 3.254035894  | H            | -3.042778646 | 0.818700627  | -2.600119741 |
| H         | 1.066532976  | -2.812254386 | 1.961225320  | H            | -1.971554543 | -3.490144924 | 0.595985183  |
| H         | 0.983922964  | 0.889430113  | 3.211175727  | H            | -3.063327266 | 2.292722679  | -1.616867245 |
| H         | 1.968493449  | -3.489047919 | 0.596862749  | H            | -1.067778029 | -2.813957812 | 1.959454222  |
| H         | 2.369085063  | -0.120461025 | 3.650384382  | H            | -4.458322718 | 1.199244894  | -1.614421928 |
| H         | 2.824825874  | -2.951272115 | 2.052323034  | H            | -2.826135884 | -2.951207482 | 2.052016890  |
| H         | -4.307132764 | -4.240422536 | 0.224607510  | H            | -0.988218558 | 0.887959519  | 3.212367624  |
| <b>4d</b> |              |              |              | H            | -1.654462535 | 2.694577788  | 1.865932448  |
| Ir        | -0.643955269 | -0.027030298 | -0.154382585 | H            | -0.822471823 | -0.879660357 | 3.253972975  |
| N         | 1.102374774  | -1.201853822 | -0.341106317 | H            | -2.636141745 | 3.113701673  | 0.456671500  |
| N         | 0.859400768  | 1.396724818  | -0.344907588 | H            | -2.372883671 | -0.123653648 | 3.649241010  |
| C         | 2.266057847  | -0.530461741 | -0.100022784 | H            | -3.407345202 | 2.470097348  | 1.916458036  |
| C         | 2.135446073  | 0.940464731  | -0.095664966 | H            | 4.310609176  | -4.238140000 | 0.222638366  |
| C         | 3.456350966  | -1.198269542 | 0.092381461  | <b>3a_fb</b> |              |              |              |
| C         | 3.175809595  | 1.796733189  | 0.103678667  | C            | -1.379048957 | -1.382668644 | -0.164414023 |
| C         | 3.379413335  | -2.602745803 | 0.042586914  | C            | -1.346556150 | 1.618738139  | 0.106343054  |
| C         | 2.918691529  | 3.228485927  | 0.074030659  | C            | -0.230793164 | -0.629479833 | -0.066243662 |
| N         | 2.290596933  | -3.282568546 | -0.254059421 | C            | -0.211203743 | 0.842920757  | 0.068395628  |
| N         | 1.676534920  | 3.663027701  | -0.279705347 | N            | 0.998189914  | -1.212696060 | -0.004979530 |
| C         | 1.135277677  | -2.588608908 | -0.526792210 | N            | 1.030901075  | 1.378970194  | 0.230580693  |
| C         | 0.678979627  | 2.781743733  | -0.532459215 | C            | 1.088790165  | -2.584408412 | 0.135747262  |
| C         | -2.649769762 | -0.983967192 | -0.466882517 | C            | 1.156224016  | 2.726433148  | 0.576119313  |
| C         | -2.793873873 | 0.476717926  | -0.495648486 | N            | -0.016440198 | -3.369889985 | -0.024486506 |
| C         | -2.163949187 | -1.354109517 | 0.819306318  | N            | 0.047692417  | 3.541502557  | 0.539840319  |
| C         | -1.926610016 | -0.129765429 | 1.569061850  | C            | -1.187019117 | -2.779416879 | -0.181030548 |
| C         | -2.396487150 | 0.994702267  | 0.771225650  | C            | -1.129287970 | 2.998196595  | 0.314749395  |
| C         | -3.063135323 | -1.896059421 | -1.577226098 | O            | -2.216325147 | 3.796951916  | 0.290849443  |
| C         | -3.362262560 | 1.244053296  | -1.645254267 | O            | -2.279223019 | -3.550417163 | -0.339066847 |
| C         | -1.989496273 | -2.731258030 | 1.377415282  | O            | 2.199384842  | -3.116068279 | 0.427164391  |
| C         | -1.492594577 | -0.056530382 | 2.996544150  | O            | 2.263312508  | 3.179732352  | 0.931530207  |
| C         | -2.522796795 | 2.399282210  | 1.271411842  | Ir           | 2.665131289  | 0.114014041  | -0.224868942 |
| O         | -0.436342527 | 3.179415428  | -0.964881561 | C            | 3.970290177  | 1.407271411  | -1.472555983 |
| O         | 0.125737574  | -3.189609182 | -0.948609067 | C            | 4.728950493  | 0.946113034  | -0.357664064 |
| O         | 4.512182750  | -3.290517891 | 0.310149943  | C            | 4.809489401  | -0.518129223 | -0.437245478 |



|                          |              |              |              |    |              |              |              |
|--------------------------|--------------|--------------|--------------|----|--------------|--------------|--------------|
| C                        | 4.083211506  | -0.948923811 | -1.580294917 | N  | 1.628969480  | 3.596631201  | 0.043139267  |
| C                        | 3.492404102  | 0.233309467  | -2.197610913 | N  | 2.360687993  | -3.284538704 | 0.494764708  |
| C                        | 3.990360051  | -2.334533547 | -2.135003649 | C  | 2.830927545  | 3.149721846  | -0.286100690 |
| C                        | 5.634629493  | -1.372578826 | 0.469299449  | C  | 3.467906689  | -2.605885140 | 0.326394662  |
| C                        | 5.439646978  | 1.775944884  | 0.662824287  | O  | 4.637790416  | -3.284464249 | 0.325593728  |
| C                        | 3.731395311  | 2.818848243  | -1.902904966 | O  | 3.765375597  | 4.047800616  | -0.635004309 |
| C                        | 2.736237528  | 0.252116908  | -3.485952196 | O  | -0.434730175 | 3.090806221  | 0.847387175  |
| O                        | 3.252574492  | -2.536612934 | 2.730348163  | O  | 0.087748749  | -3.194042113 | 0.758575124  |
| C                        | 3.337607119  | -1.246914519 | 3.027354454  | Ir | -0.601613309 | -0.134063849 | -0.052191847 |
| O                        | 3.842053185  | -0.841470426 | 4.061919371  | C  | -1.676384316 | -1.466265058 | -1.470090441 |
| H                        | 5.243358708  | -2.388496530 | 0.542281079  | C  | -2.523486482 | -1.187979595 | -0.353800664 |
| H                        | 2.985273251  | -2.551499604 | -2.505512958 | C  | -2.793021252 | 0.257114855  | -0.339915740 |
| H                        | 4.257643469  | -3.088195775 | -1.394248503 | C  | -2.068499716 | 0.856167745  | -1.408489428 |
| H                        | 4.681808882  | -2.426209197 | -2.981656755 | C  | -1.323546259 | -0.197857382 | -2.096063059 |
| H                        | 5.703712545  | -0.947688823 | 1.472874780  | C  | -2.094944596 | 2.297011876  | -1.812399591 |
| H                        | 6.654875235  | -1.433331034 | 0.068887320  | C  | -3.760529018 | 0.944062553  | 0.573395596  |
| H                        | 5.327533475  | 1.352295266  | 1.664826371  | C  | -3.108279942 | -2.188525050 | 0.592581147  |
| H                        | 5.069684499  | 2.801673021  | 0.676850467  | C  | -1.256226330 | -2.815053753 | -1.958706564 |
| H                        | 6.512167152  | 1.801813865  | 0.433527099  | C  | -0.547251511 | -0.031432802 | -3.364095275 |
| H                        | 3.905051972  | 3.528900567  | -1.095178856 | O  | -1.278912016 | 1.794812959  | 2.690721977  |
| H                        | 2.713493087  | 2.957446981  | -2.275972417 | C  | -1.274187888 | 0.523117438  | 2.750345693  |
| H                        | 4.418455534  | 3.055438121  | -2.724772495 | O  | -1.778972940 | -0.245095819 | 3.543608126  |
| H                        | 2.144327552  | -0.657179101 | -3.612459367 | H  | -3.482090808 | 1.982496462  | 0.759443810  |
| H                        | 3.442998719  | 0.312536331  | -4.323618797 | H  | -1.140376641 | 2.611526342  | -2.241107585 |
| H                        | 2.069760120  | 1.115212687  | -3.546665912 | H  | -2.306227154 | 2.951048030  | -0.966365940 |
| H                        | 2.832437509  | -2.682205603 | 1.820337860  | H  | -2.866965408 | 2.453752907  | -2.575419611 |
| H                        | 2.917779339  | -0.565996749 | 2.267150455  | H  | -3.840303641 | 0.437668650  | 1.536729262  |
| H                        | -1.920823402 | 4.709447648  | 0.455501690  | H  | -4.756699536 | 0.939865729  | 0.113399910  |
| H                        | -1.999699747 | -4.481946719 | -0.300821984 | H  | -3.202259719 | -1.771126505 | 1.598237251  |
| H                        | -2.369473321 | -0.953570281 | -0.217827049 | H  | -2.465324690 | -3.066373066 | 0.663223948  |
| H                        | -2.343889184 | 1.220735868  | -0.014559080 | H  | -4.105385562 | -2.498486155 | 0.256023615  |
| <b>3a_TS<sub>p</sub></b> |              |              |              | H  | -1.134969590 | -3.517531231 | -1.134953519 |
| C                        | 3.199150312  | 1.791081706  | -0.260733216 | H  | -0.310307793 | -2.768484129 | -2.503009496 |
| C                        | 3.542088092  | -1.204562462 | 0.145704742  | H  | -2.016893978 | -3.195824519 | -2.651634556 |
| C                        | 2.176524491  | 0.903261006  | -0.007835701 | H  | -0.071859467 | 0.950152597  | -3.421495215 |
| C                        | 2.325846625  | -0.562015735 | 0.104992269  | H  | -1.214229007 | -0.126770902 | -4.230232382 |
| N                        | 0.902354536  | 1.345127791  | 0.206156181  | H  | 0.232800614  | -0.789156003 | -3.462100898 |
| N                        | 1.153035476  | -1.232959121 | 0.240428806  | H  | -0.840674035 | 2.396764735  | 1.675930267  |
| C                        | 0.690345592  | 2.687357136  | 0.365758064  | H  | -0.654985456 | -0.003182316 | 1.879685103  |
| C                        | 1.149330232  | -2.617325688 | 0.513352428  | H  | 4.403444545  | -4.216098001 | 0.469068675  |

|              |              |              |              |             |              |              |              |
|--------------|--------------|--------------|--------------|-------------|--------------|--------------|--------------|
| H            | 3.352944113  | 4.925188492  | -0.575856762 | H           | 5.720937680  | 1.261823599  | 1.548506800  |
| H            | 4.216701194  | 1.484136958  | -0.454741087 | H           | 5.242937954  | 2.723679141  | 0.668009888  |
| H            | 4.491583859  | -0.696981794 | 0.059704747  | H           | 6.652759427  | 1.789009708  | 0.141974151  |
| <b>2b_fa</b> |              |              |              | H           | 3.886792613  | 3.472158187  | -0.943778083 |
| C            | -1.238686890 | -1.391209873 | -0.552282217 | H           | 2.556557345  | 2.930671488  | -1.982611871 |
| C            | -1.299170012 | 1.601177755  | -0.064509353 | H           | 4.200082876  | 3.008246740  | -2.624456358 |
| C            | -0.157766161 | -0.641318602 | -0.144577023 | H           | 1.735762209  | -0.689594473 | -3.201028991 |
| C            | -0.162394151 | 0.827922415  | 0.024741442  | H           | 2.927413747  | 0.273768922  | -4.084347437 |
| N            | 1.020886263  | -1.236380335 | 0.197857137  | H           | 1.683742168  | 1.082165748  | -3.119844470 |
| N            | 1.039697574  | 1.358978946  | 0.362791279  | H           | 2.607701175  | -2.589194411 | 1.559062987  |
| C            | 1.057712357  | -2.585136544 | 0.283825144  | H           | 3.080209028  | -0.169070842 | 2.231804389  |
| C            | 1.127883492  | 2.696159329  | 0.734194886  | H           | -1.929458258 | 4.674566126  | 0.337023710  |
| N            | 0.065095073  | -3.378616897 | -0.145433233 | H           | -1.761999980 | -4.481114726 | -1.003861713 |
| N            | 0.024601873  | 3.508525474  | 0.603512737  | H           | -2.183728140 | -0.955985948 | -0.845851747 |
| C            | -1.039565375 | -2.784218239 | -0.584004680 | H           | -2.271422670 | 1.203908129  | -0.318846610 |
| C            | -1.115563929 | 2.970976936  | 0.220476112  | <b>2b_f</b> |              |              |              |
| O            | -2.197447710 | 3.769540230  | 0.100916876  | C           | -1.347188448 | -1.282645873 | -0.381739880 |
| O            | -2.033823377 | -3.547791164 | -1.054534945 | C           | -1.290656009 | 1.689012094  | 0.126121348  |
| O            | 2.102835011  | -3.170058758 | 0.811867137  | C           | -0.216995963 | -0.575856439 | -0.031972949 |
| O            | 2.200048160  | 3.147354731  | 1.194724654  | C           | -0.164051821 | 0.893161424  | 0.117418809  |
| Ir           | 2.742676289  | 0.097704713  | 0.086259366  | N           | 0.958189880  | -1.208843387 | 0.248912304  |
| C            | 3.875658227  | 1.354505394  | -1.343016888 | N           | 1.077510091  | 1.396215787  | 0.315324931  |
| C            | 4.784533700  | 0.882822401  | -0.347524688 | C           | 0.943120681  | -2.556968643 | 0.299286290  |
| C            | 4.837470699  | -0.580580370 | -0.430337744 | C           | 1.231839859  | 2.743810432  | 0.628954599  |
| C            | 3.938097541  | -1.000156193 | -1.447560725 | N           | -0.096606402 | -3.315292101 | -0.068286539 |
| C            | 3.276546385  | 0.188344551  | -1.985449677 | N           | 0.135143629  | 3.575918679  | 0.597167682  |
| C            | 3.737471379  | -2.391622400 | -1.954414097 | C           | -1.206523369 | -2.680143131 | -0.430919177 |
| C            | 5.770797478  | -1.452395207 | 0.348581808  | C           | -1.051383554 | 3.057664178  | 0.357502125  |
| C            | 5.639582590  | 1.713095870  | 0.556077062  | O           | -2.122744999 | 3.881228915  | 0.341292012  |
| C            | 3.607985852  | 2.772579197  | -1.731488639 | O           | -2.255089590 | -3.404502124 | -0.840892495 |
| C            | 2.346493725  | 0.214794318  | -3.155197680 | O           | 2.003057153  | -3.202777487 | 0.739490837  |
| O            | 3.294696018  | -2.151075734 | 2.704619795  | O           | 2.356705883  | 3.193413382  | 0.940479961  |
| C            | 3.577341149  | -0.925010794 | 2.911246389  | Ir          | 2.726696943  | 0.058435469  | 0.045018296  |
| O            | 4.333920275  | -0.462838049 | 3.777873022  | C           | 3.656890909  | 1.127004169  | -1.645061472 |
| H            | 5.384818420  | -2.468225872 | 0.451750206  | C           | 4.642631767  | 0.942826549  | -0.608667408 |
| H            | 2.704054073  | -2.564507923 | -2.263326479 | C           | 4.864829760  | -0.492638185 | -0.462125683 |
| H            | 4.012110072  | -3.139791887 | -1.210257671 | C           | 4.000369476  | -1.174376301 | -1.362754026 |
| H            | 4.374026632  | -2.538846913 | -2.835686005 | C           | 3.203397650  | -0.177169413 | -2.073022475 |
| H            | 5.962734844  | -1.050248162 | 1.345157848  | C           | 3.977584046  | -2.642459685 | -1.645359780 |
| H            | 6.732409297  | -1.510453597 | -0.176939357 | C           | 5.897932624  | -1.104576378 | 0.430540636  |

|                       |              |              |              |                                   |              |              |              |
|-----------------------|--------------|--------------|--------------|-----------------------------------|--------------|--------------|--------------|
| C                     | 5.467917467  | 2.005123494  | 0.049612549  | O                                 | -2.088292322 | 3.909728468  | 0.495743799  |
| C                     | 3.207250059  | 2.431133760  | -2.223790353 | O                                 | -2.246490157 | -3.355691256 | -0.982149951 |
| C                     | 2.256089904  | -0.467385465 | -3.196801570 | O                                 | 1.975766495  | -3.219827406 | 0.696073975  |
| O                     | 3.403709788  | -2.053338107 | 2.525933454  | O                                 | 2.399561960  | 3.179761933  | 0.952663970  |
| C                     | 3.203216561  | -0.885573884 | 2.934232976  | Ir                                | 2.714304639  | 0.043179296  | 0.040116858  |
| O                     | 2.810375982  | 0.123825145  | 2.259214795  | C                                 | 3.656274762  | 1.112607046  | -1.643692428 |
| H                     | 5.701645000  | -2.161548845 | 0.617115062  | C                                 | 4.646046821  | 0.921783704  | -0.614530551 |
| H                     | 2.982135951  | -2.984825297 | -1.935172962 | C                                 | 4.854510645  | -0.514777550 | -0.467953892 |
| H                     | 4.315253643  | -3.231778090 | -0.791857944 | C                                 | 3.986361970  | -1.191429485 | -1.369417147 |
| H                     | 4.653663054  | -2.847821033 | -2.485251602 | C                                 | 3.192741550  | -0.188984541 | -2.074488359 |
| H                     | 5.952831457  | -0.586025120 | 1.390990963  | C                                 | 3.966313650  | -2.657748323 | -1.663633775 |
| H                     | 6.883561724  | -1.021220443 | -0.044370987 | C                                 | 5.886641416  | -1.133792563 | 0.421571048  |
| H                     | 5.688584964  | 1.748239261  | 1.089014399  | C                                 | 5.485079154  | 1.976725634  | 0.039249320  |
| H                     | 4.967025396  | 2.974125582  | 0.035882373  | C                                 | 3.211195243  | 2.420222675  | -2.219760358 |
| H                     | 6.425874420  | 2.112125380  | -0.474893424 | C                                 | 2.247557724  | -0.471543204 | -3.202641885 |
| H                     | 3.340588608  | 3.253886359  | -1.520991638 | O                                 | 3.418927849  | -2.053530320 | 2.535636841  |
| H                     | 2.157751127  | 2.397627971  | -2.525248932 | C                                 | 3.184818817  | -0.893540379 | 2.939589835  |
| H                     | 3.802728502  | 2.647520930  | -3.119252348 | O                                 | 2.793707187  | 0.113074966  | 2.255358047  |
| H                     | 1.695430497  | -1.388196115 | -3.016755504 | H                                 | 5.684866649  | -2.189838393 | 0.607739882  |
| H                     | 2.809857870  | -0.593464047 | -4.135419929 | H                                 | 2.971774560  | -2.999931830 | -1.956628851 |
| H                     | 1.541844980  | 0.346931771  | -3.339038273 | H                                 | 4.302921808  | -3.253395717 | -0.814051738 |
| H                     | 2.606231635  | -2.609182426 | 1.312794991  | H                                 | 4.644019428  | -2.856796860 | -2.503859794 |
| H                     | 3.378138510  | -0.677195110 | 4.004418977  | H                                 | 5.946749626  | -0.617152195 | 1.382784709  |
| H                     | -2.015784426 | -4.347619569 | -0.813708324 | H                                 | 6.872103084  | -1.055775199 | -0.054753553 |
| H                     | -1.805293241 | 4.782369251  | 0.525492316  | H                                 | 5.699624126  | 1.724511308  | 1.081230136  |
| H                     | -2.287598230 | -0.808166444 | -0.625103656 | H                                 | 4.997889158  | 2.952677250  | 0.018426927  |
| H                     | -2.291033821 | 1.304854860  | -0.012621302 | H                                 | 6.446298270  | 2.069064930  | -0.482324202 |
| <b>3f<sub>f</sub></b> |              |              |              | H                                 | 3.349376211  | 3.241193885  | -1.515706705 |
| C                     | -1.342398835 | -1.239198631 | -0.428629543 | H                                 | 2.160263617  | 2.391881411  | -2.517097908 |
| C                     | -1.278509407 | 1.714932707  | 0.210399059  | H                                 | 3.803525522  | 2.637036055  | -3.117239110 |
| C                     | -0.224853783 | -0.556971567 | -0.041129284 | H                                 | 1.679504201  | -1.388429043 | -3.025080882 |
| C                     | -0.159158859 | 0.906646532  | 0.152054469  | H                                 | 2.802188466  | -0.600690123 | -4.140493773 |
| N                     | 0.952238104  | -1.205559648 | 0.251098701  | H                                 | 1.538669394  | 0.347299376  | -3.346259480 |
| N                     | 1.089806265  | 1.400712342  | 0.331090683  | H                                 | 2.563469148  | -2.625046973 | 1.251598518  |
| C                     | 0.900081758  | -2.558281616 | 0.249906107  | H                                 | 3.322017908  | -0.679618073 | 4.015521708  |
| C                     | 1.261792499  | 2.741551433  | 0.665371560  | H                                 | -1.752255249 | 4.801182415  | 0.692843329  |
| N                     | -0.118491598 | -3.305223190 | -0.135004873 | H                                 | -2.268217953 | -0.730633520 | -0.667572047 |
| N                     | 0.172809904  | 3.581178778  | 0.682167246  | H                                 | -2.284435228 | 1.338718981  | 0.091066173  |
| C                     | -1.278608644 | -2.680152248 | -0.548762179 | <b>3f<sub>f<sub>r</sub></sub></b> |              |              |              |
| C                     | -1.023991426 | 3.073095778  | 0.463444451  | C                                 | 3.313798377  | 1.667753429  | -0.177687931 |

|    |              |              |              |              |              |              |              |
|----|--------------|--------------|--------------|--------------|--------------|--------------|--------------|
| C  | 3.431659562  | -1.330966083 | -0.337324397 | H            | -4.574669251 | -1.734802462 | 0.286805167  |
| C  | 2.221391673  | 0.853730816  | -0.063127547 | H            | -0.892412777 | -2.608146139 | -2.429256574 |
| C  | 2.259822242  | -0.621121901 | -0.158703738 | H            | -2.599481548 | -2.507186989 | -2.864637077 |
| N  | 0.978536392  | 1.360106135  | 0.236161803  | H            | -2.127480546 | -3.228899616 | -1.318155406 |
| N  | 1.063310674  | -1.240015622 | 0.009527299  | H            | -0.832377090 | -2.007966789 | 2.331795077  |
| C  | 0.940449057  | 2.669982964  | 0.537263137  | H            | 4.165677354  | -4.401386374 | -0.468231113 |
| C  | 1.019824072  | -2.630749135 | 0.108355704  | H            | 4.295671584  | 1.278041297  | -0.413834227 |
| N  | 1.924896472  | 3.539527838  | 0.453039043  | H            | 4.395120855  | -0.860625130 | -0.470171967 |
| N  | 2.165724321  | -3.365744397 | -0.093831823 | H            | -0.163239109 | 4.062887638  | 1.151699585  |
| C  | 3.164737820  | 3.091717220  | 0.031332632  | <b>3a_fr</b> |              |              |              |
| C  | 3.297551680  | -2.728773163 | -0.314414943 | C            | -3.422240630 | -1.421124942 | -0.156815677 |
| O  | 4.416966710  | -3.463052988 | -0.518811694 | C            | -3.314794764 | 1.560043107  | -0.369701463 |
| O  | 4.112252988  | 3.898712516  | -0.128899519 | C            | -2.247226766 | -0.697625072 | -0.081591705 |
| O  | -0.251032737 | 3.107426972  | 0.997205735  | C            | -2.192646683 | 0.776986800  | -0.182566957 |
| O  | -0.053155446 | -3.215671461 | 0.379859122  | N            | -1.055643635 | -1.291488664 | 0.166418589  |
| Ir | -0.682434581 | 0.016506744  | 0.028928650  | N            | -0.959387720 | 1.313798560  | -0.005487558 |
| C  | -2.772922691 | -0.718792713 | -0.255591751 | C            | -1.021502992 | -2.641332586 | 0.509230432  |
| C  | -2.781456941 | 0.741740188  | -0.155640688 | C            | -0.827109483 | 2.697425252  | 0.107225084  |
| C  | -2.026401050 | 1.258093414  | -1.255894705 | N            | -2.158574622 | -3.405250661 | 0.369479523  |
| C  | -1.487542641 | 0.138926659  | -2.007792107 | N            | -1.920410088 | 3.506434114  | -0.107957535 |
| C  | -2.025657647 | -1.074799832 | -1.420981657 | C            | -3.286756712 | -2.805723119 | 0.046519619  |
| C  | -0.759072328 | 0.232641392  | -3.314389309 | C            | -3.089083104 | 2.947037784  | -0.342957704 |
| C  | -1.865884674 | 2.691584392  | -1.654030896 | O            | -4.155159919 | 3.753108274  | -0.559058133 |
| C  | -3.553207153 | 1.526660558  | 0.859886976  | O            | -4.402169349 | -3.562294424 | -0.085235464 |
| C  | -3.537910054 | -1.647973179 | 0.635577418  | O            | 0.031527465  | -3.156683111 | 0.945824024  |
| C  | -1.893364608 | -2.435586457 | -2.027326930 | O            | 0.275468386  | 3.209700884  | 0.403413329  |
| C  | -0.709529465 | -1.075915146 | 2.910376714  | Ir           | 0.685463553  | -0.064500347 | 0.027641669  |
| O  | -0.778341885 | -1.091963910 | 4.148823326  | C            | 2.842082463  | 0.519211585  | -0.183005512 |
| O  | -0.481382830 | -0.007736908 | 2.213024262  | C            | 2.732155721  | -0.939699308 | -0.120548762 |
| H  | -0.842228170 | 2.911505146  | -1.967434206 | C            | 1.973361925  | -1.369191765 | -1.254712296 |
| H  | -0.132087755 | -0.645932888 | -3.485795528 | C            | 1.540264254  | -0.192445507 | -1.986484954 |
| H  | -0.121618572 | 1.119491205  | -3.350846508 | C            | 2.156921578  | 0.960984210  | -1.354401655 |
| H  | -1.472221273 | 0.299881982  | -4.145927976 | C            | 0.846330313  | -0.193917119 | -3.315327582 |
| H  | -2.139186592 | 3.376364450  | -0.851883025 | C            | 1.721647122  | -2.775004003 | -1.701010129 |
| H  | -2.520840575 | 2.892144867  | -2.511126531 | C            | 3.414521392  | -1.806551777 | 0.892406072  |
| H  | -3.179402611 | 2.548648419  | 0.948698540  | C            | 3.652755878  | 1.362315729  | 0.752486688  |
| H  | -3.499434833 | 1.057191673  | 1.845852711  | C            | 2.147647243  | 2.340997930  | -1.931394633 |
| H  | -4.611607906 | 1.578118772  | 0.575844130  | C            | 0.724052966  | 0.979878337  | 2.926311048  |
| H  | -3.567475734 | -1.279552949 | 1.664346799  | O            | 0.769953075  | 0.976957158  | 4.166079650  |
| H  | -3.100683516 | -2.648547485 | 0.641552091  | O            | 0.433998704  | -0.060407795 | 2.210733746  |

|              |              |              |              |              |              |              |              |
|--------------|--------------|--------------|--------------|--------------|--------------|--------------|--------------|
| H            | 0.703800012  | -2.900947663 | -2.078589433 | C            | -2.695248641 | -0.094840929 | -0.762445101 |
| H            | 0.288584322  | 0.732204704  | -3.475761025 | C            | -1.831516359 | 0.582065685  | -1.665407524 |
| H            | 0.148547013  | -1.030810131 | -3.398533987 | C            | -0.837512817 | -0.379113961 | -2.143224260 |
| H            | 1.577021116  | -0.286908120 | -4.129067016 | C            | -1.940416514 | 2.000296939  | -2.125745026 |
| H            | 1.884761048  | -3.498184493 | -0.902929847 | C            | -3.902156093 | 0.476226076  | -0.087335805 |
| H            | 2.408491044  | -3.010591735 | -2.523689474 | C            | -2.989432836 | -2.552049689 | 0.098448469  |
| H            | 2.959662804  | -2.797403398 | 0.946505287  | C            | -0.533539085 | -2.974863360 | -1.978494916 |
| H            | 3.372074486  | -1.357692395 | 1.888532958  | C            | 0.182647495  | -0.121672505 | -3.205663517 |
| H            | 4.472818278  | -1.933859577 | 0.632592833  | O            | -2.129561069 | 1.563430665  | 2.593724134  |
| H            | 3.619958096  | 0.970783626  | 1.772588235  | C            | -2.022929448 | 0.318470057  | 2.843870193  |
| H            | 3.300090607  | 2.395668704  | 0.769478403  | O            | -2.852545610 | -0.395505943 | 3.446329105  |
| H            | 4.703694531  | 1.370179390  | 0.436857798  | H            | -3.801775899 | 1.549453847  | 0.084293851  |
| H            | 1.171092615  | 2.604319168  | -2.343927211 | H            | -0.959487448 | 2.437024151  | -2.327044369 |
| H            | 2.871500461  | 2.372981367  | -2.755915848 | H            | -2.459192434 | 2.625934884  | -1.398685435 |
| H            | 2.433076549  | 3.096985437  | -1.200415069 | H            | -2.510921883 | 2.024439407  | -3.062536363 |
| H            | 0.925052123  | 1.907996046  | 2.362901604  | H            | -4.098545055 | -0.011191009 | 0.869200750  |
| H            | -3.843984607 | 4.673059548  | -0.503251681 | H            | -4.779638775 | 0.319429616  | -0.727710663 |
| H            | -4.385524468 | -0.972485205 | -0.352030867 | H            | -3.221795891 | -2.190421605 | 1.104153359  |
| H            | -4.305664255 | 1.154270856  | -0.514023776 | H            | -2.387963516 | -3.458284891 | 0.189022087  |
| H            | -4.158857977 | -4.484133993 | 0.107081779  | H            | -3.937117785 | -2.818580072 | -0.385692300 |
| <b>3f_fa</b> |              |              |              | H            | -0.721352813 | -3.763002270 | -1.249488473 |
| C            | 2.881205239  | 2.259016067  | -0.143246571 | H            | 0.547082381  | -2.858005061 | -2.091552550 |
| C            | 3.712324491  | -0.632172106 | 0.333234983  | H            | -0.933608381 | -3.301236651 | -2.946440957 |
| C            | 2.024560255  | 1.237480526  | 0.144349984  | H            | 0.569904309  | 0.898155982  | -3.148062770 |
| C            | 2.408896150  | -0.182753678 | 0.285280323  | H            | -0.274102127 | -0.251483491 | -4.195094235 |
| N            | 0.686732112  | 1.468012236  | 0.381458753  | H            | 1.021780567  | -0.816975775 | -3.131241562 |
| N            | 1.360973573  | -1.032791496 | 0.435556173  | H            | -1.322162816 | 2.293413112  | 1.499147535  |
| C            | 0.300351659  | 2.766232920  | 0.463505086  | H            | -1.084209863 | -0.178660422 | 2.488529515  |
| C            | 1.585708424  | -2.368033827 | 0.757040235  | H            | 5.074700108  | -3.459948862 | 0.712064455  |
| N            | 1.050498447  | 3.813167789  | 0.176193803  | H            | 3.931881203  | 2.086601633  | -0.340933848 |
| N            | 2.869915073  | -2.858181822 | 0.751509224  | H            | 4.567386066  | 0.020635487  | 0.229496282  |
| C            | 2.360424087  | 3.610644766  | -0.212906706 | <b>3a_fc</b> |              |              |              |
| C            | 3.863982285  | -2.016483109 | 0.542567766  | C            | 3.334579703  | 1.577413194  | -0.315083500 |
| O            | 5.125584985  | -2.503142420 | 0.543761023  | C            | 3.467242651  | -1.415194524 | -0.052785294 |
| O            | 3.072436154  | 4.579226777  | -0.576096235 | C            | 2.227005796  | 0.774688854  | -0.149262516 |
| O            | -0.943182283 | 3.017991868  | 0.878108408  | C            | 2.291164348  | -0.698424728 | -0.028464361 |
| O            | 0.622341251  | -3.107782293 | 1.062088196  | N            | 0.979297263  | 1.296888195  | -0.013526189 |
| Ir           | -0.554495913 | -0.240835807 | -0.039488500 | N            | 1.090159358  | -1.300934081 | 0.183248503  |
| C            | -1.191387616 | -1.687699004 | -1.595805730 | C            | 0.818814120  | 2.676731812  | 0.105814627  |
| C            | -2.286310080 | -1.502107042 | -0.702547308 | C            | 1.052362224  | -2.650466551 | 0.534053520  |

|    |              |              |              |                             |              |              |              |
|----|--------------|--------------|--------------|-----------------------------|--------------|--------------|--------------|
| N  | 1.892721367  | 3.504364815  | -0.132307489 | H                           | 4.337937676  | 1.192256250  | -0.426999948 |
| N  | 2.198764990  | -3.407814095 | 0.444345403  | H                           | 4.435638652  | -0.964594382 | -0.216047333 |
| C  | 3.075443752  | 2.963283661  | -0.334565653 | <b>3a_TS<sub>asso</sub></b> |              |              |              |
| C  | 3.332978233  | -2.802674197 | 0.161070207  | C                           | 3.461180109  | -1.162089287 | 0.213941427  |
| O  | 4.458032634  | -3.546254593 | 0.081320383  | C                           | 3.095805377  | 1.797967177  | 0.385903931  |
| O  | 4.125610077  | 3.781210001  | -0.566378979 | C                           | 2.244511141  | -0.536111060 | 0.029137641  |
| O  | -0.286403155 | 3.154250061  | 0.437953636  | C                           | 2.062255126  | 0.926776107  | 0.107538693  |
| O  | -0.011604582 | -3.163955490 | 0.939155764  | N                           | 1.126778025  | -1.229107681 | -0.304245114 |
| Ir | -0.634323200 | -0.088885470 | -0.116167187 | N                           | 0.807047292  | 1.363587786  | -0.175465159 |
| C  | -2.768850616 | -0.781242246 | -0.073902711 | C                           | 1.223366867  | -2.590493424 | -0.606915456 |
| C  | -2.728730808 | 0.671816840  | -0.288740799 | C                           | 0.567254407  | 2.734311292  | -0.283361642 |
| C  | -2.039042957 | 0.913934194  | -1.511744334 | N                           | 2.406350533  | -3.249214107 | -0.364613688 |
| C  | -1.579301049 | -0.371261257 | -2.029637978 | N                           | 1.572033475  | 3.625594937  | 0.018097398  |
| C  | -2.107031210 | -1.416872359 | -1.161718789 | C                           | 3.453883917  | -2.556192959 | 0.032898156  |
| C  | -0.916343944 | -0.591280382 | -3.350557789 | C                           | 2.761156869  | 3.162806054  | 0.340913749  |
| C  | -1.868284291 | 2.216842809  | -2.225102431 | O                           | 3.739800996  | 4.048548973  | 0.635827825  |
| C  | -3.427557498 | 1.674695173  | 0.573751029  | O                           | 4.611164990  | -3.215544379 | 0.267294290  |
| C  | -3.474233831 | -1.445096295 | 1.065024101  | O                           | 0.252993150  | -3.204808955 | -1.097432065 |
| C  | -2.027181015 | -2.880212238 | -1.459781248 | O                           | -0.547692924 | 3.156932930  | -0.654001557 |
| C  | -0.928413217 | 0.479477014  | 3.207059158  | Ir                          | -0.694067167 | -0.168621644 | -0.235224418 |
| O  | -2.050263414 | 0.665706470  | 3.753163520  | C                           | -2.590297433 | 0.754966015  | 0.703965555  |
| O  | 0.152861524  | 1.087005003  | 3.435472928  | C                           | -2.867112017 | -0.558949286 | 0.208405862  |
| H  | -0.889429578 | 2.286839146  | -2.705911590 | C                           | -2.063326820 | -1.497493206 | 0.965811198  |
| H  | -0.308545701 | -1.498941071 | -3.345516696 | C                           | -1.366262273 | -0.754643249 | 2.000513119  |
| H  | -0.279854286 | 0.252997196  | -3.624418825 | C                           | -1.669576957 | 0.618223715  | 1.830909213  |
| H  | -1.680850411 | -0.703062483 | -4.130264607 | C                           | -0.489434246 | -1.376555184 | 3.042945485  |
| H  | -1.987575016 | 3.069452199  | -1.557502142 | C                           | -2.198216345 | -2.989475948 | 0.936578307  |
| H  | -2.627734038 | 2.286858038  | -3.013882692 | C                           | -3.917035455 | -0.920290594 | -0.796614298 |
| H  | -3.109462039 | 2.693086530  | 0.345911719  | C                           | -3.360575258 | 1.989407117  | 0.343247667  |
| H  | -3.245505915 | 1.483522187  | 1.634042774  | C                           | -1.195631901 | 1.752499977  | 2.683068654  |
| H  | -4.509761040 | 1.611660513  | 0.403823835  | C                           | -0.743885250 | 0.541290608  | -2.474315810 |
| H  | -3.316610974 | -0.904185832 | 2.002107423  | O                           | 0.361505831  | 0.509007864  | -3.013111374 |
| H  | -3.143699367 | -2.477072700 | 1.197330284  | O                           | -1.869193602 | 0.902935927  | -2.820317609 |
| H  | -4.553620786 | -1.458611333 | 0.867097150  | H                           | -1.264128477 | -3.486530634 | 1.204342885  |
| H  | -1.043153973 | -3.157360310 | -1.845795607 | H                           | 0.137065994  | -0.634378023 | 3.542107830  |
| H  | -2.768131936 | -3.124887898 | -2.230989229 | H                           | 0.161813856  | -2.141423249 | 2.608851738  |
| H  | -2.236813764 | -3.489630130 | -0.581043601 | H                           | -1.102172433 | -1.867340911 | 3.809218366  |
| H  | -0.887403984 | -0.329083350 | 2.427245987  | H                           | -2.510410661 | -3.349030177 | -0.045218196 |
| H  | 4.217909839  | -4.470482650 | 0.268015578  | H                           | -2.961060503 | -3.294743348 | 1.664205794  |
| H  | 3.799365016  | 4.697243075  | -0.532700086 | H                           | -3.681408018 | -1.859831133 | -1.300812291 |

|               |              |              |              |             |              |              |              |
|---------------|--------------|--------------|--------------|-------------|--------------|--------------|--------------|
| H             | -4.037787185 | -0.142149891 | -1.551816855 | C           | 2.080672337  | 2.805235715  | -1.454112566 |
| H             | -4.880306884 | -1.044796274 | -0.286418760 | C           | 0.312411474  | -0.752998535 | 3.105392668  |
| H             | -3.611802452 | 2.005857097  | -0.719627151 | O           | 1.424213219  | -0.825592978 | 3.544350789  |
| H             | -2.806067899 | 2.898753986  | 0.576155646  | O           | -0.870465086 | -0.906232377 | 3.208309434  |
| H             | -4.300804527 | 2.012300198  | 0.909072158  | H           | 1.037981627  | -2.371673639 | -2.629119477 |
| H             | -0.249449162 | 1.523111061  | 3.178080807  | H           | 0.530777162  | 1.379295966  | -3.429164286 |
| H             | -1.938683819 | 1.961904090  | 3.462943115  | H           | 0.500935887  | -0.375441176 | -3.652486913 |
| H             | -1.071061408 | 2.666214885  | 2.098161754  | H           | 1.925728481  | 0.553169795  | -4.130407606 |
| H             | -0.954281077 | -1.055809876 | -1.519082140 | H           | 2.015390719  | -3.119534976 | -1.356692742 |
| H             | 3.365199678  | 4.942900961  | 0.555902899  | H           | 2.794224881  | -2.438380310 | -2.792667778 |
| H             | 4.458727115  | -4.158819204 | 0.085441192  | H           | 3.081151228  | -2.686907743 | 0.601702375  |
| H             | 4.366557812  | -0.634693200 | 0.476797633  | H           | 3.446690840  | -1.402237192 | 1.760159650  |
| H             | 4.100779986  | 1.474041526  | 0.614054885  | H           | 4.559683191  | -1.733002101 | 0.429011257  |
| <b>3a_TSa</b> |              |              |              | H           | 3.448398219  | 0.948056722  | 2.058987844  |
| C             | -3.331342674 | -1.446911838 | -0.511649843 | H           | 3.137764716  | 2.490902540  | 1.251140743  |
| C             | -3.358220516 | 1.545407579  | -0.267773445 | H           | 4.600243285  | 1.570509297  | 0.872139709  |
| C             | -2.196067484 | -0.692080393 | -0.280937060 | H           | 1.117790415  | 3.062023601  | -1.903680962 |
| C             | -2.211265664 | 0.780819111  | -0.157310052 | H           | 2.860751897  | 3.053634056  | -2.184815133 |
| N             | -0.984946074 | -1.262347982 | -0.066663410 | H           | 2.228981029  | 3.433102723  | -0.575711476 |
| N             | -1.012873512 | 1.327466582  | 0.159856206  | H           | 0.497479171  | -0.055714408 | 1.692198665  |
| C             | -0.901437732 | -2.644728896 | 0.087886025  | H           | -4.000773730 | 4.624278716  | 0.046236614  |
| C             | -0.952060867 | 2.667307519  | 0.537682404  | H           | -3.914997906 | -4.545552361 | -0.720029315 |
| N             | -1.992518133 | -3.426790504 | -0.212084190 | H           | -4.306483353 | -1.014582839 | -0.684046608 |
| N             | -2.055425229 | 3.471219020  | 0.367530362  | H           | -4.325329716 | 1.132944483  | -0.516698743 |
| C             | -3.135824319 | -2.837755367 | -0.500995036 | <b>3a_h</b> |              |              |              |
| C             | -3.187558261 | 2.918067550  | -0.021378978 | C           | 3.408083642  | -1.344386858 | 0.171332308  |
| O             | -4.269528261 | 3.717470378  | -0.180765951 | C           | 3.242681036  | 1.636476438  | 0.195962198  |
| O             | -4.203290244 | -3.619377007 | -0.791955508 | C           | 2.224537381  | -0.655334136 | -0.030760243 |
| O             | 0.155904698  | -3.172276486 | 0.502714110  | C           | 2.149095601  | 0.820492098  | -0.039980612 |
| O             | 0.097057743  | 3.135253343  | 1.035738483  | N           | 1.056659110  | -1.286505653 | -0.303650649 |
| Ir            | 0.689980571  | 0.049532466  | 0.030487710  | N           | 0.932893515  | 1.321751809  | -0.361079363 |
| C             | 2.812205606  | 0.757397329  | 0.011174681  | C           | 1.074236782  | -2.662706828 | -0.534637445 |
| C             | 2.783117281  | -0.692548614 | -0.163320483 | C           | 0.791483451  | 2.696726019  | -0.551356390 |
| C             | 2.126875189  | -0.963526048 | -1.412855948 | N           | 2.210784389  | -3.386959579 | -0.256477315 |
| C             | 1.728031621  | 0.287817025  | -2.008398089 | N           | 1.843242894  | 3.538044613  | -0.275463113 |
| C             | 2.168648601  | 1.345783076  | -1.126787625 | C           | 3.308716939  | -2.740572191 | 0.081031311  |
| C             | 1.134928256  | 0.469973872  | -3.372850709 | C           | 2.998716935  | 3.012892105  | 0.082514783  |
| C             | 1.976863035  | -2.299572881 | -2.073690350 | O           | 4.025938203  | 3.856471465  | 0.349891459  |
| C             | 3.498562871  | -1.683212467 | 0.705684697  | O           | 4.423791544  | -3.465787642 | 0.344199721  |
| C             | 3.532179945  | 1.482246293  | 1.109037536  | O           | 0.063312468  | -3.240054254 | -0.995752514 |

|             |              |              |              |    |              |              |              |
|-------------|--------------|--------------|--------------|----|--------------|--------------|--------------|
| O           | -0.287682521 | 3.165512308  | -0.982301369 | C  | -0.954399576 | -2.632016562 | -0.617524645 |
| Ir          | -0.705235887 | -0.054642967 | -0.364429211 | N  | -2.039674487 | 3.507758845  | -0.311461394 |
| C           | -2.716734693 | 0.876799007  | -0.090274755 | N  | -2.036748736 | -3.422894671 | -0.313780555 |
| C           | -2.882981776 | -0.533637893 | -0.385340354 | C  | -3.243907647 | 2.978531107  | 0.114557745  |
| C           | -2.300716766 | -1.277879686 | 0.692990540  | C  | -3.152664779 | -2.844887297 | 0.086095963  |
| C           | -1.834571880 | -0.338464064 | 1.704802370  | O  | -4.210421227 | -3.636840583 | 0.390041729  |
| C           | -2.099831265 | 0.970377334  | 1.225243614  | O  | -4.213983525 | 3.732917118  | 0.377375433  |
| C           | -1.274698126 | -0.724886134 | 3.041914198  | O  | 0.125838086  | 3.217989860  | -0.972717371 |
| C           | -2.397297902 | -2.759657256 | 0.899525159  | O  | 0.083260850  | -3.149734589 | -1.093378717 |
| C           | -3.664169675 | -1.101335576 | -1.534435846 | Ir | 0.705051188  | 0.028139301  | -0.364699102 |
| C           | -3.392333683 | 2.000392758  | -0.822536615 | C  | 2.650480220  | -1.017923126 | -0.092354385 |
| C           | -1.846298569 | 2.253103388  | 1.957582275  | C  | 2.904174034  | 0.390056790  | -0.336568663 |
| H           | -1.507325711 | -3.163924195 | 1.387814764  | C  | 2.344905299  | 1.128889442  | 0.758302772  |
| H           | -0.681883073 | 0.081602323  | 3.480897635  | C  | 1.811777125  | 0.185996902  | 1.731942340  |
| H           | -0.636209139 | -1.610042444 | 2.967993384  | C  | 2.000047131  | -1.118704748 | 1.207529033  |
| H           | -2.079395920 | -0.965472287 | 3.749463964  | C  | 1.256722899  | 0.556510786  | 3.075535538  |
| H           | -2.541060540 | -3.294289224 | -0.040393726 | C  | 2.503717969  | 2.598436635  | 1.011276255  |
| H           | -3.256111083 | -2.979200908 | 1.547402762  | C  | 3.740773555  | 0.946281704  | -1.451626821 |
| H           | -3.296860548 | -2.088966875 | -1.823620249 | C  | 3.267948809  | -2.157213494 | -0.851783831 |
| H           | -3.615855180 | -0.451832065 | -2.411778524 | C  | 1.644681878  | -2.402792342 | 1.894403192  |
| H           | -4.721455141 | -1.207058161 | -1.258883322 | H  | 1.610685224  | 3.032256189  | 1.468321435  |
| H           | -3.422660823 | 1.816655343  | -1.899864860 | H  | 0.608845502  | -0.227470650 | 3.475853218  |
| H           | -2.887750984 | 2.954121644  | -0.658185018 | H  | 0.676620958  | 1.482746403  | 3.028379242  |
| H           | -4.429229864 | 2.110520471  | -0.477356904 | H  | 2.064705686  | 0.718640199  | 3.801458679  |
| H           | -1.111338641 | 2.127157965  | 2.756453311  | H  | 2.721648017  | 3.149906778  | 0.095399657  |
| H           | -2.777712685 | 2.607190033  | 2.417649648  | H  | 3.338688984  | 2.758312749  | 1.705766583  |
| H           | -1.493570120 | 3.036525097  | 1.283630734  | H  | 3.460062556  | 1.973467528  | -1.695885621 |
| H           | -0.540763637 | -0.127684915 | -1.960914259 | H  | 3.650048211  | 0.345068865  | -2.359392112 |
| H           | 3.698934625  | 4.762474270  | 0.213294733  | H  | 4.799679608  | 0.950841310  | -1.162289316 |
| H           | 4.197995628  | -4.402908732 | 0.214899430  | H  | 3.371816216  | -1.920632141 | -1.913944392 |
| H           | 4.349334244  | -0.858833914 | 0.384672147  | H  | 2.675486828  | -3.069859051 | -0.766644740 |
| H           | 4.220640615  | 1.257630612  | 0.454809370  | H  | 4.271655007  | -2.374160368 | -0.462293555 |
| <b>3f_h</b> |              |              |              | H  | 0.823043593  | -2.268140280 | 2.602439896  |
| C           | -3.328785082 | 1.539248298  | 0.206690979  | H  | 2.509897687  | -2.774623599 | 2.457898654  |
| C           | -3.326574461 | -1.459410205 | 0.210294000  | H  | 1.358934495  | -3.176357420 | 1.179268150  |
| C           | -2.210310495 | 0.782211317  | -0.016183004 | H  | 0.568056174  | 0.145713902  | -1.959755187 |
| C           | -2.201051432 | -0.695354998 | -0.046064440 | H  | -3.934043722 | -4.559217568 | 0.253735319  |
| N           | -0.997658023 | 1.356833080  | -0.319023568 | H  | -0.013856166 | 4.176861647  | -1.048625552 |
| N           | -1.017942795 | -1.254966375 | -0.401875874 | H  | -4.285133368 | 1.089766090  | 0.441141325  |
| C           | -1.027811089 | 2.687603187  | -0.508456612 | H  | -4.277514351 | -1.034397829 | 0.497027798  |



**2b\_h**

|    |              |              |              |
|----|--------------|--------------|--------------|
| C  | 3.436819710  | -1.285218234 | 0.179867138  |
| C  | 3.208097700  | 1.696464811  | 0.218518344  |
| C  | 2.247964751  | -0.607841569 | -0.014719752 |
| C  | 2.135590348  | 0.862904703  | -0.038054698 |
| N  | 1.084775321  | -1.270657151 | -0.281503756 |
| N  | 0.914043410  | 1.333605538  | -0.389877991 |
| C  | 1.180026969  | -2.598918208 | -0.453292972 |
| C  | 0.758045851  | 2.703549561  | -0.610196142 |
| N  | 2.274614470  | -3.333943050 | -0.272001668 |
| N  | 1.782310264  | 3.565902163  | -0.294551281 |
| C  | 3.386323847  | -2.680428828 | 0.064689122  |
| C  | 2.935739389  | 3.069851738  | 0.103897059  |
| O  | 3.933492934  | 3.928608974  | 0.417560053  |
| O  | 4.505181205  | -3.381593285 | 0.277780351  |
| O  | 0.071300483  | -3.214737908 | -0.863046723 |
| O  | -0.305263272 | 3.147163603  | -1.098050647 |
| Ir | -0.713345995 | -0.065872356 | -0.356605326 |
| C  | -2.722878433 | 0.842460283  | -0.135374477 |
| C  | -2.882385531 | -0.582011307 | -0.365544871 |
| C  | -2.297475461 | -1.268346769 | 0.748167551  |
| C  | -1.846788962 | -0.281032227 | 1.720923742  |
| C  | -2.112693134 | 1.001947515  | 1.179934273  |
| C  | -1.294108460 | -0.600744892 | 3.078177777  |
| C  | -2.361160299 | -2.742106783 | 1.015113021  |
| C  | -3.653660776 | -1.205501031 | -1.491466880 |
| C  | -3.398420156 | 1.927460980  | -0.923659461 |
| C  | -1.861684390 | 2.314399886  | 1.857970039  |
| H  | -1.453245118 | -3.108886538 | 1.500280767  |
| H  | -0.711877465 | 0.230424785  | 3.483755847  |
| H  | -0.650291957 | -1.484624489 | 3.051262655  |
| H  | -2.104792151 | -0.812841410 | 3.787785221  |
| H  | -2.519108600 | -3.317394547 | 0.101723980  |
| H  | -3.200709595 | -2.948613768 | 1.691511381  |
| H  | -3.295361966 | -2.212006147 | -1.719527942 |
| H  | -3.586930704 | -0.606367943 | -2.402537908 |
| H  | -4.715045559 | -1.282637596 | -1.222610207 |
| H  | -3.441029027 | 1.681303085  | -1.987809431 |
| H  | -2.884629601 | 2.884407797  | -0.819035527 |

|   |              |              |              |
|---|--------------|--------------|--------------|
| H | -4.430299336 | 2.062252692  | -0.573358057 |
| H | -1.050324803 | 2.244068257  | 2.586636083  |
| H | -2.764375112 | 2.631470832  | 2.395436422  |
| H | -1.612671083 | 3.097349341  | 1.139480819  |
| H | -0.556003840 | -0.180208749 | -1.951172692 |
| H | 3.596874278  | 4.832268932  | 0.290434710  |
| H | 0.257672436  | -4.166117211 | -0.945450018 |
| H | 4.319615145  | -4.327011003 | 0.140069446  |
| H | 4.370762134  | -0.784795759 | 0.392091999  |
| H | 4.187400859  | 1.338909400  | 0.501548283  |

**2b\_TS<sub>w</sub>**

|    |              |              |              |
|----|--------------|--------------|--------------|
| Ir | 2.805851900  | 0.045472789  | 0.258443466  |
| N  | 1.094606392  | -1.265452615 | 0.259294637  |
| N  | 1.125593103  | 1.339751945  | 0.431690414  |
| C  | -0.072787182 | -0.657468238 | -0.087404440 |
| C  | -0.066450952 | 0.815570376  | 0.055816998  |
| C  | -1.180212763 | -1.379736353 | -0.481079262 |
| C  | -1.188900627 | 1.604278457  | -0.101521531 |
| C  | -1.011996158 | -2.775157348 | -0.505442308 |
| C  | -0.997483505 | 2.975287385  | 0.153063221  |
| N  | 0.081740631  | -3.395972998 | -0.103670967 |
| N  | 0.131324528  | 3.506301507  | 0.579073634  |
| C  | 1.136173807  | -2.646037689 | 0.332402988  |
| C  | 1.215386878  | 2.683582829  | 0.782084373  |
| C  | 4.909371466  | -0.602838475 | -0.252874947 |
| C  | 4.844503108  | 0.855287687  | -0.204327343 |
| C  | 4.045493611  | -1.045422803 | -1.302062726 |
| C  | 3.407486429  | 0.116644672  | -1.894686456 |
| C  | 3.955841380  | 1.286308709  | -1.245247262 |
| C  | 5.833811400  | -1.455636326 | 0.561260769  |
| C  | 5.708799049  | 1.732252930  | 0.650534569  |
| C  | 3.891173167  | -2.449095636 | -1.795716471 |
| C  | 2.520603705  | 0.111473197  | -3.102836970 |
| C  | 3.687492643  | 2.698455152  | -1.659874518 |
| O  | 2.270927921  | 3.136392645  | 1.279414940  |
| O  | 2.153110403  | -3.234422620 | 0.809332099  |
| O  | -2.043955635 | -3.519014471 | -0.953929031 |
| O  | -2.057007119 | 3.792195356  | -0.045046339 |
| O  | 3.146063376  | -1.974623822 | 2.806355438  |
| H  | 5.444554884  | -2.468277032 | 0.686357566  |

|                          |              |              |              |                          |              |              |              |
|--------------------------|--------------|--------------|--------------|--------------------------|--------------|--------------|--------------|
| H                        | 6.003996734  | -1.028217428 | 1.551992203  | C                        | 3.971332322  | 1.287592471  | -1.238881606 |
| H                        | 6.807981171  | -1.531673431 | 0.061972950  | C                        | 5.828064695  | -1.487831291 | 0.533842283  |
| H                        | 5.261989867  | 2.717909562  | 0.796321261  | C                        | 5.753180964  | 1.701952810  | 0.633934657  |
| H                        | 4.139284249  | -3.182681127 | -1.028441762 | C                        | 3.837325984  | -2.446876935 | -1.796576410 |
| H                        | 6.688381718  | 1.873811238  | 0.176909039  | C                        | 2.494404120  | 0.139915502  | -3.084036984 |
| H                        | 2.876538797  | -2.644732241 | -2.150285276 | C                        | 3.719198246  | 2.704357413  | -1.650868862 |
| H                        | 5.878447109  | 1.286918718  | 1.633815122  | O                        | 2.242252788  | 3.155777435  | 1.255063506  |
| H                        | 4.571468604  | -2.600829923 | -2.643277549 | O                        | 2.211172863  | -3.203251333 | 0.948189990  |
| H                        | 1.836467116  | 0.963694067  | -3.100502527 | O                        | -1.866778756 | -3.611873123 | -1.049954844 |
| H                        | 2.662335229  | 2.830118433  | -2.014138395 | O                        | -2.108689418 | 3.727937673  | -0.031072021 |
| H                        | 1.924908595  | -0.802894174 | -3.157247611 | O                        | 3.132827304  | -1.881405039 | 2.873502877  |
| H                        | 3.870405769  | 3.406057333  | -0.851362188 | H                        | 5.432369101  | -2.499075229 | 0.650092558  |
| H                        | 3.120471492  | 0.169739276  | -4.019943479 | H                        | 6.009235903  | -1.074282471 | 1.528667695  |
| H                        | 4.357037146  | 2.951343591  | -2.491658940 | H                        | 6.798181394  | -1.565869346 | 0.026728560  |
| H                        | 2.808365877  | 0.146912608  | 1.962453074  | H                        | 5.317661414  | 2.691128416  | 0.791130124  |
| H                        | 2.974534006  | -0.784706588 | 2.126103654  | H                        | 4.061862225  | -3.183172098 | -1.024585570 |
| H                        | 2.765720069  | -2.547714131 | 2.053817705  | H                        | 6.730162146  | 1.837450883  | 0.153066049  |
| H                        | 2.476627784  | -1.985865044 | 3.510364978  | H                        | 2.820181743  | -2.620141571 | -2.155534553 |
| H                        | -1.782942096 | 4.695522293  | 0.189590999  | H                        | 5.927355287  | 1.248104140  | 1.612606465  |
| H                        | -1.781083166 | -4.454743477 | -0.908553416 | H                        | 4.518784021  | -2.618952642 | -2.639297159 |
| H                        | -2.116228925 | -0.922178861 | -0.767878865 | H                        | 1.820874800  | 1.000622726  | -3.068944607 |
| H                        | -2.154250901 | 1.216094509  | -0.392651331 | H                        | 2.686207446  | 2.855527523  | -1.973770217 |
| <b>3f_TS<sub>w</sub></b> |              |              |              | H                        | 1.885414528  | -0.765798511 | -3.137672465 |
| Ir                       | 2.814771506  | 0.058397457  | 0.273457656  | H                        | 3.939559784  | 3.410612806  | -0.850272295 |
| N                        | 1.132885956  | -1.269456310 | 0.330543154  | H                        | 3.084033274  | 0.197220458  | -4.007941433 |
| N                        | 1.119563427  | 1.333621551  | 0.427850466  | H                        | 4.367351969  | 2.944719862  | -2.503098133 |
| C                        | -0.037940508 | -0.689890055 | -0.088952746 | H                        | 2.826414078  | 0.236024572  | 1.968637444  |
| C                        | -0.062495919 | 0.782485463  | 0.055007888  | H                        | 2.976957859  | -0.691239901 | 2.138718345  |
| C                        | -1.094499832 | -1.435722777 | -0.532144535 | H                        | 2.746626166  | -2.472996852 | 2.106444633  |
| C                        | -1.199034012 | 1.555388842  | -0.098453252 | H                        | 2.448246926  | -1.860818572 | 3.561474343  |
| C                        | -0.956075871 | -2.876448932 | -0.568404944 | H                        | -1.844096838 | 4.633551770  | 0.205104832  |
| C                        | -1.032379966 | 2.926506886  | 0.156116689  | H                        | -2.019061265 | -0.980715130 | -0.865441958 |
| N                        | 0.179364496  | -3.430615951 | -0.039375046 | H                        | -2.157766309 | 1.145684726  | -0.382605908 |
| N                        | 0.088902539  | 3.482077012  | 0.576114582  | <b>2b_TS<sub>r</sub></b> |              |              |              |
| C                        | 1.176862850  | -2.649970342 | 0.412334350  | C                        | -2.703224879 | 2.481513797  | 0.157593426  |
| C                        | 1.188611538  | 2.680347054  | 0.770019148  | C                        | -3.758416961 | -0.288291056 | -0.387456812 |
| C                        | 4.902552236  | -0.618423151 | -0.262120153 | C                        | -1.905170685 | 1.395088307  | -0.124762927 |
| C                        | 4.870088672  | 0.840855919  | -0.218433562 | C                        | -2.416373474 | 0.025268004  | -0.345930540 |
| C                        | 4.021139414  | -1.045672506 | -1.305221653 | N                        | -0.553180940 | 1.526708946  | -0.278196136 |
| C                        | 3.393650911  | 0.125094491  | -1.884390608 | N                        | -1.456711757 | -0.902983278 | -0.581870795 |

|    |              |              |              |                          |              |              |              |
|----|--------------|--------------|--------------|--------------------------|--------------|--------------|--------------|
| C  | -0.035097723 | 2.771535480  | -0.252201474 | H                        | 1.730977163  | 2.286113200  | -1.065597364 |
| C  | -1.813152144 | -2.182115838 | -0.998170054 | H                        | 1.425225736  | -0.230149730 | -1.846021307 |
| N  | -0.742371925 | 3.870488421  | 0.041185828  | H                        | 4.099434453  | 1.069064537  | -3.459947587 |
| N  | -3.140608751 | -2.545008026 | -0.981070678 | H                        | -3.772670153 | 2.408177776  | 0.296793359  |
| C  | -2.041874445 | 3.716552435  | 0.267467437  | H                        | -4.544899602 | 0.432578521  | -0.216363578 |
| C  | -4.046338442 | -1.637422712 | -0.679328492 | H                        | -5.390412881 | -2.950231737 | -0.890530229 |
| O  | -5.344838570 | -2.006982488 | -0.655780713 | H                        | -2.177963704 | 5.570080697  | 0.603433927  |
| O  | -2.766055122 | 4.794275072  | 0.590990377  | <b>3f_TS<sub>b</sub></b> |              |              |              |
| O  | 1.238337369  | 2.981249648  | -0.512026089 | C                        | -2.600811079 | 2.714920087  | -0.054557181 |
| O  | -0.937037014 | -2.986915901 | -1.382510357 | C                        | -3.821668949 | 0.049526724  | -0.813620115 |
| Ir | 0.528179424  | -0.347171109 | -0.060959093 | C                        | -1.883229964 | 1.574716164  | -0.272088734 |
| C  | 1.905384033  | -1.928813858 | 0.730550534  | C                        | -2.473922092 | 0.257902376  | -0.595471480 |
| C  | 2.605233062  | -0.653929525 | 0.872109911  | N                        | -0.505181782 | 1.579793834  | -0.264199547 |
| C  | 1.842726873  | 0.175444343  | 1.744126862  | N                        | -1.572584274 | -0.747322513 | -0.727457331 |
| C  | 0.652197481  | -0.557533690 | 2.149017320  | C                        | 0.088934617  | 2.785769463  | -0.130904790 |
| C  | 0.739375227  | -1.877958207 | 1.570240692  | C                        | -1.973599203 | -1.989702340 | -1.208909746 |
| C  | -0.357566961 | -0.102848719 | 3.158652232  | N                        | -0.517740046 | 3.936078619  | 0.092569001  |
| C  | 2.228769178  | 1.529466747  | 2.247415846  | N                        | -3.315034481 | -2.245184338 | -1.367504299 |
| C  | 3.962816986  | -0.348022783 | 0.321960051  | C                        | -1.894807701 | 3.953617720  | 0.196754071  |
| C  | 2.431030481  | -3.129539019 | 0.006644295  | C                        | -4.175471605 | -1.266176260 | -1.163337954 |
| C  | -0.196804498 | -3.005934734 | 1.865350946  | O                        | -5.493757708 | -1.532857575 | -1.310625244 |
| C  | 3.228082752  | 0.944215818  | -2.784736732 | O                        | -2.499643951 | 5.020847220  | 0.468890089  |
| O  | 2.670631761  | -0.193169957 | -2.809247147 | O                        | 1.425043429  | 2.854427734  | -0.234775761 |
| O  | 2.909890432  | 1.944981782  | -2.089670320 | O                        | -1.119999078 | -2.860457505 | -1.494293225 |
| H  | 1.358012113  | 2.173209578  | 2.391924221  | Ir                       | 0.356119572  | -0.367963705 | 0.081083470  |
| H  | -1.333936390 | -0.559513342 | 2.978379324  | C                        | 1.486155980  | -2.060580016 | 1.038007642  |
| H  | -0.479165619 | 0.982805299  | 3.142714093  | C                        | 2.237425043  | -0.836409827 | 1.314160570  |
| H  | -0.038833886 | -0.385820844 | 4.169590967  | C                        | 1.405673450  | 0.031999621  | 2.078782435  |
| H  | 2.928514287  | 2.029015306  | 1.576292164  | C                        | 0.120301946  | -0.619629082 | 2.272633681  |
| H  | 2.719350426  | 1.416213751  | 3.222439825  | C                        | 0.210931306  | -1.938744463 | 1.683969397  |
| H  | 4.107615175  | 0.722535805  | 0.166589772  | C                        | -0.998784296 | -0.113070318 | 3.131331601  |
| H  | 4.138537654  | -0.860915299 | -0.624731597 | C                        | 1.799902123  | 1.348236885  | 2.669877996  |
| H  | 4.724623203  | -0.690830323 | 1.033444173  | C                        | 3.682671942  | -0.615703419 | 0.990862263  |
| H  | 2.979472191  | -2.840690643 | -0.893183735 | C                        | 2.038196739  | -3.284383560 | 0.373310119  |
| H  | 1.623776867  | -3.802979205 | -0.287601794 | C                        | -0.834668056 | -3.000913273 | 1.807769408  |
| H  | 3.119364570  | -3.688600936 | 0.652695061  | C                        | 3.545057198  | 0.496185809  | -2.237714973 |
| H  | -1.226969181 | -2.660224697 | 1.976947232  | O                        | 2.872346900  | -0.574550716 | -2.321260851 |
| H  | 0.101081470  | -3.462617216 | 2.817496297  | O                        | 3.243152935  | 1.564844097  | -1.656851234 |
| H  | -0.166436485 | -3.777675866 | 1.096499973  | O                        | 4.762986141  | 0.432930735  | -2.883644353 |
| H  | 0.558594463  | -0.319365648 | -1.793051784 | H                        | 0.966416545  | 2.054503979  | 2.682258997  |

|             |              |              |              |             |              |              |              |
|-------------|--------------|--------------|--------------|-------------|--------------|--------------|--------------|
| H           | -1.963536463 | -0.507804761 | 2.803063650  | C           | 4.900945395  | -0.920166279 | 0.342354073  |
| H           | -1.053477269 | 0.978128100  | 3.115599979  | C           | 4.288886201  | -1.197526075 | -0.914279180 |
| H           | -0.849923441 | -0.422122051 | 4.173575654  | C           | 3.894940399  | 0.070893796  | -1.513500265 |
| H           | 2.635448418  | 1.800959610  | 2.134410325  | C           | 4.417869766  | 1.135952563  | -0.665820148 |
| H           | 2.112009474  | 1.190134816  | 3.709948206  | C           | 3.342031219  | 0.244887668  | -2.894646731 |
| H           | 3.913336211  | 0.442972341  | 0.858656809  | C           | 4.121673815  | -2.527384616 | -1.576436259 |
| H           | 3.980086111  | -1.148904424 | 0.086653809  | C           | 5.493018289  | -1.917961380 | 1.288166501  |
| H           | 4.299881753  | -0.992405576 | 1.816312664  | C           | 5.682155938  | 1.243414177  | 1.615783993  |
| H           | 2.733382496  | -3.021061714 | -0.427554819 | C           | 4.406747233  | 2.586949478  | -1.025426083 |
| H           | 1.242731131  | -3.897415328 | -0.055182099 | H           | 3.132934753  | -2.633868999 | -2.029376639 |
| H           | 2.583750000  | -3.898598838 | 1.100613520  | H           | 2.769430573  | 1.171280303  | -2.981504442 |
| H           | -1.843249176 | -2.584057716 | 1.759867534  | H           | 2.691156584  | -0.588230412 | -3.169928316 |
| H           | -0.725545922 | -3.484192699 | 2.786773630  | H           | 4.159542388  | 0.286299689  | -3.625042344 |
| H           | -0.735729420 | -3.767468227 | 1.039341887  | H           | 4.280612508  | -3.354543778 | -0.885094015 |
| H           | 0.655488872  | -0.311261024 | -1.628195363 | H           | 4.860721032  | -2.605591230 | -2.383671986 |
| H           | 1.839810446  | 2.072362036  | -0.680568052 | H           | 5.002389700  | -2.889464840 | 1.205649502  |
| H           | 1.523877569  | -0.376675250 | -1.570100185 | H           | 5.416947243  | -1.578964884 | 2.323696282  |
| H           | -3.683623772 | 2.718202641  | -0.056375324 | H           | 6.557582657  | -2.056373207 | 1.062119766  |
| H           | -4.563142453 | 0.830739515  | -0.725953193 | H           | 5.540436464  | 0.723896975  | 2.566118140  |
| H           | -5.579538252 | -2.467045368 | -1.568113596 | H           | 5.325384699  | 2.269321467  | 1.725662363  |
| H           | 5.193370219  | 1.293810285  | -2.756956612 | H           | 6.760338253  | 1.280419223  | 1.416059295  |
| <b>3a_d</b> |              |              |              | H           | 3.472940962  | 2.874046744  | -1.514877284 |
| C           | -1.126497456 | -1.340310131 | -0.865458273 | H           | 5.222112923  | 2.776807586  | -1.734807436 |
| C           | -1.040758013 | 1.661076094  | -0.551788696 | H           | 4.556543864  | 3.227436812  | -0.156583921 |
| C           | -0.018436230 | -0.642202952 | -0.431906911 | H           | 2.401613928  | 0.156606744  | 2.183248531  |
| C           | 0.025955780  | 0.828182325  | -0.283494951 | H           | 2.342659292  | -0.640333513 | 2.084511998  |
| N           | 1.105113059  | -1.279897100 | -0.013890723 | H           | -1.552363590 | 4.766560579  | -0.255647074 |
| N           | 1.186314952  | 1.303161340  | 0.236501795  | H           | -1.816613528 | -4.407372054 | -1.202530046 |
| C           | 1.103411088  | -2.664698539 | 0.135627252  | H           | -2.035593458 | -0.862665092 | -1.201360010 |
| C           | 1.271736386  | 2.630821532  | 0.647275775  | H           | -1.979840110 | 1.312304169  | -0.956767182 |
| N           | 0.040470695  | -3.389371531 | -0.351278539 | <b>4d_d</b> |              |              |              |
| N           | 0.253291182  | 3.498522590  | 0.327993562  | C           | -1.114288856 | -1.298130406 | -0.851943018 |
| C           | -1.003307267 | -2.742913863 | -0.829884010 | C           | -0.983936960 | 1.710183634  | -0.534561159 |
| C           | -0.832953406 | 3.019407475  | -0.243652901 | C           | -0.003323927 | -0.603061227 | -0.411809049 |
| O           | -1.832069248 | 3.879738430  | -0.541894198 | C           | 0.057421801  | 0.865944094  | -0.264540904 |
| O           | -2.041321968 | -3.466218450 | -1.305196639 | N           | 1.110213521  | -1.255724622 | 0.011618074  |
| O           | 2.052184782  | -3.238219540 | 0.713112437  | N           | 1.226957635  | 1.322030934  | 0.278924941  |
| O           | 2.256748555  | 3.022996549  | 1.310357385  | C           | 1.098046646  | -2.640656816 | 0.158065230  |
| Ir          | 2.806840720  | -0.069974138 | 0.361572666  | C           | 1.296625686  | 2.647402812  | 0.707534891  |
| C           | 4.988089189  | 0.536402288  | 0.493935899  | N           | 0.030759671  | -3.357159013 | -0.326982995 |

|    |              |              |              |                |              |              |              |
|----|--------------|--------------|--------------|----------------|--------------|--------------|--------------|
| N  | 0.311575636  | 3.529670435  | 0.402816984  | <b>3aNa_2w</b> |              |              |              |
| C  | -1.005022679 | -2.698085554 | -0.811361286 | C              | 2.564373004  | 2.457813838  | 0.022763909  |
| C  | -0.823887297 | 3.119769290  | -0.236173902 | C              | -0.121237114 | 3.780633865  | 0.150713259  |
| O  | -1.734381428 | 3.950895073  | -0.537786779 | C              | 1.375751973  | 1.783031712  | -0.137741576 |
| O  | -2.049051742 | -3.417683908 | -1.286959395 | C              | 0.049250339  | 2.432262796  | -0.055089966 |
| O  | 2.044908249  | -3.222900675 | 0.734593690  | N              | 1.336116843  | 0.447913795  | -0.424019378 |
| O  | 2.295647340  | 3.004900119  | 1.401752566  | N              | -1.008858731 | 1.594007391  | -0.246023707 |
| Ir | 2.823754000  | -0.063442535 | 0.385774614  | C              | 2.524390660  | -0.219525610 | -0.665597545 |
| C  | 5.018205727  | 0.511571693  | 0.495321192  | C              | -2.292116390 | 2.131756381  | -0.377225382 |
| C  | 4.915564296  | -0.941442116 | 0.327796686  | N              | 3.728443905  | 0.407166820  | -0.448793991 |
| C  | 4.280044759  | -1.196157633 | -0.920210090 | N              | -2.501923471 | 3.462663296  | -0.090451295 |
| C  | 3.888307732  | 0.084491891  | -1.498669254 | C              | 3.735097978  | 1.683493894  | -0.112208974 |
| C  | 4.436368037  | 1.133263989  | -0.647253042 | C              | -1.462183844 | 4.226718630  | 0.159802400  |
| C  | 3.316979286  | 0.279018575  | -2.870038678 | O              | -1.665680034 | 5.531053415  | 0.434699273  |
| C  | 4.085065107  | -2.516460794 | -1.595215465 | O              | 4.911786385  | 2.288821597  | 0.109288812  |
| C  | 5.513234861  | -1.957150911 | 1.251687483  | O              | 2.525654705  | -1.403757443 | -1.086493871 |
| C  | 5.737081018  | 1.197293771  | 1.615212953  | O              | -3.237051540 | 1.415115682  | -0.759670822 |
| C  | 4.444198603  | 2.588840640  | -0.990598759 | Ir             | -0.554287359 | -0.484168053 | -0.179060002 |
| H  | 3.088264526  | -2.604112350 | -2.034535496 | C              | -2.158396845 | -2.025398249 | -0.368811151 |
| H  | 2.748318152  | 1.209394065  | -2.938253049 | C              | -0.853396652 | -2.687700604 | -0.481770037 |
| H  | 2.656520447  | -0.546506943 | -3.145716685 | C              | -0.147115844 | -2.494239409 | 0.737893204  |
| H  | 4.122848541  | 0.323997058  | -3.613194224 | C              | -0.965060195 | -1.641368902 | 1.589406652  |
| H  | 4.240115370  | -3.353639044 | -0.914918897 | C              | -2.242426548 | -1.424399923 | 0.920513721  |
| H  | 4.810892440  | -2.598961267 | -2.413911954 | C              | -0.646628190 | -1.259283158 | 2.996797620  |
| H  | 5.007251784  | -2.920975563 | 1.169407043  | C              | 1.147887822  | -3.111138466 | 1.159508454  |
| H  | 5.460682663  | -1.629059985 | 2.292310593  | C              | -0.414236392 | -3.493705856 | -1.660836159 |
| H  | 6.571660353  | -2.109120205 | 1.006019596  | C              | -3.228402756 | -2.087865964 | -1.409578639 |
| H  | 5.602867919  | 0.668577960  | 2.561664237  | C              | -3.432847014 | -0.773894406 | 1.549461276  |
| H  | 5.393385796  | 2.225658183  | 1.742586666  | Na             | 4.806328611  | -1.772484796 | -0.764186374 |
| H  | 6.812979088  | 1.225164587  | 1.401722879  | O              | 6.086718687  | -2.096445670 | -2.595401160 |
| H  | 3.520827855  | 2.889843027  | -1.491344730 | O              | 5.509642437  | -2.666558284 | 1.193070177  |
| H  | 5.272728132  | 2.782046989  | -1.683659140 | H              | 1.786678297  | -2.393430132 | 1.680193819  |
| H  | 4.582472796  | 3.217947367  | -0.111352458 | H              | -1.138593474 | -0.325455355 | 3.277683174  |
| H  | 2.422611095  | 0.161216843  | 2.202301062  | H              | 0.429616203  | -1.150641511 | 3.147812708  |
| H  | 2.374227156  | -0.638078076 | 2.104061665  | H              | -1.004532302 | -2.044162093 | 3.675813390  |
| H  | -1.829318829 | -4.358920009 | -1.176463221 | H              | 1.698695371  | -3.522885962 | 0.314216528  |
| H  | -2.016701458 | -0.811607602 | -1.193380222 | H              | 0.932672711  | -3.929235773 | 1.858137243  |
| H  | -1.919007192 | 1.355737885  | -0.950233529 | H              | 0.667418485  | -3.636978640 | -1.671626856 |
|    |              |              |              | H              | -0.713174685 | -3.018488850 | -2.598831523 |
|    |              |              |              | H              | -0.888270342 | -4.482682265 | -1.627408260 |

|                           |              |              |              |                             |              |              |              |
|---------------------------|--------------|--------------|--------------|-----------------------------|--------------|--------------|--------------|
| H                         | -2.809206829 | -1.999018548 | -2.415286078 | C                           | -2.460875910 | -3.060143081 | -1.694280347 |
| H                         | -3.973913071 | -1.303438375 | -1.272348289 | C                           | -3.414529748 | -2.068176907 | 1.249497850  |
| H                         | -3.739410781 | -3.057109272 | -1.350054847 | Na                          | 4.776860677  | 0.197938161  | -0.232696357 |
| H                         | -3.144282388 | 0.078532495  | 2.169216636  | O                           | 6.241633297  | 0.265314907  | -1.969751128 |
| H                         | -3.929949612 | -1.503092332 | 2.201014051  | O                           | 5.660651985  | -0.400618497 | 1.773916739  |
| H                         | -4.151627228 | -0.432152009 | 0.805693811  | H                           | 2.005832226  | -1.692760386 | 1.913089231  |
| H                         | -2.622852571 | 5.701653729  | 0.392892660  | H                           | -1.627511878 | -0.911169667 | 3.215543247  |
| H                         | 5.623033479  | 1.638474457  | -0.028838058 | H                           | 0.138950336  | -1.097117718 | 3.244662793  |
| H                         | 2.626953449  | 3.510334286  | 0.257632261  | H                           | -0.906627148 | -2.478997359 | 3.606384420  |
| H                         | 0.694364099  | 4.471223170  | 0.308113093  | H                           | 2.455907181  | -2.733099360 | 0.549375734  |
| H                         | 6.084158476  | -3.002923950 | -2.935641661 | H                           | 1.732399326  | -3.435431499 | 2.005112757  |
| H                         | 7.024954694  | -1.892542013 | -2.469424050 | H                           | 1.736369725  | -3.049997848 | -1.559375085 |
| H                         | 5.422720299  | -3.629443895 | 1.248750032  | H                           | 0.315087251  | -2.966962436 | -2.617858394 |
| H                         | 6.438852219  | -2.499161374 | 1.408634148  | H                           | 0.623530111  | -4.423439588 | -1.667798102 |
| <b>4c<sub>Na_2w</sub></b> |              |              |              | H                           | -2.007349715 | -2.785981700 | -2.650364833 |
| C                         | 1.088352219  | 3.210571592  | 0.257500701  | H                           | -3.449750060 | -2.603617188 | -1.636198488 |
| C                         | -1.900058909 | 3.458617834  | 0.107767383  | H                           | -2.589117453 | -4.150051757 | -1.690896572 |
| C                         | 0.255818034  | 2.158734962  | 0.016863277  | H                           | -3.524786761 | -1.185538834 | 1.884631241  |
| C                         | -1.216311879 | 2.271991403  | -0.042869726 | H                           | -3.656765028 | -2.946295952 | 1.860738724  |
| N                         | 0.735313662  | 0.888785014  | -0.235121759 | H                           | -4.141095664 | -2.002013092 | 0.440645344  |
| N                         | -1.867614337 | 1.102731540  | -0.306313891 | H                           | -4.946102313 | 4.301359634  | 0.048124210  |
| C                         | 2.113052832  | 0.732415989  | -0.356746862 | H                           | 0.717679336  | 4.206820454  | 0.460248651  |
| C                         | -3.240500488 | 1.126467705  | -0.573589873 | H                           | -1.416113213 | 4.400806016  | 0.320422868  |
| N                         | 2.973424565  | 1.742094648  | -0.075604028 | H                           | 6.773089409  | -0.535595245 | -2.085790416 |
| N                         | -3.955389537 | 2.279989860  | -0.350565248 | H                           | 6.895673579  | 0.977138433  | -1.910039055 |
| C                         | 2.523691935  | 2.987240086  | 0.261621723  | H                           | 6.250615547  | -1.168249283 | 1.755695825  |
| C                         | -3.299955175 | 3.373967188  | -0.023176129 | H                           | 6.195593945  | 0.301019200  | 2.173132212  |
| O                         | -4.005628643 | 4.506532458  | 0.189682544  | <b>3a_f<sub>Na_2w</sub></b> |              |              |              |
| O                         | 3.328721115  | 3.914536316  | 0.547241827  | C                           | -2.861426328 | 2.399892759  | 0.407721074  |
| O                         | 2.576189918  | -0.382237930 | -0.751800097 | C                           | -3.832404442 | -0.362136027 | -0.173965271 |
| O                         | -3.810890322 | 0.111686870  | -1.022337822 | C                           | -2.009764736 | 1.340838171  | 0.163781299  |
| Ir                        | -0.677423132 | -0.652519845 | -0.149018596 | C                           | -2.492793787 | -0.029366611 | -0.116555830 |
| C                         | -1.593714243 | -2.657002612 | -0.545726773 | N                           | -0.662395728 | 1.498134817  | 0.095535371  |
| C                         | -0.131961401 | -2.793889668 | -0.523615202 | N                           | -1.519052580 | -0.932746452 | -0.380323063 |
| C                         | 0.333506902  | -2.428824209 | 0.771324723  | C                           | -0.130664538 | 2.776022198  | 0.183842883  |
| C                         | -0.820093342 | -1.984156766 | 1.539018370  | C                           | -1.864405921 | -2.191899802 | -0.868040085 |
| C                         | -2.015309363 | -2.206446211 | 0.738021720  | N                           | -0.941019213 | 3.848898688  | 0.451398640  |
| C                         | -0.801268521 | -1.584950712 | 2.978009334  | N                           | -3.184968352 | -2.580270777 | -0.858578702 |
| C                         | 1.713807105  | -2.570381089 | 1.330624023  | C                           | -2.240620547 | 3.649966596  | 0.562641137  |
| C                         | 0.685524287  | -3.327874966 | -1.654873599 | C                           | -4.102704481 | -1.698013151 | -0.519315407 |

|    |              |              |              |                  |              |              |              |
|----|--------------|--------------|--------------|------------------|--------------|--------------|--------------|
| O  | -5.398156908 | -2.088724602 | -0.513614101 | H                | -2.464104631 | 5.497767335  | 0.893432294  |
| O  | -3.032210415 | 4.710463694  | 0.830661610  | H                | 2.060200263  | 5.739910686  | -2.778502524 |
| O  | 1.104407385  | 2.958346476  | 0.020427864  | H                | 2.430551935  | 4.856030984  | -3.967990226 |
| O  | -0.986415329 | -2.962909871 | -1.313786299 | H                | 4.454649764  | 3.414321274  | 0.179152331  |
| Ir | 0.489399151  | -0.334064954 | 0.000302682  | H                | 5.139514966  | 2.762323726  | -1.018917238 |
| C  | 0.997507228  | -2.026264454 | 1.338659692  | <b>4c_fNa_2w</b> |              |              |              |
| C  | 1.992196314  | -1.952150903 | 0.306257332  | C                | -2.839418735 | 2.399030766  | 0.445331606  |
| C  | 2.700665900  | -0.683212196 | 0.466377843  | C                | -3.826102256 | -0.357600703 | -0.181413449 |
| C  | 2.118728128  | 0.019025072  | 1.557337393  | C                | -2.002290212 | 1.349243650  | 0.181071598  |
| C  | 1.007895015  | -0.773851342 | 2.069426178  | C                | -2.486029926 | -0.016351861 | -0.117706576 |
| C  | 2.619138595  | 1.278072460  | 2.190735063  | N                | -0.643711191 | 1.501798696  | 0.098372277  |
| C  | 3.931081215  | -0.302679949 | -0.295846638 | N                | -1.513712925 | -0.919961318 | -0.390304824 |
| C  | 2.402331963  | -3.038198952 | -0.640245225 | C                | -0.131348062 | 2.789744763  | 0.198283750  |
| C  | 0.142233376  | -3.205594195 | 1.681032988  | C                | -1.855200400 | -2.176567084 | -0.887316702 |
| C  | 0.217904346  | -0.474401882 | 3.307205355  | N                | -0.916840153 | 3.856781425  | 0.472609077  |
| O  | 2.187835421  | 1.167909694  | -2.695942281 | N                | -3.173661464 | -2.566337902 | -0.892208096 |
| C  | 1.156140602  | 0.526390180  | -2.985713950 | C                | -2.266508277 | 3.712747822  | 0.632627092  |
| O  | 0.359924380  | -0.091656846 | -2.200296190 | C                | -4.092603249 | -1.685993700 | -0.543798674 |
| Na | 2.448373500  | 3.180345859  | -1.725725208 | O                | -5.389176510 | -2.082307584 | -0.550487334 |
| O  | 1.898355171  | 4.864266836  | -3.159029736 | O                | -2.994324310 | 4.709501931  | 0.922671366  |
| O  | 4.523655270  | 3.472425734  | -0.785536972 | O                | 1.121281924  | 2.958171155  | 0.023285879  |
| H  | 4.128412207  | 0.770009120  | -0.252204002 | O                | -0.971810584 | -2.945946504 | -1.330959817 |
| H  | 1.799837405  | 1.923325652  | 2.514857912  | Ir               | 0.490027642  | -0.324278842 | 0.003729840  |
| H  | 3.266146295  | 1.848667837  | 1.522374986  | C                | 0.991599073  | -2.026008771 | 1.336840794  |
| H  | 3.203385246  | 1.012275082  | 3.081119885  | C                | 1.995653967  | -1.956364824 | 0.316538152  |
| H  | 3.862527086  | -0.600108954 | -1.344219781 | C                | 2.701247461  | -0.686461406 | 0.479313848  |
| H  | 4.796152532  | -0.820982206 | 0.137897178  | C                | 2.116892418  | 0.016253444  | 1.568547400  |
| H  | 2.693608801  | -2.627405038 | -1.610726347 | C                | 0.998319515  | -0.772389130 | 2.069423469  |
| H  | 1.599943418  | -3.759187221 | -0.802470509 | C                | 2.625959322  | 1.266897782  | 2.212530424  |
| H  | 3.268269586  | -3.579813527 | -0.238959053 | C                | 3.935711926  | -0.305420649 | -0.277159902 |
| H  | 0.068978788  | -3.911798142 | 0.854993957  | C                | 2.411609875  | -3.044013433 | -0.626144886 |
| H  | -0.867139447 | -2.906168026 | 1.973497882  | C                | 0.130019419  | -3.202699560 | 1.674568435  |
| H  | 0.591520665  | -3.724485682 | 2.537056898  | C                | 0.203974050  | -0.475583240 | 3.305505554  |
| H  | 0.076879488  | 0.600951261  | 3.440834867  | O                | 2.225691067  | 1.147815854  | -2.716720977 |
| H  | 0.740150964  | -0.854034363 | 4.194461138  | C                | 1.183038208  | 0.518378988  | -2.998246232 |
| H  | -0.766984630 | -0.946637941 | 3.272110220  | O                | 0.378733832  | -0.079270765 | -2.206935324 |
| H  | 0.861469702  | 0.456379394  | -4.050731092 | Na               | 2.403467445  | 3.176402183  | -1.739954191 |
| H  | -5.425452123 | -3.022206657 | -0.785774583 | O                | 1.850466288  | 4.830666028  | -3.212672562 |
| H  | -3.935174997 | 2.297315925  | 0.466698107  | O                | 4.496356659  | 3.484766073  | -0.818552151 |
| H  | -4.630256770 | 0.337415786  | 0.028697940  | H                | 4.127708227  | 0.768539987  | -0.238939161 |

|                    |              |              |              |    |              |              |              |
|--------------------|--------------|--------------|--------------|----|--------------|--------------|--------------|
| H                  | 1.811672708  | 1.915329777  | 2.542806273  | C  | 2.148368639  | -1.973196917 | -0.203233207 |
| H                  | 3.275014687  | 1.839736822  | 1.547861087  | C  | 0.902324516  | -2.740107489 | -0.173654711 |
| H                  | 3.210194056  | 0.990822162  | 3.099922237  | C  | 0.112789341  | -2.340894154 | -1.293536531 |
| H                  | 3.874309307  | -0.607898699 | -1.324606719 | C  | 0.822725479  | -1.286589067 | -2.002513291 |
| H                  | 4.801096929  | -0.817237014 | 0.163735094  | C  | 2.108647015  | -1.122408320 | -1.355944497 |
| H                  | 2.712446661  | -2.634944699 | -1.594568927 | C  | 0.414383059  | -0.697621490 | -3.318951693 |
| H                  | 1.607819715  | -3.761917690 | -0.796085756 | C  | -1.168027711 | -2.955289241 | -1.764168457 |
| H                  | 3.271962781  | -3.590175697 | -0.218683883 | C  | 0.577524489  | -3.812896183 | 0.819061589  |
| H                  | 0.057543763  | -3.908392031 | 0.847869091  | C  | 3.319703558  | -2.188639612 | 0.704976680  |
| H                  | -0.880010005 | -2.899239601 | 1.960853986  | C  | 3.220757651  | -0.271134902 | -1.882596248 |
| H                  | 0.570992275  | -3.724479491 | 2.533220449  | C  | 1.093768462  | -0.418160207 | 3.041176367  |
| H                  | 0.071689073  | 0.600051808  | 3.446187291  | O  | 0.956734977  | -0.529129150 | 4.268712566  |
| H                  | 0.716289198  | -0.866239365 | 4.193916123  | O  | 0.111901071  | -0.441176240 | 2.198185055  |
| H                  | -0.785445583 | -0.937655272 | 3.260878391  | Na | -4.935292348 | -1.966279838 | 0.681065203  |
| H                  | 0.887440116  | 0.443003898  | -4.063169414 | O  | -6.053799909 | -2.072319728 | 2.652379536  |
| H                  | -5.408163857 | -3.012345243 | -0.834167169 | O  | -5.934404189 | -3.186462759 | -0.948888165 |
| H                  | -3.913332158 | 2.277410847  | 0.507182088  | H  | -1.866216532 | -2.203436179 | -2.140046235 |
| H                  | -4.624886074 | 0.338562807  | 0.029462115  | H  | 0.868334091  | 0.283566652  | -3.478359422 |
| H                  | 1.990572920  | 5.713787864  | -2.840730781 | H  | -0.670764704 | -0.586234589 | -3.385056510 |
| H                  | 2.398700391  | 4.820051224  | -4.010731614 | H  | 0.732128328  | -1.349536602 | -4.142672818 |
| H                  | 4.417871211  | 3.416607429  | 0.144836861  | H  | -1.662133511 | -3.529158572 | -0.980545222 |
| H                  | 5.107152242  | 2.770927710  | -1.053630619 | H  | -0.941368259 | -3.636532978 | -2.594237288 |
| <b>3a_f-Na1_2w</b> |              |              |              | H  | -0.498021715 | -3.991977327 | 0.878746987  |
| C                  | -2.828214502 | 2.252261472  | -0.392890814 | H  | 0.936990795  | -3.552014230 | 1.818281615  |
| C                  | -0.215778197 | 3.711009560  | -0.228195970 | H  | 1.061317015  | -4.754393439 | 0.530798695  |
| C                  | -1.615802884 | 1.621586445  | -0.189749119 | H  | 3.000930535  | -2.487956612 | 1.706381223  |
| C                  | -0.322767884 | 2.338681003  | -0.120636147 | H  | 3.928818697  | -1.287042518 | 0.794454478  |
| N                  | -1.529302025 | 0.286644790  | 0.040546375  | H  | 3.959198945  | -2.988134506 | 0.309661595  |
| N                  | 0.750331673  | 1.550282998  | 0.136711731  | H  | 2.847826987  | 0.660267722  | -2.315608431 |
| C                  | -2.686651240 | -0.434783779 | 0.241400862  | H  | 3.732845970  | -0.821865455 | -2.681870502 |
| C                  | 1.985077470  | 2.139744668  | 0.403735421  | H  | 3.953114833  | -0.027632091 | -1.113900027 |
| N                  | -3.910269339 | 0.143802671  | -0.002561888 | H  | 2.098145423  | -0.276202391 | 2.605084607  |
| N                  | 2.135810104  | 3.500191497  | 0.253808319  | H  | 2.173671089  | 5.769599739  | -0.022537093 |
| C                  | -3.962597351 | 1.426759836  | -0.319070604 | H  | -2.923276705 | 3.310149124  | -0.590353380 |
| C                  | 1.080567131  | 4.227082725  | -0.049744422 | H  | -1.055783380 | 4.361433648  | -0.424427326 |
| O                  | 1.237631849  | 5.563582401  | -0.189174786 | H  | -5.845049266 | 1.295176292  | -0.463304589 |
| O                  | -5.163886356 | 1.983008965  | -0.563783324 | H  | -5.523124703 | -2.433685282 | 3.377554384  |
| O                  | -2.650102969 | -1.625454057 | 0.656332693  | H  | -6.338023945 | -1.205494369 | 2.977562761  |
| O                  | 2.951814437  | 1.441834221  | 0.781241034  | H  | -6.846143722 | -2.912246656 | -1.126677752 |
| Ir                 | 0.437964171  | -0.558725826 | 0.031970353  | H  | -6.009496575 | -4.127239609 | -0.731232760 |



|                     |              |              |              |                    |              |              |              |
|---------------------|--------------|--------------|--------------|--------------------|--------------|--------------|--------------|
| <b>4c_fr-Na1_2w</b> |              |              | H            | -0.507218477       | -4.018418767 | 0.797053007  |              |
| C                   | -2.851215926 | 2.202222993  | -0.416014289 | H                  | 0.900136866  | -3.582819359 | 1.778802397  |
| C                   | -0.252812329 | 3.698255432  | -0.257580806 | H                  | 1.064896109  | -4.766629393 | 0.478629123  |
| C                   | -1.641396059 | 1.592465041  | -0.222033665 | H                  | 2.971784900  | -2.512007495 | 1.727324069  |
| C                   | -0.356636892 | 2.323438906  | -0.143610274 | H                  | 3.930878709  | -1.319011064 | 0.837768594  |
| N                   | -1.532819427 | 0.247084141  | 0.011708134  | H                  | 3.952681368  | -3.018913917 | 0.349705749  |
| N                   | 0.723939494  | 1.549414132  | 0.128515176  | H                  | 2.912374579  | 0.684104806  | -2.241820641 |
| C                   | -2.693523519 | -0.468123344 | 0.220665140  | H                  | 3.785692316  | -0.795282021 | -2.645141517 |
| C                   | 1.950766015  | 2.149568241  | 0.407688571  | H                  | 4.004090120  | -0.047330599 | -1.054709299 |
| N                   | -3.916784455 | 0.084387199  | 0.001752665  | H                  | 2.080458524  | -0.284822785 | 2.604928002  |
| N                   | 2.093833022  | 3.509118645  | 0.257855543  | H                  | 2.118511795  | 5.772220699  | -0.024884723 |
| C                   | -4.053471975 | 1.400731392  | -0.343004466 | H                  | -2.939343757 | 3.265406855  | -0.598412259 |
| C                   | 1.033735088  | 4.224216152  | -0.064547324 | H                  | -1.095851805 | 4.340118716  | -0.468759455 |
| O                   | 1.185890578  | 5.563738085  | -0.205903153 | H                  | -5.425531287 | -2.335264721 | 3.447041748  |
| O                   | -5.196337659 | 1.900157759  | -0.558403858 | H                  | -6.268151519 | -1.137709092 | 3.016603472  |
| O                   | -2.627932210 | -1.672563172 | 0.640513385  | H                  | -6.831012276 | -2.781057576 | -1.130174352 |
| O                   | 2.919942900  | 1.458310639  | 0.797291523  | H                  | -6.338233975 | -4.060968207 | -0.459290398 |
| Ir                  | 0.435238381  | -0.562306502 | 0.015181685  | <b>3a_fc-Na_2w</b> |              |              |              |
| C                   | 2.162542676  | -1.982468432 | -0.198111524 | C                  | 2.963457215  | 2.189197602  | -0.140494387 |
| C                   | 0.911559030  | -2.742803900 | -0.202370922 | C                  | 3.781651705  | -0.684110373 | 0.216034951  |
| C                   | 0.147078033  | -2.329548292 | -1.335207283 | C                  | 2.069763253  | 1.154813548  | 0.027121012  |
| C                   | 0.872703659  | -1.265447461 | -2.011878581 | C                  | 2.472267191  | -0.256928281 | 0.206926267  |
| C                   | 2.149293630  | -1.117246410 | -1.336600527 | N                  | 0.727709600  | 1.372701738  | 0.100121814  |
| C                   | 0.498676684  | -0.662094975 | -3.332491702 | N                  | 1.438548846  | -1.112533676 | 0.424936231  |
| C                   | -1.121424956 | -2.939798007 | -1.844849740 | C                  | 0.254176024  | 2.674335958  | 0.144079735  |
| C                   | 0.568211752  | -3.831680210 | 0.766843070  | C                  | 1.700482280  | -2.430793113 | 0.795091009  |
| C                   | 3.313251986  | -2.213431432 | 0.733125875  | N                  | 1.103906794  | 3.723465604  | -0.086260984 |
| C                   | 3.273492960  | -0.263114486 | -1.833380676 | N                  | 2.990303597  | -2.905755347 | 0.733909051  |
| C                   | 1.074460793  | -0.434936253 | 3.035158317  | C                  | 2.391532487  | 3.473250043  | -0.232029425 |
| O                   | 0.934611203  | -0.554647009 | 4.262533319  | C                  | 3.962476455  | -2.062652712 | 0.454500409  |
| O                   | 0.098081215  | -0.457554341 | 2.187975521  | O                  | 5.226759939  | -2.533186386 | 0.397130803  |
| Na                  | -4.924474346 | -1.937259915 | 0.722307766  | O                  | 3.225080191  | 4.504591219  | -0.469631741 |
| O                   | -6.004159137 | -2.025920367 | 2.734549363  | O                  | -0.959946483 | 2.888391547  | 0.400108653  |
| O                   | -6.025187044 | -3.216246205 | -0.814761497 | O                  | 0.771286527  | -3.167904818 | 1.188276071  |
| H                   | -1.807040356 | -2.184375525 | -2.236826358 | Ir                 | -0.489654943 | -0.374180055 | -0.078985691 |
| H                   | 0.953161190  | 0.322542626  | -3.468293253 | C                  | -2.200502770 | -1.794271818 | -0.395431351 |
| H                   | -0.584625050 | -0.552008014 | -3.426448793 | C                  | -2.716127331 | -0.426936280 | -0.521284365 |
| H                   | 0.840206275  | -1.301974999 | -4.156310725 | C                  | -2.037731831 | 0.212564761  | -1.592852811 |
| H                   | -1.640663567 | -3.512233052 | -1.076501067 | C                  | -1.045331610 | -0.723452418 | -2.114816965 |
| H                   | -0.875428206 | -3.620037033 | -2.670183114 | C                  | -1.215557368 | -1.990698362 | -1.406960626 |

|                    |              |              |              |    |              |              |              |
|--------------------|--------------|--------------|--------------|----|--------------|--------------|--------------|
| C                  | -0.215017814 | -0.513360799 | -3.339433388 | N  | -0.027151252 | 1.404014253  | -0.618353680 |
| C                  | -2.334451000 | 1.555848041  | -2.180026431 | N  | 1.812626846  | 0.095048433  | 0.657014802  |
| C                  | -3.840736889 | 0.131322800  | 0.291176039  | C  | -1.141000626 | 2.089375653  | -1.100505652 |
| C                  | -2.723754126 | -2.809911751 | 0.570500707  | C  | 2.600110560  | -0.636633089 | 1.547130014  |
| C                  | -0.521711217 | -3.263805343 | -1.771260175 | N  | -1.047619719 | 3.347240368  | -1.576925309 |
| C                  | -1.720638135 | 0.233094334  | 3.239732144  | N  | 3.827378858  | -0.146021658 | 1.924806993  |
| O                  | -2.509865381 | -0.643300550 | 3.662090507  | C  | 0.137669264  | 4.029978813  | -1.518224466 |
| O                  | -1.573497972 | 1.415656850  | 3.677598981  | C  | 4.165390741  | 1.068968888  | 1.540327099  |
| Na                 | -1.932243280 | 3.208741925  | 2.401004919  | O  | 5.371568727  | 1.548220870  | 1.920978673  |
| O                  | -4.154971939 | 3.470814406  | 1.854610966  | O  | 0.243425962  | 5.185304414  | -2.018021988 |
| O                  | -1.173241327 | 5.100464492  | 3.448581997  | O  | -2.270341408 | 1.493421109  | -1.056365268 |
| H                  | -1.424409872 | 2.067659510  | -2.501585708 | O  | 2.182703590  | -1.722468209 | 2.006286403  |
| H                  | 0.690444162  | -1.123986617 | -3.320343772 | Ir | 0.125789766  | -0.677282868 | -0.370360036 |
| H                  | 0.072339689  | 0.534340656  | -3.452516338 | C  | -0.439915846 | -2.855998506 | -0.249103743 |
| H                  | -0.794545470 | -0.799887014 | -4.226516934 | C  | -1.494072627 | -2.127656318 | -0.966161894 |
| H                  | -2.867227859 | 2.199039046  | -1.478732791 | C  | -0.926373372 | -1.553052113 | -2.136864135 |
| H                  | -2.967657213 | 1.419683596  | -3.065610771 | C  | 0.501671845  | -1.852734536 | -2.125395954 |
| H                  | -3.849665412 | 1.222966740  | 0.282215921  | C  | 0.768340524  | -2.725041740 | -0.987255752 |
| H                  | -3.793932305 | -0.210097680 | 1.327371992  | C  | 1.464073133  | -1.539285150 | -3.225036153 |
| H                  | -4.794100056 | -0.215824548 | -0.127777736 | C  | -1.634214413 | -0.843824750 | -3.247641139 |
| H                  | -2.849036976 | -2.380139407 | 1.568161529  | C  | -2.934801529 | -2.117483467 | -0.565676222 |
| H                  | -2.058134694 | -3.670875634 | 0.647325978  | C  | -0.661318413 | -3.690747802 | 0.971836572  |
| H                  | -3.705969599 | -3.168383749 | 0.238060419  | C  | 2.076364620  | -3.404279203 | -0.731819215 |
| H                  | 0.502707372  | -3.081168940 | -2.104156763 | C  | -1.557156796 | -0.661033155 | 3.037019560  |
| H                  | -1.060948470 | -3.731434957 | -2.604424882 | O  | -2.643533793 | -1.295446728 | 3.163322118  |
| H                  | -0.496748638 | -3.968888022 | -0.940934693 | O  | -1.393440799 | 0.465249122  | 2.484285965  |
| H                  | -1.066758050 | -0.049366324 | 2.373716775  | Na | -2.967016020 | 1.400778155  | 1.110665216  |
| H                  | 5.198702688  | -3.485747108 | 0.593860887  | O  | -4.635713088 | -0.015930487 | 1.867558900  |
| H                  | 2.695967655  | 5.320909767  | -0.497867083 | O  | -3.450902036 | 3.552603447  | 1.759506550  |
| H                  | 4.032526774  | 2.046217152  | -0.205604591 | H  | -1.047380689 | -0.002689749 | -3.625496161 |
| H                  | 4.623250086  | -0.028817426 | 0.043281977  | H  | 2.492977142  | -1.513328658 | -2.859074512 |
| H                  | -4.648929532 | 2.677461542  | 2.109588262  | H  | 1.234778738  | -0.580256514 | -3.695196191 |
| H                  | -4.244655862 | 3.497731290  | 0.890553725  | H  | 1.402612711  | -2.315343244 | -3.999016079 |
| H                  | -0.745123143 | 5.706278472  | 2.825958154  | H  | -2.610790103 | -0.470695150 | -2.938582927 |
| H                  | -0.475967554 | 4.889366627  | 4.086747858  | H  | -1.784698307 | -1.542867419 | -4.079532794 |
| <b>4c_fc-Na_2w</b> |              |              |              | H  | -3.487935351 | -1.319478513 | -1.064226515 |
| C                  | 1.258931774  | 3.407187883  | -0.836129066 | H  | -3.050425984 | -2.002176825 | 0.514403812  |
| C                  | 3.351844330  | 1.920311873  | 0.769391073  | H  | -3.396349613 | -3.073516416 | -0.844631094 |
| C                  | 1.131890907  | 2.115193077  | -0.417764523 | H  | -1.383134436 | -3.231096256 | 1.650901126  |
| C                  | 2.160599449  | 1.373135140  | 0.340701581  | H  | 0.268542507  | -3.859810736 | 1.517545103  |

|                                |              |              |              |    |              |              |              |
|--------------------------------|--------------|--------------|--------------|----|--------------|--------------|--------------|
| H                              | -1.062425673 | -4.669709673 | 0.679334017  | C  | -0.963094276 | -0.301097287 | 3.116219862  |
| H                              | 2.919619446  | -2.730385200 | -0.903452107 | O  | -0.170403484 | -1.137964356 | 3.405633108  |
| H                              | 2.181480440  | -4.248287837 | -1.424608266 | O  | -1.866297083 | 0.450405514  | 3.364551600  |
| H                              | 2.144301585  | -3.788359236 | 0.285707532  | O  | -2.856299661 | 3.983068293  | 3.333643102  |
| H                              | -0.650872184 | -1.144032217 | 3.459076895  | Na | -1.322537838 | 2.591687946  | 2.404411623  |
| H                              | 5.806911533  | 0.861808582  | 2.455442606  | O  | 0.730385336  | 2.526006724  | 3.468728025  |
| H                              | 2.169676490  | 3.974149401  | -0.689100618 | H  | -1.284370085 | 2.587178665  | -2.568571970 |
| H                              | 3.654435507  | 2.931711289  | 0.538066020  | H  | 0.142464653  | -0.877340466 | -3.642662520 |
| H                              | -3.951638815 | -0.531764702 | 2.378160396  | H  | -0.227612311 | 0.851990866  | -3.721324231 |
| H                              | -4.893891122 | -0.607240186 | 1.146218983  | H  | -1.341063388 | -0.323941143 | -4.425431087 |
| H                              | -3.309142249 | 4.171266924  | 1.028021236  | H  | -2.591915788 | 2.933168859  | -1.424290315 |
| H                              | -2.850268996 | 3.866436513  | 2.451266474  | H  | -2.956788876 | 2.229231853  | -3.004873221 |
| <b>3a_TS<sub>d-Na_2w</sub></b> |              |              |              | H  | -3.607895802 | 2.099940741  | 0.391858935  |
| C                              | 3.142480424  | 2.057101815  | -0.328011373 | H  | -3.826239932 | 0.638411071  | 1.375571634  |
| C                              | 3.590222185  | -0.889017910 | -0.007789112 | H  | -4.837080669 | 0.911874118  | -0.045565655 |
| C                              | 2.117198362  | 1.145987378  | -0.159078948 | H  | -3.413607599 | -1.657083368 | 1.456498319  |
| C                              | 2.335461384  | -0.309641732 | -0.016964634 | H  | -2.583090021 | -2.989313248 | 0.643208727  |
| N                              | 0.821852501  | 1.536985796  | -0.043477801 | H  | -4.164825421 | -2.447085362 | 0.065038447  |
| N                              | 1.206166366  | -1.035997351 | 0.174689504  | H  | -0.269061851 | -2.813621430 | -2.425946672 |
| C                              | 0.535849657  | 2.890314714  | 0.055720079  | H  | -1.963760141 | -3.182776718 | -2.754154799 |
| C                              | 1.308250319  | -2.387482997 | 0.505727864  | H  | -1.277433828 | -3.530998748 | -1.159563435 |
| N                              | 1.510812458  | 3.820275033  | -0.178765373 | H  | -0.634071851 | 0.052758427  | 1.551340320  |
| N                              | 2.538202984  | -3.003582982 | 0.470037388  | H  | 4.663625942  | -3.839043750 | 0.360555977  |
| C                              | 2.749895194  | 3.404378286  | -0.372527817 | H  | 3.288609514  | 5.204471094  | -0.604992686 |
| C                              | 3.607304294  | -2.276474987 | 0.215891345  | H  | 4.179935399  | 1.772567750  | -0.426998473 |
| O                              | 4.810872432  | -2.895191964 | 0.177571346  | H  | 4.504340109  | -0.333165799 | -0.158144309 |
| O                              | 3.708086424  | 4.326658511  | -0.608020113 | H  | -3.628697877 | 3.528651478  | 3.700885727  |
| O                              | -0.626628188 | 3.267599013  | 0.374838000  | H  | -3.231493086 | 4.617568926  | 2.705541886  |
| O                              | 0.290671988  | -3.038398865 | 0.830739917  | H  | 1.474476837  | 2.466099776  | 2.851973962  |
| Ir                             | -0.640904871 | -0.022306194 | -0.120373479 | H  | 0.878848838  | 1.797522928  | 4.088843806  |
| <b>4c_TS<sub>d-Na_2w</sub></b> |              |              |              | C  | 3.101592134  | 2.104964234  | -0.235651754 |
| C                              | -2.836114993 | 0.299277349  | -0.509206798 | C  | 3.574122678  | -0.844174965 | 0.010446285  |
| C                              | -2.130948486 | 0.833451669  | -1.635506277 | C  | 2.088105883  | 1.189429640  | -0.129301362 |
| C                              | -1.403971199 | -0.238413811 | -2.282272957 | C  | 2.315652040  | -0.266518237 | -0.002603572 |
| C                              | -1.694748118 | -1.450371057 | -1.555154014 | N  | 0.774728262  | 1.566052584  | -0.048023859 |
| C                              | -0.662939991 | -0.140793734 | -3.581211364 | N  | 1.192184858  | -1.007743115 | 0.168187683  |
| C                              | -2.238147845 | 2.226723523  | -2.175420336 | C  | 0.497488355  | 2.922351873  | 0.061687194  |
| C                              | -3.821598679 | 1.028410228  | 0.354782702  | C  | 1.301217710  | -2.360213988 | 0.493332683  |
| C                              | -3.207892750 | -2.108516483 | 0.482640907  | N  | 1.454251645  | 3.862733311  | -0.094430918 |
| C                              | -1.269384231 | -2.820263363 | -1.985514195 |    |              |              |              |

|    |              |              |              |                  |              |              |              |
|----|--------------|--------------|--------------|------------------|--------------|--------------|--------------|
| N  | 2.533294941  | -2.969811646 | 0.462183951  | H                | 4.659449455  | -3.790270178 | 0.360965343  |
| C  | 2.765389005  | 3.509771644  | -0.270455362 | H                | 4.141116138  | 1.808080443  | -0.291326464 |
| C  | 3.598799075  | -2.230306363 | 0.220155982  | H                | 4.484637971  | -0.279491419 | -0.128755271 |
| O  | 4.807321432  | -2.845393381 | 0.184885607  | H                | -3.312185884 | 3.387827826  | 4.097631494  |
| O  | 3.657277304  | 4.396362087  | -0.431345973 | H                | -3.298399157 | 4.405504376  | 2.957030916  |
| O  | -0.703196290 | 3.276316124  | 0.334300850  | H                | 1.533509172  | 2.604732921  | 2.703556821  |
| O  | 0.285243258  | -3.019595481 | 0.812157713  | H                | 1.083751284  | 1.676114600  | 3.828543042  |
| Ir | -0.659885375 | -0.011544295 | -0.142241634 | <b>3a_hNa_2w</b> |              |              |              |
| C  | -2.584505665 | -1.109577556 | -0.457886548 | C                | -3.216851102 | 1.539475622  | 0.453764780  |
| C  | -2.843519184 | 0.323627294  | -0.565100482 | C                | -3.377247921 | -1.374874947 | -0.204740977 |
| C  | -2.124217953 | 0.810726443  | -1.706120460 | C                | -2.124267844 | 0.790115645  | 0.059568591  |
| C  | -1.402418345 | -0.287961540 | -2.305255707 | C                | -2.195080082 | -0.658290335 | -0.227189738 |
| C  | -1.718136673 | -1.473500765 | -1.541340341 | N                | -0.906771894 | 1.349758349  | -0.160619296 |
| C  | -0.644078520 | -0.250934932 | -3.597738276 | N                | -1.018583348 | -1.221313173 | -0.595471458 |
| C  | -2.215204525 | 2.184126340  | -2.297889579 | C                | -0.802187484 | 2.733303818  | -0.155074413 |
| C  | -3.828088897 | 1.096011675  | 0.262749579  | C                | -1.006264716 | -2.533403629 | -1.064902846 |
| C  | -3.264111265 | -2.049183321 | 0.494639560  | N                | -1.836691905 | 3.504136295  | 0.300571804  |
| C  | -1.310742409 | -2.861049633 | -1.933847443 | N                | -2.153732419 | -3.289601277 | -1.004304073 |
| C  | -0.970977601 | -0.305393630 | 3.110044885  | C                | -2.978835940 | 2.914367306  | 0.604629475  |
| O  | -0.172290841 | -1.142193676 | 3.379640796  | C                | -3.268080082 | -2.721841140 | -0.587318090 |
| O  | -1.871376600 | 0.444777418  | 3.367702103  | O                | -4.391709123 | -3.475862415 | -0.533490142 |
| O  | -2.710667886 | 3.888629360  | 3.527172735  | O                | -3.991899580 | 3.678487813  | 1.069534552  |
| Na | -1.267361161 | 2.565602901  | 2.365811506  | O                | 0.250602475  | 3.287372225  | -0.578965205 |
| O  | 0.835935774  | 2.490193739  | 3.366270616  | O                | 0.041358992  | -3.022922083 | -1.547726835 |
| H  | -1.268447958 | 2.499466376  | -2.743696510 | Ir               | 0.731423396  | -0.043191502 | -0.290664496 |
| H  | 0.140757158  | -1.011592137 | -3.622819097 | C                | 2.606508135  | -1.184269439 | 0.080906086  |
| H  | -0.177662757 | 0.723908506  | -3.762259226 | C                | 2.937524811  | 0.230392208  | 0.080204358  |
| H  | -1.314522050 | -0.442520503 | -4.446383543 | C                | 2.249638056  | 0.839139570  | 1.180124385  |
| H  | -2.516270396 | 2.930781085  | -1.563345124 | C                | 1.532076463  | -0.192265878 | 1.911466362  |
| H  | -2.966636870 | 2.174957206  | -3.097888398 | C                | 1.763781475  | -1.427699051 | 1.238210240  |
| H  | -3.592088137 | 2.163290134  | 0.273299117  | C                | 0.790813179  | 0.012561641  | 3.199151090  |
| H  | -3.853444741 | 0.736776005  | 1.294883149  | C                | 2.411787578  | 2.252435794  | 1.652999815  |
| H  | -4.841342269 | 0.988142875  | -0.145991624 | C                | 3.954883993  | 0.885158988  | -0.807344330 |
| H  | -3.507474539 | -1.553201743 | 1.437676948  | C                | 3.282697544  | -2.235771708 | -0.750571009 |
| H  | -2.636959282 | -2.914159731 | 0.720562609  | C                | 1.263043230  | -2.770526197 | 1.675108227  |
| H  | -4.203782152 | -2.419369483 | 0.064567929  | Na               | 1.019315433  | 2.374547054  | -2.483425809 |
| H  | -0.272005382 | -2.900296633 | -2.272648101 | O                | 2.864781590  | 3.582519744  | -3.057267803 |
| H  | -1.939546488 | -3.193606315 | -2.769584384 | O                | -0.548608533 | 2.501547523  | -4.141189598 |
| H  | -1.431289459 | -3.571608527 | -1.116668485 | H                | 1.486809736  | 2.651563202  | 2.075823901  |
| H  | -0.656397861 | 0.074605645  | 1.525334197  | H                | 0.057013835  | -0.778808709 | 3.372051271  |

|                   |              |              |              |                  |              |              |              |
|-------------------|--------------|--------------|--------------|------------------|--------------|--------------|--------------|
| H                 | 0.263698844  | 0.970713647  | 3.212014705  | C                | -1.962022234 | -2.163912859 | -0.057157481 |
| H                 | 1.483541634  | 0.011180949  | 4.050949875  | C                | -0.692731392 | -2.836476738 | -0.264242965 |
| H                 | 2.743133736  | 2.918034646  | 0.854143580  | C                | 0.166812375  | -2.489929987 | 0.829437274  |
| H                 | 3.171038260  | 2.279190581  | 2.445359821  | C                | -0.581682889 | -1.664095149 | 1.765900014  |
| H                 | 3.772342302  | 1.956725759  | -0.915017916 | C                | -1.877098215 | -1.469108956 | 1.218725757  |
| H                 | 3.967874172  | 0.436604823  | -1.803852514 | C                | -0.078894870 | -1.197512755 | 3.100084361  |
| H                 | 4.958610379  | 0.763136460  | -0.379364109 | C                | 1.514780497  | -3.076528708 | 1.123615039  |
| H                 | 3.512759044  | -1.865903910 | -1.753138122 | C                | -0.405474973 | -3.844606560 | -1.338528271 |
| H                 | 2.662715490  | -3.128171134 | -0.854265872 | C                | -3.224153454 | -2.439000463 | -0.823582428 |
| H                 | 4.229217155  | -2.540001794 | -0.284639706 | C                | -3.005076171 | -0.719251182 | 1.861369816  |
| H                 | 0.339386825  | -2.688517230 | 2.253315810  | Na               | 5.170335362  | -1.048480219 | -0.946156765 |
| H                 | 2.012360397  | -3.254649110 | 2.313786998  | O                | 6.389217374  | -2.152992355 | 0.617096943  |
| H                 | 1.078302634  | -3.427263027 | 0.823384336  | O                | 6.231248567  | -0.970666286 | -2.950870078 |
| H                 | 0.725453078  | 0.154664322  | -1.897871244 | H                | 2.188145143  | -2.342967908 | 1.574384878  |
| H                 | -4.158801805 | -4.373129687 | -0.827766080 | H                | -0.619310306 | -0.313697527 | 3.448915463  |
| H                 | -3.677538168 | 4.598232899  | 1.108071788  | H                | 0.985719128  | -0.948784410 | 3.063477282  |
| H                 | -4.190769477 | 1.112526125  | 0.645528396  | H                | -0.201783996 | -1.979825039 | 3.861023530  |
| H                 | -4.327055966 | -0.943909250 | 0.077099103  | H                | 1.992402619  | -3.475119610 | 0.227378604  |
| H                 | 3.287793285  | 3.347872163  | -3.895978084 | H                | 1.400727413  | -3.901250697 | 1.839175619  |
| H                 | 2.688302521  | 4.531599397  | -3.134667390 | H                | 0.663164844  | -3.912008437 | -1.555704903 |
| H                 | -0.834363346 | 3.413734940  | -4.297746926 | H                | -0.926176370 | -3.601172624 | -2.267685685 |
| H                 | -0.231443934 | 2.200296328  | -5.005311186 | H                | -0.743167500 | -4.839978331 | -1.021538727 |
| <b>3a_hNa1_2w</b> |              |              |              | H                | -3.017658973 | -2.629442624 | -1.880125462 |
| C                 | 2.320574418  | 2.752307940  | 0.033555586  | H                | -3.927028412 | -1.605947407 | -0.764361447 |
| C                 | -0.510174232 | 3.699362734  | -0.101901864 | H                | -3.728800597 | -3.327778566 | -0.421358343 |
| C                 | 1.245634746  | 1.901528227  | -0.159953019 | H                | -2.643809875 | 0.011364258  | 2.589391090  |
| C                 | -0.154294400 | 2.368560839  | -0.228097051 | H                | -3.661853150 | -1.418918867 | 2.393878715  |
| N                 | 1.404369071  | 0.571382898  | -0.376510349 | H                | -3.612017409 | -0.196263855 | 1.119724239  |
| N                 | -1.062510161 | 1.399752420  | -0.499362976 | H                | -0.248065197 | -0.592215840 | -1.977322344 |
| C                 | 2.682777691  | 0.079752886  | -0.554870687 | H                | -3.240779428 | 5.282742886  | -0.254092303 |
| C                 | -2.382434998 | 1.764247415  | -0.767357694 | H                | 5.461927976  | 2.377869486  | 0.109152465  |
| N                 | 3.775825139  | 0.877591582  | -0.315158120 | H                | 2.213650993  | 3.812355523  | 0.212015582  |
| N                 | -2.782042422 | 3.067571255  | -0.586050700 | H                | 0.199118945  | 4.486681642  | 0.107744000  |
| C                 | 3.587291005  | 2.154794663  | -0.023848014 | H                | 5.981209683  | -2.982151710 | 0.907052961  |
| C                 | -1.877086833 | 3.971567282  | -0.267114194 | H                | 6.523098732  | -1.657141969 | 1.438118715  |
| O                 | -2.281383093 | 5.253546159  | -0.097325835 | H                | 7.176518554  | -0.772141211 | -2.879017362 |
| O                 | 4.666147105  | 2.927534293  | 0.214578980  | H                | 6.202902090  | -1.815666761 | -3.423269334 |
| O                 | 2.873519065  | -1.105320226 | -0.946193342 | <b>4c_hNa_2w</b> |              |              |              |
| O                 | -3.200511821 | 0.911070796  | -1.182558086 | C                | -3.181867153 | 1.554890325  | 0.394168886  |
| Ir                | -0.380056763 | -0.624383753 | -0.379940448 | C                | -3.346889053 | -1.361954249 | -0.265278285 |

|    |              |              |              |                   |              |              |              |
|----|--------------|--------------|--------------|-------------------|--------------|--------------|--------------|
| C  | -2.095591176 | 0.809912378  | 0.019356023  | H                 | 0.317845519  | -2.694036837 | 2.231894889  |
| C  | -2.165239394 | -0.638799773 | -0.269991819 | H                 | 1.989316511  | -3.254141740 | 2.344474343  |
| N  | -0.862892934 | 1.369078299  | -0.189515736 | H                 | 1.100791291  | -3.436279923 | 0.827616947  |
| N  | -0.985582299 | -1.210110306 | -0.615636828 | H                 | 0.773042447  | 0.152570391  | -1.892597445 |
| C  | -0.779548636 | 2.756316535  | -0.165490948 | H                 | -4.112049885 | -4.365192937 | -0.876464583 |
| C  | -0.966035807 | -2.522934105 | -1.082033819 | H                 | -4.154540570 | 1.109171904  | 0.560526932  |
| N  | -1.807761825 | 3.530652619  | 0.245042875  | H                 | -4.301181645 | -0.930239941 | -0.000292398 |
| N  | -2.110832775 | -3.281573725 | -1.034081339 | H                 | 2.994875903  | 3.174188535  | -4.246634577 |
| C  | -3.014038344 | 2.977904557  | 0.577467476  | H                 | 2.841014891  | 4.265841718  | -3.187682808 |
| C  | -3.231049440 | -2.708686800 | -0.634775974 | H                 | -1.174790350 | 3.460951377  | -3.937340675 |
| O  | -4.354923257 | -3.467780724 | -0.591462937 | H                 | -0.439229594 | 2.584408465  | -4.950638539 |
| O  | -3.962945624 | 3.703511345  | 1.003934564  | <b>4c_hNa1_2w</b> |              |              |              |
| O  | 0.309856303  | 3.304892672  | -0.558291811 | C                 | 2.470149224  | 2.628820344  | 0.101132411  |
| O  | 0.089545142  | -3.012129947 | -1.552624554 | C                 | -0.313788881 | 3.755843770  | 0.096354887  |
| Ir | 0.761833954  | -0.038823440 | -0.283582514 | C                 | 1.345979676  | 1.859892401  | -0.057377810 |
| C  | 2.637073335  | -1.188909295 | 0.119157614  | C                 | -0.027556396 | 2.409024232  | -0.062932963 |
| C  | 2.962518153  | 0.226965108  | 0.123745626  | N                 | 1.409489208  | 0.516862017  | -0.318008691 |
| C  | 2.257580685  | 0.834338945  | 1.214470999  | N                 | -0.999731629 | 1.499561706  | -0.316401044 |
| C  | 1.523054069  | -0.196574570 | 1.926849463  | C                 | 2.652381986  | -0.029310024 | -0.566776624 |
| C  | 1.767198329  | -1.431633609 | 1.253427883  | C                 | -2.297382162 | 1.939825121  | -0.570937929 |
| C  | 0.762270853  | 0.002562606  | 3.204362583  | N                 | 3.796035964  | 0.681497049  | -0.381228557 |
| C  | 2.423277313  | 2.242944925  | 1.701222525  | N                 | -2.626901103 | 3.256612705  | -0.353469803 |
| C  | 3.993498637  | 0.886962703  | -0.744464000 | C                 | 3.765280768  | 2.002022543  | -0.022927111 |
| C  | 3.328586810  | -2.240386688 | -0.700226988 | C                 | -1.666060512 | 4.100996102  | -0.028002923 |
| C  | 1.258344080  | -2.774931320 | 1.681140967  | O                 | -2.004391499 | 5.398788587  | 0.182586609  |
| Na | 0.924006914  | 2.369218617  | -2.474838256 | O                 | 4.839656845  | 2.645136283  | 0.169229867  |
| O  | 2.840541585  | 3.303885584  | -3.299552408 | O                 | 2.739005187  | -1.231930358 | -0.994343316 |
| O  | -0.741472335 | 2.599709052  | -4.030805525 | O                 | -3.161648501 | 1.141219155  | -1.005259364 |
| H  | 1.495691527  | 2.645310245  | 2.115294669  | Ir                | -0.429049828 | -0.560366248 | -0.275080074 |
| H  | 0.023355524  | -0.787759727 | 3.360548688  | C                 | -1.815639609 | -2.309516180 | -0.154486186 |
| H  | 0.236339019  | 0.961502517  | 3.214042495  | C                 | -0.437459663 | -2.776491519 | -0.073756800 |
| H  | 1.439416480  | -0.005209935 | 4.068845917  | C                 | 0.106523233  | -2.291284027 | 1.174962031  |
| H  | 2.768595606  | 2.913583161  | 0.912441152  | C                 | -0.895289785 | -1.535413654 | 1.863280594  |
| H  | 3.173030347  | 2.258834591  | 2.503040712  | C                 | -2.072189921 | -1.530805660 | 1.026246567  |
| H  | 3.799702033  | 1.955326790  | -0.863218844 | C                 | -0.799748015 | -0.959323964 | 3.245741939  |
| H  | 4.033305315  | 0.433497163  | -1.737953097 | C                 | 1.457961027  | -2.633373832 | 1.727360482  |
| H  | 4.989466277  | 0.779456914  | -0.294678032 | C                 | 0.200103562  | -3.799227288 | -0.970320135 |
| H  | 3.597473989  | -1.863119656 | -1.690470897 | C                 | -2.833203387 | -2.741563266 | -1.170405584 |
| H  | 2.701846939  | -3.123932162 | -0.835537579 | C                 | -3.394517846 | -0.957219385 | 1.441661799  |
| H  | 4.255500588  | -2.562276299 | -0.207095735 | Na                | 5.024371279  | -1.115972109 | -1.320671791 |

|                     |              |              |              |    |              |              |              |
|---------------------|--------------|--------------|--------------|----|--------------|--------------|--------------|
| O                   | 6.557501640  | -2.355566951 | -0.171597842 | O  | 0.417699544  | 3.003191989  | -0.521906275 |
| O                   | 5.581740739  | -1.071478690 | -3.534251774 | O  | -0.396882136 | -3.231520355 | -1.019511435 |
| H                   | 1.844391531  | -1.839254477 | 2.372064436  | Ir | 0.353061907  | -0.234533494 | 0.142223616  |
| H                   | -1.390733926 | -0.043920706 | 3.341542767  | C  | 2.117869771  | -1.343451448 | 1.045838567  |
| H                   | 0.233283307  | -0.721694545 | 3.514073847  | C  | 2.380352538  | 0.094110256  | 1.130997355  |
| H                   | -1.176876874 | -1.668384531 | 3.995565861  | C  | 1.368687481  | 0.676545561  | 1.951055808  |
| H                   | 2.185856897  | -2.816794243 | 0.936460713  | C  | 0.437846767  | -0.371190927 | 2.342260917  |
| H                   | 1.385304538  | -3.543741214 | 2.336266490  | C  | 0.955152399  | -1.623603827 | 1.830552410  |
| H                   | 1.280518380  | -3.653090429 | -1.040466653 | C  | -0.696587224 | -0.217779902 | 3.309311464  |
| H                   | -0.209754742 | -3.753517619 | -1.982650405 | C  | 1.305665289  | 2.090806664  | 2.434869856  |
| H                   | 0.025577066  | -4.813912845 | -0.588192168 | C  | 3.585931152  | 0.780097350  | 0.563194133  |
| H                   | -2.371568502 | -2.939364061 | -2.141063991 | C  | 3.022479448  | -2.350518343 | 0.405164243  |
| H                   | -3.607843160 | -1.984539493 | -1.316203971 | C  | 0.382702103  | -2.970100249 | 2.141818158  |
| H                   | -3.330325363 | -3.665808140 | -0.846936194 | C  | 2.903411411  | -0.244874561 | -3.366098982 |
| H                   | -3.282251379 | 0.019116976  | 1.921698782  | O  | 2.242135035  | -1.103169413 | -2.703705541 |
| H                   | -3.865781937 | -1.627142777 | 2.172414764  | O  | 2.867298107  | 1.004997670  | -3.242646851 |
| H                   | -4.077838237 | -0.846452934 | 0.599309928  | Na | 1.836753518  | 2.736656514  | -2.239972776 |
| H                   | -0.398548856 | -0.449064188 | -1.876348679 | O  | 3.689318918  | 3.936586174  | -1.553272817 |
| H                   | -2.963733477 | 5.474542232  | 0.042286494  | O  | 0.878570803  | 3.852044862  | -4.004223525 |
| H                   | 2.417493710  | 3.691162957  | 0.301839560  | H  | 0.279525105  | 2.464704426  | 2.470748829  |
| H                   | 0.441786480  | 4.501183234  | 0.298226361  | H  | -1.472745804 | -0.967795252 | 3.137737612  |
| H                   | 6.181245680  | -3.178035303 | 0.174866352  | H  | -1.154883902 | 0.771230550  | 3.233073463  |
| H                   | 6.884459682  | -1.895571922 | 0.615641595  | H  | -0.338705706 | -0.339036275 | 4.339466304  |
| H                   | 6.436197073  | -0.650861024 | -3.709674611 | H  | 1.899528690  | 2.762522014  | 1.814589886  |
| H                   | 5.672420986  | -1.956685897 | -3.916267831 | H  | 1.704566791  | 2.130234754  | 3.456324153  |
| <b>3a_TSr_Na_2w</b> |              |              |              | H  | 3.436436004  | 1.858720390  | 0.475922537  |
| C                   | -3.414955085 | 1.815507924  | -0.191718589 | H  | 3.843930261  | 0.383728165  | -0.422194517 |
| C                   | -3.800900947 | -1.171044830 | -0.387330264 | H  | 4.449584148  | 0.616421893  | 1.220125748  |
| C                   | -2.379361125 | 0.903741350  | -0.199752800 | H  | 3.483429610  | -1.955504810 | -0.502133072 |
| C                   | -2.566412277 | -0.559696834 | -0.311294209 | H  | 2.482978739  | -3.263211241 | 0.143315010  |
| N                   | -1.081016592 | 1.301517949  | -0.200660998 | H  | 3.828189171  | -2.622396685 | 1.098703127  |
| N                   | -1.411689140 | -1.263398504 | -0.424532793 | H  | -0.710011376 | -2.951773892 | 2.152663624  |
| C                   | -0.775471751 | 2.644698765  | -0.337746075 | H  | 0.715654614  | -3.273428490 | 3.142255974  |
| C                   | -1.452473261 | -2.615954871 | -0.749412868 | H  | 0.711112275  | -3.728567320 | 1.431245944  |
| N                   | -1.773180976 | 3.580391584  | -0.274188475 | H  | 0.512955917  | 0.073844908  | -1.564481738 |
| N                   | -2.665289963 | -3.265187050 | -0.773441743 | H  | 1.193825752  | -0.434479775 | -1.713453340 |
| C                   | -3.025199656 | 3.167069173  | -0.192041389 | H  | 3.586540039  | -0.661554325 | -4.136210101 |
| C                   | -3.766137850 | -2.563993907 | -0.588881501 | H  | -4.457533392 | 1.531306933  | -0.196993865 |
| O                   | -4.952775451 | -3.212268943 | -0.603879435 | H  | -4.735944324 | -0.636467097 | -0.301458443 |
| O                   | -4.002323325 | 4.094513811  | -0.121681488 | H  | -4.775430808 | -4.155390793 | -0.762091918 |

|                     |              |              |              |                                 |              |              |              |
|---------------------|--------------|--------------|--------------|---------------------------------|--------------|--------------|--------------|
| H                   | -3.583598132 | 4.971987196  | -0.154945016 | H                               | -1.477555600 | -0.992846645 | 3.137054883  |
| H                   | 3.453937078  | 4.533335399  | -0.827790412 | H                               | -1.163128046 | 0.745226311  | 3.245536586  |
| H                   | 4.330553905  | 3.328880371  | -1.155876791 | H                               | -0.349514013 | -0.371097660 | 4.347768176  |
| H                   | -0.056239832 | 4.053430927  | -3.852313610 | H                               | 1.890208369  | 2.752611021  | 1.846576916  |
| H                   | 0.876666977  | 3.312563902  | -4.808435487 | H                               | 1.688883451  | 2.109707724  | 3.483350424  |
| <b>4c_TSr.Na_2w</b> |              |              |              | H                               | 3.412333547  | 1.858574041  | 0.469483114  |
| C                   | -3.385541062 | 1.831644811  | -0.188259618 | H                               | 3.852587686  | 0.376522979  | -0.398353868 |
| C                   | -3.797785492 | -1.159904744 | -0.391965167 | H                               | 4.439335715  | 0.646481004  | 1.245162789  |
| C                   | -2.368521405 | 0.917015454  | -0.196741191 | H                               | 3.497408085  | -1.958686238 | -0.486055899 |
| C                   | -2.561825906 | -0.544973113 | -0.315491173 | H                               | 2.514167892  | -3.273741869 | 0.169459095  |
| N                   | -1.055844468 | 1.303333312  | -0.203093920 | H                               | 3.852005407  | -2.610126552 | 1.118290164  |
| N                   | -1.411162545 | -1.256619567 | -0.430345117 | H                               | -0.703609657 | -2.971987199 | 2.143821733  |
| C                   | -0.762279516 | 2.649589816  | -0.351772603 | H                               | 0.717555328  | -3.294585071 | 3.139189218  |
| C                   | -1.455625954 | -2.608252017 | -0.757726541 | H                               | 0.722482580  | -3.741317903 | 1.426329112  |
| N                   | -1.729784033 | 3.592686737  | -0.311059656 | H                               | 0.532415875  | 0.070385638  | -1.546414815 |
| N                   | -2.667655527 | -3.255558151 | -0.786156422 | H                               | 1.221971390  | -0.442035397 | -1.716312896 |
| C                   | -3.047592939 | 3.239848759  | -0.188587364 | H                               | 3.586226650  | -0.668404617 | -4.104886125 |
| C                   | -3.766473189 | -2.548685758 | -0.597677830 | H                               | -4.427071959 | 1.535262436  | -0.195856574 |
| O                   | -4.955150885 | -3.199022447 | -0.615671176 | H                               | -4.731189991 | -0.622785363 | -0.302932800 |
| O                   | -3.948613896 | 4.126958060  | -0.107629332 | H                               | -4.773746321 | -4.140225570 | -0.779282534 |
| O                   | 0.456137523  | 2.984898424  | -0.533582499 | H                               | 3.431027841  | 4.540978160  | -0.875700885 |
| O                   | -0.399336602 | -3.226771949 | -1.028348452 | H                               | 4.298351976  | 3.324865098  | -1.182265700 |
| Ir                  | 0.355373471  | -0.238189855 | 0.145842179  | H                               | -0.080193142 | 4.074267991  | -3.875677457 |
| C                   | 2.124613164  | -1.350860693 | 1.058719005  | H                               | 0.793891608  | 3.270506269  | -4.835180923 |
| C                   | 2.376342255  | 0.088591451  | 1.143543628  | <b>2b_TS<sub>w</sub>-NaI_2w</b> |              |              |              |
| C                   | 1.360818095  | 0.664415416  | 1.965466859  | Ir                              | -0.326312658 | -0.733037042 | -0.172307932 |
| C                   | 0.434265577  | -0.387170575 | 2.350004195  | N                               | 1.240780611  | 0.743840756  | -0.151580657 |
| C                   | 0.958552604  | -1.636124652 | 1.833564893  | N                               | -1.323224308 | 1.123718134  | -0.426301569 |
| C                   | -0.702523537 | -0.243260566 | 3.316539196  | C                               | 0.832941791  | 2.026963063  | 0.055892270  |
| C                   | 1.294868888  | 2.075600557  | 2.459761384  | C                               | -0.622026174 | 2.239902416  | -0.105448096 |
| C                   | 3.578650486  | 0.784151650  | 0.578248081  | C                               | 1.730965849  | 3.042222380  | 0.317220450  |
| C                   | 3.041563777  | -2.351969542 | 0.424727762  | C                               | -1.222985055 | 3.479501539  | -0.017333283 |
| C                   | 0.389297245  | -2.986282725 | 2.138660061  | C                               | 3.086436272  | 2.673985034  | 0.333941821  |
| C                   | 2.894507351  | -0.238792625 | -3.350518397 | C                               | -2.606075581 | 3.492942958  | -0.279648215 |
| O                   | 2.240811410  | -1.091195973 | -2.668588979 | N                               | 3.507181021  | 1.448383225  | 0.055756313  |
| O                   | 2.839040886  | 1.011157264  | -3.258827608 | N                               | -3.302583984 | 2.441238136  | -0.658730944 |
| Na                  | 1.804563003  | 2.760383678  | -2.275961596 | C                               | 2.584730432  | 0.485013893  | -0.232675069 |
| O                   | 3.681528940  | 3.945819027  | -1.597544796 | C                               | -2.660317001 | 1.233078932  | -0.801930140 |
| O                   | 0.843688672  | 3.852244494  | -4.062525432 | C                               | -0.097331087 | -2.937013806 | 0.261429210  |
| H                   | 0.268442091  | 2.449252267  | 2.492020051  | C                               | -1.513614604 | -2.583205593 | 0.205921368  |



|    |              |              |              |                                 |              |              |              |
|----|--------------|--------------|--------------|---------------------------------|--------------|--------------|--------------|
| C  | 0.489861398  | -2.222641943 | 1.349662986  | H                               | 6.803606940  | -0.571711909 | 1.676461634  |
| C  | -0.535794480 | -1.398434743 | 1.968869710  | H                               | 6.948042997  | 0.696983572  | -2.696550734 |
| C  | -1.776777845 | -1.669927145 | 1.285022750  | H                               | 6.301378279  | -0.592984596 | -3.197604639 |
| C  | 0.572256696  | -3.970275461 | -0.591457894 | <b>3f_TS<sub>w-Na1_2w</sub></b> |              |              |              |
| C  | -2.537323825 | -3.227464181 | -0.679351919 | Ir                              | -0.344810762 | -0.753877588 | -0.197775426 |
| C  | 1.882856370  | -2.377414876 | 1.873101881  | N                               | 1.269518600  | 0.646404448  | -0.174535963 |
| C  | -0.370535722 | -0.599422178 | 3.225607278  | N                               | -1.272068228 | 1.139106098  | -0.421186402 |
| C  | -3.112710095 | -1.132238037 | 1.691309627  | C                               | 0.905417661  | 1.934158160  | 0.145221720  |
| O  | -3.267573078 | 0.245987624  | -1.272174481 | C                               | -0.539081505 | 2.208708184  | -0.024071479 |
| O  | 3.011429190  | -0.662106421 | -0.596432941 | C                               | 1.825747927  | 2.880472270  | 0.499629937  |
| O  | 3.995384518  | 3.619226472  | 0.620595258  | C                               | -1.111667154 | 3.458227502  | 0.126073177  |
| O  | -3.248775091 | 4.674236163  | -0.142091394 | C                               | 3.226047749  | 2.518310035  | 0.528757118  |
| O  | 1.657753111  | -1.387533532 | -2.703088605 | C                               | -2.487210991 | 3.525576377  | -0.152233568 |
| Na | 5.265231377  | -0.144641104 | -0.630219083 | N                               | 3.558087144  | 1.252439539  | 0.114698855  |
| O  | 6.811905864  | -0.971664674 | 0.794511772  | N                               | -3.210335335 | 2.521356878  | -0.610467615 |
| O  | 6.107598794  | 0.215889236  | -2.701407870 | C                               | 2.608434768  | 0.364618054  | -0.243170749 |
| H  | 1.647791179  | -3.795150376 | -0.663486801 | C                               | -2.595902692 | 1.309195773  | -0.817408922 |
| H  | 0.157414781  | -3.987009440 | -1.601692512 | C                               | -0.066633247 | -2.911519445 | 0.343802188  |
| H  | 0.423225417  | -4.966253891 | -0.155760719 | C                               | -1.496310633 | -2.644077162 | 0.193705428  |
| H  | -3.380408346 | -2.559528542 | -0.866042331 | C                               | 0.411291493  | -2.122448020 | 1.439793862  |
| H  | 2.559674923  | -2.788406469 | 1.123191761  | C                               | -0.683178741 | -1.313673669 | 1.936272925  |
| H  | -2.925427613 | -4.137491715 | -0.205039058 | C                               | -1.870437401 | -1.691022199 | 1.193896407  |
| H  | 2.291031662  | -1.430516987 | 2.234166032  | C                               | 0.699703135  | -3.965124383 | -0.398108120 |
| H  | -2.107478158 | -3.513094044 | -1.642364464 | C                               | -2.423148638 | -3.378461779 | -0.727554921 |
| H  | 1.860792822  | -3.070858592 | 2.723459618  | C                               | 1.781223498  | -2.155006788 | 2.042449369  |
| H  | -1.099025682 | 0.213042166  | 3.282618114  | C                               | -0.638766323 | -0.416191470 | 3.136395201  |
| H  | -3.039025214 | -0.108132982 | 2.065725865  | C                               | -3.254802973 | -1.212572609 | 1.500870265  |
| H  | 0.630208097  | -0.165365212 | 3.295135563  | O                               | -3.216687788 | 0.366775001  | -1.361512804 |
| H  | -3.827540331 | -1.149190809 | 0.868922170  | O                               | 2.995404853  | -0.791113249 | -0.683539497 |
| H  | -0.515777565 | -1.238547373 | 4.105780090  | O                               | 4.118563540  | 3.331458532  | 0.893696190  |
| H  | -3.511499433 | -1.752186207 | 2.503922411  | O                               | -3.103198573 | 4.713846157  | 0.054165734  |
| H  | -0.366473066 | -0.699165332 | -1.879097134 | O                               | 1.621804736  | -1.429829655 | -2.735847551 |
| H  | 0.525724057  | -1.019494152 | -2.069033788 | Na                              | 5.236955179  | -0.155097719 | -0.808958521 |
| H  | 2.280193260  | -1.154444881 | -1.945309528 | O                               | 6.937164229  | -0.974381198 | 0.461895158  |
| H  | 1.818545918  | -0.723979854 | -3.394880628 | O                               | 5.944558831  | 0.272021446  | -2.930798612 |
| H  | -4.184084252 | 4.530090359  | -0.368015781 | H                               | 1.769881976  | -3.747632133 | -0.417757996 |
| H  | 4.883063017  | 3.221656617  | 0.577726767  | H                               | 0.351400173  | -4.060785302 | -1.429171460 |
| H  | 1.434806925  | 4.067031342  | 0.488187452  | H                               | 0.565508917  | -4.940335500 | 0.086948287  |
| H  | -0.689872254 | 4.385302891  | 0.232934595  | H                               | -3.303005542 | -2.781668500 | -0.977475058 |
| H  | 6.725334729  | -1.921111078 | 0.964436544  | H                               | 2.509619472  | -2.619802040 | 1.377472809  |

|                                          |              |              |              |    |              |              |              |
|------------------------------------------|--------------|--------------|--------------|----|--------------|--------------|--------------|
| H                                        | -2.769930307 | -4.303326949 | -0.249486608 | C  | 2.113745302  | 0.130104064  | 1.768368683  |
| H                                        | 2.134796767  | -1.153045234 | 2.300404482  | C  | 0.969231634  | 0.669888207  | 2.433511088  |
| H                                        | -1.922729582 | -3.656464318 | -1.658244854 | C  | -0.017995684 | -0.386900629 | 2.570691912  |
| H                                        | 1.746233458  | -2.738942188 | 2.970596442  | C  | 0.585657987  | -1.610333671 | 2.079807472  |
| H                                        | -1.395075744 | 0.370117208  | 3.073596279  | C  | -1.315250309 | -0.286838151 | 3.315611718  |
| H                                        | -3.267364286 | -0.153926676 | 1.771719442  | C  | 0.816498267  | 2.049418080  | 2.993708592  |
| H                                        | 0.339219026  | 0.061082025  | 3.239570857  | C  | 3.410337322  | 0.837015279  | 1.512498972  |
| H                                        | -3.936600674 | -1.366036352 | 0.664216118  | C  | 2.886627456  | -2.273130477 | 1.028130114  |
| H                                        | -0.828719519 | -0.986350674 | 4.054667889  | C  | -0.038080761 | -2.965741206 | 2.198585028  |
| H                                        | -3.639453024 | -1.775644025 | 2.360484201  | C  | 3.560126010  | -0.174562531 | -2.337332999 |
| H                                        | -0.405470193 | -0.730720829 | -1.906769329 | O  | 2.540066846  | -0.917163449 | -2.176027562 |
| H                                        | 0.482010013  | -1.053770872 | -2.089180440 | O  | 3.696515641  | 1.032193844  | -2.029176711 |
| H                                        | 2.243903598  | -1.196510811 | -1.954870756 | Na | 2.076273146  | 2.606755859  | -1.709667031 |
| H                                        | 1.781623106  | -0.756033449 | -3.416955009 | O  | 4.619142425  | -0.824131915 | -2.925068038 |
| H                                        | -4.038157953 | 4.606942105  | -0.191764958 | O  | 3.284494872  | 4.539170238  | -2.049516211 |
| H                                        | 1.540797553  | 3.895084960  | 0.746251491  | O  | 0.666518085  | 1.877229197  | -3.426867277 |
| H                                        | -0.556342635 | 4.332243387  | 0.434750685  | H  | -0.200781912 | 2.427457478  | 2.864998219  |
| H                                        | 6.858135031  | -1.922632108 | 0.642147764  | H  | -2.044313914 | -1.012280940 | 2.945560084  |
| H                                        | 6.953285924  | -0.568531306 | 1.341179405  | H  | -1.752270600 | 0.710635910  | 3.224135404  |
| H                                        | 6.648874791  | 0.935972473  | -2.967205884 | H  | -1.162570108 | -0.484912185 | 4.384167887  |
| H                                        | 6.326377870  | -0.500617290 | -3.372553518 | H  | 1.509745643  | 2.757688786  | 2.539131457  |
| <b>4c_TS<sub>b</sub>-Na<sub>2</sub>w</b> |              |              |              | H  | 1.020152024  | 2.018191372  | 4.071519276  |
| C                                        | -3.178511885 | 2.093944546  | -0.819430431 | H  | 3.268489401  | 1.917278779  | 1.430495444  |
| C                                        | -3.601060121 | -0.879417661 | -1.157493967 | H  | 3.888148312  | 0.482859238  | 0.596784902  |
| C                                        | -2.223365339 | 1.154012130  | -0.544646770 | H  | 4.104299860  | 0.653275489  | 2.342692323  |
| C                                        | -2.412975681 | -0.299390312 | -0.749574125 | H  | 3.536470618  | -1.815209230 | 0.279455302  |
| N                                        | -0.956358393 | 1.507430716  | -0.163314746 | H  | 2.407658960  | -3.143656303 | 0.575182818  |
| N                                        | -1.286814745 | -1.039411532 | -0.595442925 | H  | 3.522626210  | -2.628658437 | 1.848865734  |
| C                                        | -0.597103901 | 2.845701516  | -0.232611113 | H  | -1.110459710 | -2.938019782 | 1.987505625  |
| C                                        | -1.267433722 | -2.374735208 | -0.989478290 | H  | 0.082650469  | -3.318756490 | 3.230551998  |
| N                                        | -1.514056282 | 3.810846649  | -0.462184083 | H  | 0.427492735  | -3.693649269 | 1.534219820  |
| N                                        | -2.443422980 | -2.990007078 | -1.345011732 | H  | 0.829985581  | 0.303781637  | -1.204844899 |
| C                                        | -2.822334700 | 3.492989346  | -0.710608176 | H  | 1.483137978  | -0.267226464 | -1.347153062 |
| C                                        | -3.541763664 | -2.259927067 | -1.408273154 | H  | -4.178618976 | 1.823625478  | -1.134262160 |
| O                                        | -4.697034321 | -2.876937500 | -1.756349089 | H  | -4.517987151 | -0.322168220 | -1.285811383 |
| O                                        | -3.688990855 | 4.402544039  | -0.872868841 | H  | -4.491726811 | -3.812816198 | -1.923384079 |
| O                                        | 0.635072133  | 3.151491345  | -0.077561105 | H  | 5.337335157  | -0.175916665 | -3.008187811 |
| O                                        | -0.183598077 | -3.003236974 | -1.026339056 | H  | 4.109216137  | 4.524237927  | -1.541553864 |
| Ir                                       | 0.329701033  | -0.092216185 | 0.406840853  | H  | 2.793131511  | 5.284329894  | -1.673368235 |
| C                                        | 1.875545256  | -1.298036319 | 1.549752255  | H  | -0.247858294 | 1.892802919  | -3.106665084 |

|                              |              |              |              |                              |              |              |              |
|------------------------------|--------------|--------------|--------------|------------------------------|--------------|--------------|--------------|
| H                            | 0.866580874  | 0.932509449  | -3.512645493 | H                            | -0.406554968 | -5.004555955 | -0.448743924 |
| <b>3a_d<sub>Na1_2w</sub></b> |              |              |              | H                            | -2.626154847 | -3.105671962 | -1.947980781 |
| C                            | 2.375799817  | 2.522981604  | 0.400217333  | H                            | -3.744245998 | -1.987763001 | -1.150451314 |
| C                            | -0.461516915 | 3.556161713  | 0.259763730  | H                            | -3.544054402 | -3.635086525 | -0.533915193 |
| C                            | 1.284426855  | 1.743734901  | 0.077192203  | H                            | -3.000617416 | 0.383697784  | 1.731973117  |
| C                            | -0.100973637 | 2.253326790  | -0.010741923 | H                            | -3.680967637 | -1.155559190 | 2.263687282  |
| N                            | 1.421637667  | 0.443174912  | -0.294413141 | H                            | -3.987265270 | -0.581702929 | 0.616044971  |
| N                            | -0.996474444 | 1.348546459  | -0.483245940 | H                            | -0.625653704 | -0.561699911 | -2.253318879 |
| C                            | 2.680487249  | -0.080679114 | -0.494334795 | H                            | 0.134862405  | -0.857533667 | -2.201718512 |
| C                            | -2.281211021 | 1.755334328  | -0.833172168 | H                            | -3.159043410 | 5.192953805  | 0.055000863  |
| N                            | 3.788227751  | 0.653085874  | -0.146643142 | H                            | 5.505403623  | 2.049456049  | 0.474564954  |
| N                            | -2.683996920 | 3.034016438  | -0.525850122 | H                            | 2.297955578  | 3.559289757  | 0.695773212  |
| C                            | 3.628784789  | 1.892517047  | 0.288732221  | H                            | 0.228360014  | 4.299323471  | 0.633614844  |
| C                            | -1.811461423 | 3.868881422  | 0.001169883  | H                            | 6.232138167  | -3.443407059 | -0.274221521 |
| O                            | -2.221043379 | 5.119828423  | 0.303134285  | H                            | 6.779070802  | -2.348575089 | 0.641257488  |
| O                            | 4.719106155  | 2.603647330  | 0.622656800  | H                            | 6.755045266  | -0.162185899 | -3.342263035 |
| O                            | 2.833486708  | -1.222020900 | -1.008353558 | H                            | 5.752690417  | -1.123411550 | -3.979437240 |
| O                            | -3.052141115 | 0.967422124  | -1.423259177 | <b>4c_d<sub>Na1_2w</sub></b> |              |              |              |
| Ir                           | -0.383859270 | -0.676190885 | -0.435697516 | C                            | 2.389183185  | 2.462349049  | 0.435465562  |
| C                            | -1.915259720 | -2.335808826 | -0.069877301 | C                            | -0.438997502 | 3.543657080  | 0.257602484  |
| C                            | -0.572435685 | -2.921594245 | -0.018811519 | C                            | 1.299207811  | 1.712848686  | 0.092097530  |
| C                            | 0.138674193  | -2.307731811 | 1.050583464  | C                            | -0.079602447 | 2.237502535  | -0.011140624 |
| C                            | -0.717422071 | -1.276549304 | 1.629909198  | N                            | 1.419029772  | 0.405569925  | -0.304819827 |
| C                            | -2.015782722 | -1.376062319 | 0.980418013  | N                            | -0.982776660 | 1.343365605  | -0.491460160 |
| C                            | -0.422499267 | -0.496716355 | 2.874876097  | C                            | 2.680520106  | -0.111750980 | -0.507220470 |
| C                            | 1.486486583  | -2.687728369 | 1.574303930  | C                            | -2.263087301 | 1.758091732  | -0.847043363 |
| C                            | -0.093292867 | -4.046554494 | -0.881648099 | N                            | 3.789709325  | 0.585559312  | -0.151447828 |
| C                            | -3.016232587 | -2.783213385 | -0.980105412 | N                            | -2.659023290 | 3.039244548  | -0.547809290 |
| C                            | -3.238974485 | -0.631599674 | 1.406875968  | C                            | 3.703850653  | 1.857341006  | 0.350268470  |
| Na                           | 5.132404341  | -1.078191179 | -1.251792917 | C                            | -1.780658967 | 3.866178672  | -0.013148349 |
| O                            | 6.565751139  | -2.534327482 | -0.284905759 | O                            | -2.186473674 | 5.122802621  | 0.281725267  |
| O                            | 5.823307341  | -0.424776309 | -3.312047097 | O                            | 4.742794701  | 2.487962734  | 0.694829600  |
| H                            | 2.058275201  | -1.811941588 | 1.888989093  | O                            | 2.808319833  | -1.258405581 | -1.054295429 |
| H                            | -1.003070948 | 0.427699942  | 2.914434586  | O                            | -3.038119719 | 0.971834349  | -1.438245300 |
| H                            | 0.637525684  | -0.242689633 | 2.947348093  | Ir                           | -0.390738820 | -0.685110550 | -0.437471321 |
| H                            | -0.683077044 | -1.092401481 | 3.758542768  | C                            | -1.932752247 | -2.343082771 | -0.059039516 |
| H                            | 2.069302843  | -3.245587668 | 0.840767710  | C                            | -0.588136055 | -2.924031512 | -0.003358952 |
| H                            | 1.349898438  | -3.325556171 | 2.456531859  | C                            | 0.120929549  | -2.301886898 | 1.063745747  |
| H                            | 0.995559740  | -4.053500318 | -0.962697145 | C                            | -0.736038168 | -1.266773394 | 1.631515346  |
| H                            | -0.514262371 | -3.985067027 | -1.887693376 | C                            | -2.033948654 | -1.372553722 | 0.978707586  |

|    |              |              |              |   |              |              |              |
|----|--------------|--------------|--------------|---|--------------|--------------|--------------|
| C  | -0.446747381 | -0.478180603 | 2.872855275  | H | -2.640981762 | -3.128721785 | -1.932467376 |
| C  | 1.467815097  | -2.678073011 | 1.594059187  | H | -3.761159305 | -2.006703818 | -1.144956107 |
| C  | -0.107931608 | -4.059360488 | -0.852821315 | H | -3.560741681 | -3.649273364 | -0.516699461 |
| C  | -3.032277171 | -2.799922747 | -0.967110904 | H | -3.018368499 | 0.405880357  | 1.688173449  |
| C  | -3.256326648 | -0.619534158 | 1.395417846  | H | -3.691481500 | -1.117936944 | 2.270726215  |
| Na | 5.108443202  | -1.037956036 | -1.282379141 | H | -4.011178578 | -0.592968287 | 0.609495131  |
| O  | 6.602958951  | -2.482087166 | -0.356061485 | H | -0.628564733 | -0.572784328 | -2.246346940 |
| O  | 5.788279529  | -0.399773572 | -3.364429408 | H | 0.135817398  | -0.866598131 | -2.191611073 |
| H  | 2.038266463  | -1.799345551 | 1.903054051  | H | -3.120728953 | 5.198384009  | 0.021401764  |
| H  | -1.026396567 | 0.447292880  | 2.903147129  | H | 2.303156991  | 3.498084870  | 0.738005696  |
| H  | 0.612982375  | -0.223717827 | 2.948730484  | H | 0.253951146  | 4.280575345  | 0.638157786  |
| H  | -0.711852123 | -1.065983981 | 3.760564192  | H | 6.268675194  | -3.390757360 | -0.334496835 |
| H  | 2.053557758  | -3.238952037 | 0.864974875  | H | 6.796342134  | -2.279074411 | 0.570986587  |
| H  | 1.331701861  | -3.310779184 | 2.480019454  | H | 6.624814543  | 0.087527741  | -3.343543580 |
| H  | 0.981167036  | -4.068562907 | -0.930873758 | H | 5.961757508  | -1.138423735 | -3.965996594 |
| H  | -0.525103901 | -4.007937533 | -1.861118472 |   |              |              |              |
| H  | -0.423328054 | -5.013056783 | -0.411855914 |   |              |              |              |

## References

- 1 C. J. Cramer, *Essentials of Computational Chemistry: Theories and Models*. 2 ed.; John Wiley & Sons, Ltd: New York, 2004; p 378-79.
- 2 V. S. Bryantsev, M. S. Diallo and W. A. Goddard Iii, *J. Phys. Chem. B*, 2008, **112**, 9709-19.
- 3 J. F. Hull, Y. Himeda, W.-H. Wang, B. Hashiguchi, R. Periana, D. J. Szalda, J. T. Muckerman and E. Fujita, *Nat. Chem.*, 2012, **4**, 383-88.
- 4 W.-H. Wang, J. F. Hull, J. T. Muckerman, E. Fujita and Y. Himeda, *Energy Environ. Sci.*, 2012, **5**, 7923-26.
- 5 Y. Suna, M. Z. Ertem, W.-H. Wang, H. Kambayashi, Y. Manaka, J. T. Muckerman, E. Fujita and Y. Himeda, *Organometallics*, 2014.
- 6 Y. Marcus, *J. Chem. Soc., Faraday Trans.*, 1991, **87**, 2995-99.
- 7 W.-H. Wang, S. Xu, Y. Manaka, Y. Suna, H. Kambayashi, J. T. Muckerman, E. Fujita and Y. Himeda, *ChemSusChem*, 2014, **7**, 1976-83.
